# Supplementary material for: Prevalence and Antimicrobial Susceptibility of Indicator Organisms Escherichia coli and Enterococcus spp. Isolated from U.S. Animal Food, 2005–2011
Source: Microorganisms. 2020 Jul 15;8(7):1048. doi: 10.3390/microorganisms8071048 (PMC7409216; doi:10.3390/microorganisms8071048)
Supplement: Supplementary file 1 [file microorganisms-08-01048-s001.xlsx]

## Sheet: Table_S1_E_coli
Isolate ID	Genus	Species	Sample ID	Year	Feed Category	Feed Type	Amikacin	Gentamicin	Kanamycin	Streptomycin	Amoxicillin-clavulanic acid	Cefoxitin	Ceftiofur	Ceftriaxone	Sulfisoxazole	Trimethoprim-Sulfamethoxazole	Ampicillin	Chloramphenicol	Ciprofloxacin	Nalidixic Acid	Tetracycline
1	Escherichia	coli	8	2006	Animal feed	Poultry feed	2	0.5	< 8	< 32	4	4	0.5	< 0.25	< 16	< 0.12	4	8	< 0.015	2	< 4
2	Escherichia	coli	9	2006	Animal feed	Ingredient	2	0.5	< 8	< 32	2	4	0.5	< 0.25	< 16	< 0.12	2	8	< 0.015	2	< 4
3	Escherichia	coli	9	2006	Animal feed	Ingredient	4	1	< 8	< 32	4	4	0.5	< 0.25	< 16	< 0.12	4	8	< 0.015	4	< 4
4	Escherichia	coli	11	2006	Animal feed	Ingredient	2	2	< 8	< 32	4	8	0.25	< 0.25	< 16	< 0.12	2	8	< 0.015	2	< 4
5	Escherichia	coli	11	2006	Animal feed	Ingredient	2	0.5	< 8	< 32	4	4	0.5	< 0.25	< 16	< 0.12	4	8	< 0.015	2	< 4
6	Escherichia	coli	13	2006	Animal feed	Swine feed	4	0.5	< 8	< 32	8	8	0.5	< 0.25	32	< 0.12	4	8	< 0.015	4	< 4
7	Escherichia	coli	13	2006	Animal feed	Swine feed	2	0.5	< 8	< 32	4	4	0.5	< 0.25	32	0.25	4	8	< 0.015	4	< 4
8	Escherichia	coli	14	2006	Animal feed	Cattle feed	2	0.5	< 8	> 64	4	4	0.5	< 0.25	< 16	< 0.12	> 32	8	< 0.015	2	> 32
9	Escherichia	coli	20	2006	Animal feed	Cattle feed	2	0.5	< 8	< 32	4	4	0.5	< 0.25	< 16	< 0.12	2	8	< 0.015	2	< 4
11	Escherichia	coli	20	2006	Animal feed	Cattle feed	2	1	< 8	< 32	2	4	0.25	< 0.25	< 16	< 0.12	2	4	< 0.015	2	< 4
12	Escherichia	coli	21	2006	Animal feed	Poultry feed	2	0.5	< 8	< 32	4	2	0.25	< 0.25	32	0.25	4	8	< 0.015	2	< 4
13	Escherichia	coli	22	2006	Animal feed	Poultry feed	4	0.5	< 8	< 32	4	4	0.25	< 0.25	< 16	< 0.12	2	8	< 0.015	2	< 4
14	Escherichia	coli	22	2006	Animal feed	Poultry feed	8	1	< 8	< 32	4	4	0.5	< 0.25	< 16	< 0.12	2	8	< 0.015	2	< 4
15	Escherichia	coli	23	2006	Animal feed	Poultry feed	2	0.5	< 8	< 32	4	4	0.5	< 0.25	32	< 0.12	2	8	< 0.015	2	< 4
16	Escherichia	coli	27	2006	Animal feed	Ingredient	2	0.5	< 8	< 32	4	4	0.5	< 0.25	< 16	< 0.12	4	8	< 0.015	4	< 4
17	Escherichia	coli	27	2006	Animal feed	Ingredient	4	0.5	< 8	< 32	4	4	0.5	< 0.25	< 16	< 0.12	2	4	< 0.015	4	< 4
18	Escherichia	coli	28	2006	Animal feed	Feed for minor species	2	0.5	< 8	< 32	4	2	0.25	< 0.25	< 16	< 0.12	2	4	< 0.015	2	< 4
19	Escherichia	coli	35	2006	Animal feed	Poultry feed	2	0.5	< 8	< 32	4	8	0.5	< 0.25	< 16	< 0.12	4	8	< 0.015	2	< 4
20	Escherichia	coli	38	2006	Animal feed	Poultry feed	4	0.5	< 8	< 32	4	4	0.5	< 0.25	< 16	< 0.12	4	8	< 0.015	2	< 4
21	Escherichia	coli	39	2006	Animal feed	Poultry feed	4	0.5	< 8	< 32	4	8	0.5	< 0.25	< 16	< 0.12	4	8	< 0.015	2	< 4
23	Escherichia	coli	42	2006	Animal feed	Poultry feed	2	0.5	< 8	< 32	4	4	0.5	< 0.25	< 16	< 0.12	2	8	< 0.015	2	< 4
24	Escherichia	coli	42	2006	Animal feed	Poultry feed	2	0.5	< 8	< 32	4	4	0.5	< 0.25	32	< 0.12	4	4	< 0.015	2	< 4
25	Escherichia	coli	43	2006	Animal feed	Poultry feed	2	0.5	< 8	64	4	4	0.5	< 0.25	32	< 0.12	4	8	< 0.015	4	> 32
26	Escherichia	coli	43	2006	Animal feed	Poultry feed	2	1	< 8	< 32	4	8	0.25	< 0.25	< 16	< 0.12	4	4	< 0.015	2	< 4
27	Escherichia	coli	44	2006	Animal feed	Ingredient	2	1	< 8	< 32	4	4	0.5	< 0.25	< 16	< 0.12	4	8	< 0.015	2	< 4
28	Escherichia	coli	44	2006	Animal feed	Ingredient	4	0.5	< 8	< 32	8	4	0.5	< 0.25	< 16	< 0.12	4	4	< 0.015	2	< 4
29	Escherichia	coli	45	2006	Animal feed	Ingredient	1	1	< 8	< 32	4	4	0.5	< 0.25	< 16	< 0.12	2	8	< 0.015	2	< 4
30	Escherichia	coli	45	2006	Animal feed	Ingredient	2	0.5	< 8	< 32	4	4	0.5	< 0.25	< 16	< 0.12	> 32	8	< 0.015	2	> 32
31	Escherichia	coli	49	2006	Animal feed	Cattle feed	2	2	< 8	< 32	4	4	0.5	< 0.25	< 16	< 0.12	4	4	< 0.015	2	32
32	Escherichia	coli	49	2006	Animal feed	Cattle feed	2	0.5	< 8	< 32	4	4	0.5	< 0.25	< 16	< 0.12	2	4	< 0.015	2	32
33	Escherichia	coli	50	2006	Animal feed	Swine feed	4	0.5	< 8	< 32	4	4	0.25	< 0.25	< 16	< 0.12	2	8	< 0.015	2	< 4
34	Escherichia	coli	50	2006	Animal feed	Swine feed	2	2	< 8	< 32	4	4	0.25	< 0.25	32	< 0.12	2	8	< 0.015	2	< 4
35	Escherichia	coli	51	2006	Animal feed	Cattle feed	4	1	< 8	< 32	4	4	0.5	< 0.25	< 16	< 0.12	4	8	< 0.015	2	< 4
36	Escherichia	coli	51	2006	Animal feed	Cattle feed	4	1	< 8	< 32	4	4	0.5	< 0.25	< 16	< 0.12	4	8	< 0.015	2	< 4
37	Escherichia	coli	54	2006	Animal feed	Ingredient	2	0.5	< 8	< 32	8	4	0.5	< 0.25	< 16	< 0.12	4	4	< 0.015	2	< 4
38	Escherichia	coli	54	2006	Animal feed	Ingredient	2	0.5	< 8	< 32	2	2	0.25	< 0.25	< 16	< 0.12	2	8	< 0.015	1	< 4
39	Escherichia	coli	56	2006	Animal feed	Ingredient	2	0.5	< 8	< 32	4	4	0.5	< 0.25	< 16	< 0.12	2	4	< 0.015	2	< 4
40	Escherichia	coli	56	2006	Animal feed	Ingredient	4	0.5	< 8	< 32	4	8	0.5	< 0.25	32	< 0.12	4	8	< 0.015	2	< 4
41	Escherichia	coli	59	2006	Animal feed	Medicated feed	2	0.5	16	< 32	4	4	0.5	< 0.25	< 16	< 0.12	2	4	< 0.015	4	< 4
42	Escherichia	coli	60	2006	Animal feed	Medicated feed	2	0.5	< 8	< 32	8	8	0.5	< 0.25	< 16	< 0.12	4	8	< 0.015	4	< 4
43	Escherichia	coli	62	2006	Animal feed	Ingredient	4	0.5	< 8	< 32	4	4	0.5	< 0.25	< 16	< 0.12	4	8	< 0.015	2	< 4
44	Escherichia	coli	62	2006	Animal feed	Ingredient	2	0.5	< 8	< 32	4	4	0.5	< 0.25	< 16	< 0.12	2	8	< 0.015	2	< 4
45	Escherichia	coli	79	2006	Animal feed	Cattle feed	4	0.5	< 8	< 32	4	4	0.25	< 0.25	< 16	< 0.12	2	4	< 0.015	2	< 4
46	Escherichia	coli	79	2006	Animal feed	Cattle feed	2	0.5	< 8	< 32	4	8	0.5	< 0.25	< 16	< 0.12	4	4	< 0.015	2	< 4
48	Escherichia	coli	71	2006	Pet food	Pet food/treat	1	0.5	< 8	64	32	32	2	1	< 16	< 0.12	> 32	4	< 0.015	2	< 4
50	Escherichia	coli	85	2007	Pet food	Pet food/treat	2	0.5	16	< 32	4	4	0.5	< 0.25	< 16	< 0.12	2	8	< 0.015	2	< 4
52	Escherichia	coli	85	2007	Pet food	Pet food/treat	2	1	< 8	< 32	4	2	0.25	< 0.25	< 16	< 0.12	2	4	< 0.015	2	< 4
54	Escherichia	coli	87	2007	Pet food	Pet food/treat	1	0.5	< 8	< 32	4	8	0.5	< 0.25	< 16	< 0.12	4	8	< 0.015	2	< 4
55	Escherichia	coli	87	2007	Pet food	Pet food/treat	2	1	< 8	< 32	2	4	0.5	< 0.25	< 16	< 0.12	2	8	< 0.015	2	8
56	Escherichia	coli	87	2007	Pet food	Pet food/treat	2	0.5	< 8	< 32	4	16	0.5	< 0.25	< 16	< 0.12	4	8	< 0.015	4	< 4
57	Escherichia	coli	87	2007	Pet food	Pet food/treat	2	0.5	> 64	> 64	4	4	0.5	< 0.25	> 256	0.25	4	8	< 0.015	2	> 32
58	Escherichia	coli	95	2007	Animal feed	Poultry feed	4	0.5	< 8	< 32	2	4	0.25	< 0.25	32	< 0.12	4	4	< 0.015	2	< 4
59	Escherichia	coli	95	2007	Animal feed	Poultry feed	2	0.5	< 8	< 32	4	2	0.25	< 0.25	< 16	< 0.12	2	8	< 0.015	4	< 4
60	Escherichia	coli	129	2007	Animal feed	Poultry feed	2	1	< 8	< 32	4	8	0.25	< 0.25	< 16	< 0.12	2	8	< 0.015	2	< 4
61	Escherichia	coli	129	2007	Animal feed	Poultry feed	2	0.5	< 8	< 32	4	2	0.25	< 0.25	< 16	< 0.12	2	8	< 0.015	2	< 4
65	Escherichia	coli	131	2007	Animal feed	Animal feed (for unspecified animal species)	2	0.5	< 8	< 32		4	0.5	< 0.25	< 16	< 0.12	< 1	8	< 0.015	2	< 4
67	Escherichia	coli	137	2007	Animal feed	Ingredient	4	1	< 8	< 32	4	8	0.5	< 0.25	< 16	< 0.12	4	8	< 0.015	4	< 4
70	Escherichia	coli	149	2007	Animal feed	Cattle feed	4	1	< 8	< 32	4	8	0.5	< 0.25	< 16	< 0.12	4	8	< 0.015	4	< 4
71	Escherichia	coli	149	2007	Animal feed	Cattle feed	4	1	16	< 32		4	0.25	< 0.25	< 16	< 0.12	< 1	4	< 0.015	2	< 4
72	Escherichia	coli	149	2007	Animal feed	Cattle feed	2	0.5	< 8	< 32	4	4	0.5	< 0.25	< 16	< 0.12	4	8	< 0.015	4	< 4
73	Escherichia	coli	149	2007	Animal feed	Cattle feed	2	0.5	< 8	< 32	4	4	0.5	< 0.25	< 16	< 0.12	4	8	< 0.015	4	< 4
74	Escherichia	coli	151	2007	Animal feed	Feed for minor species	2	0.5	< 8	4	4	8	0.5	< 0.25	< 16	< 0.12	4	8	> 4	>32	> 32
77	Escherichia	coli	151	2007	Animal feed	Feed for minor species	8	2	< 8	4	8	16	0.5	< 0.25	< 16	< 0.12	4	8	> 4	>32	> 32
79	Escherichia	coli	152	2007	Animal feed	Animal feed (for unspecified animal species)	2	1	< 8	< 32	4	2	0.25	< 0.25	< 16	< 0.12	4	8	< 0.015	2	< 4
81	Escherichia	coli	156	2007	Pet food	Pet food/treat	2	1	< 8	< 32	4	4	0.5	< 0.25	< 16	< 0.12	4	8	< 0.015	2	< 4
83	Escherichia	coli	169	2007	Animal feed	Poultry feed	2	0.5	< 8	< 32	4	4	0.5	< 0.25	< 16	< 0.12	4	8	< 0.015	4	< 4
86	Escherichia	coli	237	2008	Pet food	Pet food/treat	2	1	< 8	< 32	8	16	0.5	< 0.25	< 16	0.25	8	8	< 0.015	4	< 4
87	Escherichia	coli	237	2008	Pet food	Pet food/treat	2	1	< 8	< 32	4	4	0.5	< 0.25	< 16	< 0.12	4	8	< 0.015	2	< 4
91	Escherichia	coli	256	2008	Pet food	Pet food/treat	4	2	< 8	< 32	4	2	0.25	< 0.25	< 16	< 0.12	2	8	< 0.015	2	< 4
92	Escherichia	coli	256	2008	Pet food	Pet food/treat	4	1	< 8	< 32	4	8	0.5	< 0.25	< 16	< 0.12	2	8	< 0.015	2	< 4
93	Escherichia	coli	256	2008	Pet food	Pet food/treat	2	1	< 8	< 32	4	4	0.25	< 0.25	< 16	< 0.12	2	4	< 0.015	2	< 4
94	Escherichia	coli	256	2008	Pet food	Pet food/treat	2	1	< 8	< 32	4	4	0.25	< 0.25	< 16	< 0.12	4	4	< 0.015	2	< 4
100	Escherichia	coli	209	2008	Pet food	Pet food/treat	4	1	< 8	< 32	2	4	0.25	< 0.25	< 16	< 0.12	< 1	8	< 0.015	4	< 4
101	Escherichia	coli	214	2008	Animal feed	Animal feed (for unspecified animal species)	2	1	< 8	< 32	8	4	0.5	< 0.25	< 16	< 0.12	4	8	< 0.015	2	< 4
102	Escherichia	coli	237	2008	Pet food	Pet food/treat	2	1	< 8	< 32	8	4	0.5	< 0.25	< 16	< 0.12	4	8	0.03	4	< 4
103	Escherichia	coli	252	2008	Animal feed	Animal feed (for unspecified animal species)	4	1	< 8	< 32	4	4	0.25	< 0.25	< 16	< 0.12	2	8	< 0.015	2	< 4
104	Escherichia	coli	252	2008	Animal feed	Animal feed (for unspecified animal species)	4	1	< 8	< 32	2	8	0.25	< 0.25	< 16	< 0.12	2	8	< 0.015	2	< 4
105	Escherichia	coli	263	2008	Animal feed	Ingredient	2	1	< 8	< 32	4	4	0.5	< 0.25	< 16	< 0.12	4	8	< 0.015	2	< 4
106	Escherichia	coli	263	2008	Animal feed	Ingredient	2	1	< 8	< 32	4	4	0.25	< 0.25	< 16	< 0.12	4	8	< 0.015	2	< 4
107	Escherichia	coli	264	2008	Pet food	Pet food/treat	8	1	< 8	< 32	2	8	0.5	< 0.25	< 16	< 0.12	2	8	< 0.015	4	> 32
108	Escherichia	coli	270	2008	Animal feed	Ingredient	4	1	< 8	< 32	4	8	0.5	< 0.25	< 16	< 0.12	4	8	< 0.015	2	< 4
109	Escherichia	coli	270	2008	Animal feed	Ingredient	4	1	< 8	< 32	8	8	0.5	< 0.25	< 16	< 0.12	4	8	< 0.015	2	< 4
110	Escherichia	coli	270	2008	Animal feed	Ingredient	2	1	< 8	< 32	2	4	0.5	< 0.25	< 16	< 0.12	2	8	< 0.015	4	< 4
111	Escherichia	coli	270	2008	Animal feed	Ingredient	4	1	< 8	< 32	4	4	0.25	< 0.25	< 16	< 0.12	2	16	< 0.015	4	< 4
112	Escherichia	coli	288	2008	Animal feed	Ingredient	2	1	< 8	< 32	4	4	0.25	< 0.25	< 16	< 0.12	2	4	< 0.015	2	< 4
113	Escherichia	coli	288	2008	Animal feed	Ingredient	4	1	< 8	< 32	4	4	0.25	< 0.25	< 16	< 0.12	2	8	< 0.015	2	< 4
118	Escherichia	coli	314	2008	Animal feed	Cattle feed	4	1	< 8	< 32		2	0.25	< 0.25	> 256	< 0.12	< 1	8	< 0.015	2	> 32
119	Escherichia	coli	320	2008	Pet food	Pet food/treat	4	0.5	< 8	< 32		4	0.5	< 0.25	< 16	< 0.12	2	8	< 0.015	2	< 4
120	Escherichia	coli	320	2008	Pet food	Pet food/treat	2	1	< 8	< 32		4	0.25	< 0.25	< 16	< 0.12	2	8	< 0.015	2	< 4
121	Escherichia	coli	323	2008	Animal feed	Animal feed (for unspecified animal species)	4	1	< 8	< 32		2	0.5	< 0.25	< 16	< 0.12	4	8	< 0.015	2	< 4
122	Escherichia	coli	323	2008	Animal feed	Animal feed (for unspecified animal species)	4	1	< 8	< 32		4	0.5	< 0.25	< 16	< 0.12	4	8	< 0.015	2	< 4
123	Escherichia	coli	323	2008	Animal feed	Animal feed (for unspecified animal species)	4	1	< 8	< 32		8	0.5	< 0.25	< 16	< 0.12	4	8	< 0.015	2	< 4
126	Escherichia	coli	326	2008	Animal feed	Ingredient	8	1	< 8	< 32	8	4	0.5	< 0.25	< 16	< 0.12	4	8	< 0.015	4	< 4
127	Escherichia	coli	326	2008	Animal feed	Ingredient	4	1	< 8	< 32	8	8	0.5	< 0.25	< 16	< 0.12	4	16	< 0.015	4	< 4
128	Escherichia	coli	326	2008	Animal feed	Ingredient	2	1	< 8	< 32	4	4	0.25	< 0.25	< 16	< 0.12	2	8	< 0.015	2	< 4
129	Escherichia	coli	326	2008	Animal feed	Ingredient	4	2	< 8	< 32	2	2	0.25	< 0.25	< 16	< 0.12	2	4	< 0.015	2	< 4
130	Escherichia	coli	340	2008	Animal feed	Ingredient	2	0.5	< 8	< 32	2	4	0.25	< 0.25	< 16	< 0.12	2	4	< 0.015	2	< 4
131	Escherichia	coli	344	2008	Animal feed	Ingredient	4	1	< 8	< 32	4	4	0.5	< 0.25	< 16	< 0.12	2	4	< 0.015	2	< 4
132	Escherichia	coli	344	2008	Animal feed	Ingredient	4	1	< 8	< 32	4	4	0.5	< 0.25	< 16	< 0.12	4	4	< 0.015	2	< 4
134	Escherichia	coli	355	2008	Animal feed	Cattle feed	4	1	< 8	< 32	4	4	0.5	< 0.25	< 16	< 0.12	4	8	< 0.015	2	< 4
135	Escherichia	coli	355	2008	Animal feed	Cattle feed	4	1	< 8	< 32	4	4	0.5	< 0.25	< 16	< 0.12	4	8	< 0.015	4	< 4
138	Escherichia	coli	357	2009	Animal feed	Cattle feed	4	1	< 8	< 32	4	4	0.5	< 0.25	< 16	< 0.12	4	8	< 0.015	2	< 4
139	Escherichia	coli	357	2009	Animal feed	Cattle feed	4	1	< 8	< 32	4	4	0.5	< 0.25	< 16	< 0.12	4	8	< 0.015	2	< 4
140	Escherichia	coli	375	2009	Animal feed	Poultry feed	4	1	< 8	< 32	4	4	0.5	< 0.25	< 16	< 0.12	2	8	< 0.015	2	< 4
141	Escherichia	coli	375	2009	Animal feed	Poultry feed	4	1	< 8	< 32	4	4	0.5	< 0.25	< 16	< 0.12	4	8	< 0.015	1	< 4
142	Escherichia	coli	376	2009	Pet food	Pet food/treat	4	1	< 8	> 64		4	0.5	< 0.25	< 16	< 0.12	2	8	< 0.015	4	> 32
144	Escherichia	coli	476	2009	Animal feed	Ingredient	2	0.5	< 8	< 32	4	8	0.5	< 0.25	64	< 0.12	2	4	< 0.015	2	< 4
145	Escherichia	coli	476	2009	Animal feed	Ingredient	4	1	< 8	< 32	4	4	0.5	< 0.25	128	< 0.12	2	8	< 0.015	2	< 4
146	Escherichia	coli	476	2009	Animal feed	Ingredient	2	0.5	< 8	< 32	4	8	0.5	< 0.25	32	< 0.12	2	4	< 0.015	1	< 4
147	Escherichia	coli	476	2009	Animal feed	Ingredient	2	0.5	< 8	< 32	4	8	0.5	< 0.25	64	< 0.12	2	4	< 0.015	1	< 4
149	Escherichia	coli	498	2009	Animal feed	Cattle feed	1	0.5	< 8	< 32	4	2	0.25	< 0.25	32	< 0.12	2	8	< 0.015	2	< 4
151	Escherichia	coli	498	2009	Animal feed	Cattle feed	1	< 0.25	< 8	< 32	4	2	0.5	< 0.25	32	< 0.12	2	8	< 0.015	2	< 4
152	Escherichia	coli	499	2009	Animal feed	Poultry feed	1	0.5	< 8	< 32	4	4	0.5	< 0.25	< 16	< 0.12	4	8	< 0.015	2	< 4
153	Escherichia	coli	499	2009	Animal feed	Poultry feed	2	0.5	< 8	< 32	4	4	0.5	< 0.25	< 16	< 0.12	4	8	< 0.015	4	< 4
154	Escherichia	coli	550	2009	Animal feed	Animal feed (for unspecified animal species)	2	0.5	< 8	< 32	4	4	0.5	< 0.25	< 16	< 0.12	4	8	< 0.015	2	< 4
155	Escherichia	coli	550	2009	Animal feed	Animal feed (for unspecified animal species)	1	0.5	< 8	< 32	4	4	0.5	< 0.25	< 16	< 0.12	2	8	< 0.015	2	< 4
156	Escherichia	coli	550	2009	Animal feed	Animal feed (for unspecified animal species)	2	0.5	< 8	< 32	4	4	0.25	< 0.25	< 16	< 0.12	2	4	< 0.015	2	< 4
163	Escherichia	coli	614	2009	Pet food	Pet food/treat	1	0.5	< 8	< 32	4	4	0.25	< 0.25	< 16	< 0.12	2	4	< 0.015	2	< 4
164	Escherichia	coli	614	2009	Pet food	Pet food/treat	2	0.5	< 8	< 32	4	4	0.25	< 0.25	< 16	< 0.12	2	8	< 0.015	4	< 4
165	Escherichia	coli	619	2010	Animal feed	Ingredient	2	0.5	< 8	< 32	4	4	0.25	< 0.25	< 16	< 0.12	2	8	< 0.015	2	< 4
166	Escherichia	coli	619	2010	Animal feed	Ingredient	2	0.5	< 8	< 32	4	4	0.25	< 0.25	< 16	< 0.12	2	4	< 0.015	2	< 4
167	Escherichia	coli	640	2010	Pet food	Supplement for pets	2	0.5	< 8	< 32	8	4	0.5	< 0.25	< 16	< 0.12	4	8	< 0.015	2	< 4
168	Escherichia	coli	640	2010	Pet food	Supplement for pets	2	0.5	< 8	< 32	8	4	0.5	< 0.25	64	< 0.12	4	8	< 0.015	2	< 4
169	Escherichia	coli	646	2010	Animal feed	Animal feed (for unspecified animal species)	2	0.5	< 8	< 32	4	4	0.5	< 0.25	32	< 0.12	4	4	< 0.015	2	< 4
170	Escherichia	coli	651	2010	Animal feed	Ingredient	1	0.5	< 8	< 32	4	4	0.5	< 0.25	< 16	< 0.12	4	8	< 0.015	2	< 4
171	Escherichia	coli	651	2010	Animal feed	Ingredient	2	0.5	< 8	< 32	2	4	0.5	< 0.25	< 16	< 0.12	2	8	< 0.015	1	< 4
172	Escherichia	coli	665	2010	Pet food	Pet food/treat	2	1	< 8	< 32	4	4	0.5	< 0.25	< 16	< 0.12	2	8	< 0.015	2	< 4
173	Escherichia	coli	665	2010	Pet food	Pet food/treat	4	1	< 8	< 32	4	4	0.5	< 0.25	< 16	< 0.12	2	8	< 0.015	2	< 4
174	Escherichia	coli	665	2010	Pet food	Pet food/treat	4	0.5	< 8	< 32	4	4	0.5	< 0.25	< 16	< 0.12	2	8	< 0.015	2	< 4
175	Escherichia	coli	665	2010	Pet food	Pet food/treat	4	1	< 8	< 32	2	2	0.25	< 0.25	< 16	< 0.12	2	4	< 0.015	1	< 4
176	Escherichia	coli	690	2010	Pet food	Pet food/treat	1	< 0.25	< 8	< 32	2	4	0.25	< 0.25	32	< 0.12	2	8	< 0.015	2	< 4
177	Escherichia	coli	692	2010	Animal feed	Cattle feed	2	0.5	< 8	< 32	4	4	0.5	< 0.25	32	< 0.12	2	4	< 0.015	2	< 4
178	Escherichia	coli	692	2010	Animal feed	Cattle feed	2	0.5	< 8	< 32	4	4	0.5	< 0.25	32	< 0.12	2	8	< 0.015	2	< 4
179	Escherichia	coli	739	2010	Animal feed	Animal feed (for unspecified animal species)	1	< 0.25	< 8	< 32	2	4	0.5	< 0.25	< 16	< 0.12	2	8	< 0.015	2	< 4
180	Escherichia	coli	744	2010	Pet food	Supplement for pets	2	0.5	< 8	< 32	4	4	0.5	< 0.25	< 16	< 0.12	4	8	< 0.015	2	< 4
181	Escherichia	coli	744	2010	Pet food	Supplement for pets	1	< 0.25	< 8	< 32	8	4	0.5	< 0.25	32	< 0.12	4	8	< 0.015	2	< 4
182	Escherichia	coli	765	2010	Animal feed	Cattle feed	4	1	< 8	< 32	4	4	0.5	< 0.25	< 16	< 0.12	4	8	< 0.015	2	< 4
183	Escherichia	coli	765	2010	Animal feed	Cattle feed	4	1	< 8	< 32	4	4	0.5	< 0.25	< 16	< 0.12	4	8	< 0.015	2	< 4
184	Escherichia	coli	765	2010	Animal feed	Cattle feed	2	1	< 8	< 32	2	4	0.5	< 0.25	< 16	< 0.12	2	8	< 0.015	2	> 32
185	Escherichia	coli	765	2010	Animal feed	Cattle feed	2	0.5	< 8	< 32	2	2	0.5	< 0.25	< 16	< 0.12	2	8	< 0.015	2	> 32
186	Escherichia	coli	768	2010	Animal feed	Cattle feed	2	0.5	< 8	< 32	2	2	0.25	< 0.25	< 16	< 0.12	2	4	< 0.015	1	< 4
187	Escherichia	coli	768	2010	Animal feed	Cattle feed	2	1	< 8	< 32	2	2	0.25	< 0.25	< 16	< 0.12	2	4	< 0.015	1	< 4
188	Escherichia	coli	768	2010	Animal feed	Cattle feed	4	0.5	< 8	< 32	2	4	0.25	< 0.25	< 16	< 0.12	2	8	< 0.015	2	< 4
189	Escherichia	coli	768	2010	Animal feed	Cattle feed	4	0.5	< 8	< 32	2	4	0.5	< 0.25	< 16	< 0.12	2	8	< 0.015	2	< 4
190	Escherichia	coli	769	2010	Animal feed	Animal feed (for unspecified animal species)	4	1	< 8	< 32	4	8	0.5	< 0.25	< 16	< 0.12	4	8	< 0.015	2	< 4
191	Escherichia	coli	769	2010	Animal feed	Animal feed (for unspecified animal species)	8	1	< 8	< 32	4	8	0.5	< 0.25	< 16	< 0.12	2	8	< 0.015	4	< 4
192	Escherichia	coli	791	2010	Animal feed	Cattle feed	2	1	< 8	< 32	4	4	0.25	< 0.25	< 16	< 0.12	2	4	< 0.015	2	< 4
193	Escherichia	coli	791	2010	Animal feed	Cattle feed	1	< 0.25	< 8	< 32	2	4	0.25	< 0.25	< 16	< 0.12	2	4	< 0.015	2	< 4
194	Escherichia	coli	799	2010	Animal feed	Poultry feed	1	< 0.25	< 8	< 32	4	8	0.5	< 0.25	< 16	< 0.12	4	4	< 0.015	2	< 4
195	Escherichia	coli	801	2010	Animal feed	Cattle feed	2	0.5	< 8	< 32	2	2	0.25	< 0.25	> 256	0.25	2	4	< 0.015	2	32
196	Escherichia	coli	802	2010	Animal feed	Cattle feed	2	0.5	< 8	< 32	4	4	0.25	< 0.25	32	< 0.12	> 32	4	< 0.015	2	> 32
197	Escherichia	coli	802	2010	Animal feed	Cattle feed	1	< 0.25	< 8	< 32	4	4	0.25	< 0.25	< 16	< 0.12	2	8	< 0.015	4	> 32
198	Escherichia	coli	803	2010	Animal feed	Cattle feed	2	0.5	< 8	< 32	4	4	0.25	< 0.25	< 16	< 0.12	2	4	< 0.015	2	< 4
199	Escherichia	coli	803	2010	Animal feed	Cattle feed	2	0.5	< 8	< 32	2	2	0.25	< 0.25	< 16	< 0.12	2	4	< 0.015	2	< 4
200	Escherichia	coli	806	2010	Animal feed	Ingredient	4	0.5	< 8	< 32	4	8	0.5	< 0.25	32	< 0.12	4	8	< 0.015	2	< 4
201	Escherichia	coli	806	2010	Animal feed	Ingredient	2	0.5	< 8	< 32	4	8	0.5	< 0.25	< 16	< 0.12	4	8	< 0.015	2	< 4
202	Escherichia	coli	808	2010	Animal feed	Ingredient	2	0.5	< 8	< 32	4	8	0.5	< 0.25	< 16	< 0.12	4	8	< 0.015	4	< 4
203	Escherichia	coli	810	2010	Animal feed	Ingredient	2	0.5	< 8	< 32	4	4	0.5	< 0.25	32	< 0.12	2	8	< 0.015	2	< 4
204	Escherichia	coli	812	2010	Animal feed	Ingredient	2	0.5	< 8	< 32	4	4	0.5	< 0.25	32	< 0.12	4	8	< 0.015	2	< 4
205	Escherichia	coli	812	2010	Animal feed	Ingredient	2	0.5	< 8	< 32	2	8	0.25	< 0.25	32	< 0.12	< 1	4	< 0.015	2	< 4
206	Escherichia	coli	813	2010	Animal feed	Ingredient	1	< 0.25	< 8	< 32	4	8	0.5	< 0.25	32	< 0.12	4	8	< 0.015	2	< 4
207	Escherichia	coli	814	2010	Pet food	Pet food/treat	2	0.5	< 8	< 32	4	4	0.5	< 0.25	32	< 0.12	2	8	< 0.015	2	< 4
208	Escherichia	coli	814	2010	Pet food	Pet food/treat	2	0.5	< 8	< 32		8	0.25	< 0.25	32	< 0.12	< 1	8	< 0.015	2	< 4
209	Escherichia	coli	815	2010	Pet food	Pet food/treat	2	0.5	< 8	< 32	4	8	0.5	< 0.25	32	< 0.12	2	8	< 0.015	4	< 4
210	Escherichia	coli	815	2010	Pet food	Pet food/treat	2	0.5	< 8	< 32	4	2	0.25	< 0.25	64	< 0.12	2	8	< 0.015	2	< 4
211	Escherichia	coli	818	2010	Pet food	Pet food/treat	2	0.5	< 8	< 32	4	4	0.5	< 0.25	32	< 0.12	2	8	< 0.015	2	< 4
212	Escherichia	coli	819	2010	Animal feed	Ingredient	2	0.5	< 8	< 32	4	4	0.25	< 0.25	< 16	< 0.12	2	8	< 0.015	2	< 4
213	Escherichia	coli	819	2010	Animal feed	Ingredient	4	0.5	< 8	< 32	2	1	0.25	< 0.25	32	< 0.12	< 1	4	< 0.015	2	< 4
214	Escherichia	coli	820	2010	Animal feed	Ingredient	2	0.5	< 8	< 32	4	4	0.5	< 0.25	32	< 0.12	4	8	< 0.015	2	< 4
215	Escherichia	coli	820	2010	Animal feed	Ingredient	2	0.5	< 8	< 32	4	4	1	< 0.25	< 16	< 0.12	4	8	< 0.015	2	< 4
216	Escherichia	coli	824	2010	Animal feed	Cattle feed	2	0.5	< 8	< 32	4	2	0.25	< 0.25	< 16	< 0.12	2	8	< 0.015	2	< 4
217	Escherichia	coli	830	2010	Animal feed	Cattle feed	2	0.5	< 8	< 32	8	4	0.25	< 0.25	32	< 0.12	4	8	< 0.015	2	< 4
218	Escherichia	coli	831	2010	Animal feed	Cattle feed	2	0.5	< 8	< 32	4	8	0.5	< 0.25	32	< 0.12	4	8	< 0.015	4	< 4
219	Escherichia	coli	846	2010	Animal feed	Cattle feed	4	1	< 8	< 32	4	4	0.5	< 0.25	< 16	< 0.12	4	8	< 0.015	2	< 4
220	Escherichia	coli	846	2010	Animal feed	Cattle feed	4	1	< 8	< 32	4	4	0.5	< 0.25	< 16	< 0.12	4	4	< 0.015	2	< 4
221	Escherichia	coli	846	2010	Animal feed	Cattle feed	4	1	< 8	< 32	4	2	0.25	< 0.25	< 16	< 0.12	2	8	< 0.015	2	< 4
222	Escherichia	coli	846	2010	Animal feed	Cattle feed	4	0.5	< 8	< 32	4	4	0.25	< 0.25	< 16	< 0.12	2	8	< 0.015	4	< 4
223	Escherichia	coli	852	2010	Animal feed	Animal feed (for unspecified animal species)	4	1	< 8	> 64	8	8	0.5	< 0.25	> 256	> 4	> 32	8	< 0.015	4	> 32
224	Escherichia	coli	852	2010	Animal feed	Animal feed (for unspecified animal species)	4	1	< 8	> 64	8	4	0.5	< 0.25	> 256	> 4	> 32	4	< 0.015	4	> 32
225	Escherichia	coli	852	2010	Animal feed	Animal feed (for unspecified animal species)	4	1	< 8	< 32	4	4	0.5	< 0.25	< 16	< 0.12	4	8	< 0.015	4	< 4
226	Escherichia	coli	852	2010	Animal feed	Animal feed (for unspecified animal species)	4	1	< 8	< 32	4	2	0.5	< 0.25	< 16	< 0.12	4	8	< 0.015	2	< 4
227	Escherichia	coli	853	2010	Animal feed	Cattle feed	4	1	< 8	< 32	2	4	0.5	< 0.25	< 16	< 0.12	2	8	< 0.015	2	< 4
228	Escherichia	coli	853	2010	Animal feed	Cattle feed	4	1	< 8	< 32	2	4	0.5	< 0.25	< 16	< 0.12	4	8	< 0.015	2	< 4
229	Escherichia	coli	853	2010	Animal feed	Cattle feed	4	0.5	< 8	< 32	4	4	0.5	< 0.25	< 16	< 0.12	4	8	< 0.015	4	< 4
230	Escherichia	coli	853	2010	Animal feed	Cattle feed	4	1	< 8	< 32	4	4	0.5	< 0.25	< 16	< 0.12	4	8	< 0.015	4	< 4
231	Escherichia	coli	859	2010	Animal feed	Cattle feed	4	0.5	< 8	< 32	4	4	0.5	< 0.25	32	< 0.12	4	8	< 0.015	2	< 4
232	Escherichia	coli	868	2010	Animal feed	Swine feed	2	1	< 8	< 32	4	4	0.5	< 0.25	32	< 0.12	4	8	< 0.015	2	< 4
233	Escherichia	coli	871	2010	Animal feed	Poultry feed	4	0.5	< 8	< 32	8	4	0.5	< 0.25	32	< 0.12	4	8	< 0.015	4	< 4
234	Escherichia	coli	871	2010	Animal feed	Poultry feed	4	0.5	< 8	< 32	4	4	0.5	< 0.25	< 16	< 0.12	4	8	< 0.015	2	< 4
235	Escherichia	coli	872	2010	Animal feed	Poultry feed	2	0.5	< 8	< 32	4	4	0.5	< 0.25	< 16	< 0.12	4	8	< 0.015	2	< 4
236	Escherichia	coli	872	2010	Animal feed	Poultry feed	4	1	< 8	< 32	4	4	0.5	< 0.25	< 16	< 0.12	4	8	< 0.015	2	< 4
237	Escherichia	coli	872	2010	Animal feed	Poultry feed	4	1	< 8	< 32	4	8	0.5	< 0.25	< 16	< 0.12	4	8	< 0.015	4	< 4
238	Escherichia	coli	872	2010	Animal feed	Poultry feed	4	1	< 8	< 32	8	8	0.5	< 0.25	< 16	< 0.12	4	16	< 0.015	4	< 4
239	Escherichia	coli	873	2010	Animal feed	Feed for minor species	4	1	< 8	< 32	4	4	0.25	< 0.25	< 16	< 0.12	2	8	< 0.015	2	< 4
240	Escherichia	coli	873	2010	Animal feed	Feed for minor species	4	1	< 8	< 32	2	2	0.5	< 0.25	< 16	< 0.12	2	8	< 0.015	2	< 4
241	Escherichia	coli	873	2010	Animal feed	Feed for minor species	4	1	< 8	< 32	4	4	0.5	< 0.25	< 16	< 0.12	4	4	< 0.015	2	< 4
242	Escherichia	coli	873	2010	Animal feed	Feed for minor species	4	1	< 8	< 32	4	4	0.5	< 0.25	< 16	< 0.12	4	4	< 0.015	2	< 4
243	Escherichia	coli	878	2010	Animal feed	Ingredient	4	1	< 8	< 32	4	4	0.5	< 0.25	< 16	< 0.12	2	8	< 0.015	2	< 4
244	Escherichia	coli	878	2010	Animal feed	Ingredient	2	1	< 8	< 32	4	4	0.5	< 0.25	< 16	< 0.12	2	4	< 0.015	2	< 4
245	Escherichia	coli	878	2010	Animal feed	Ingredient	4	1	< 8	< 32	4	4	0.5	< 0.25	< 16	< 0.12	4	4	< 0.015	2	< 4
246	Escherichia	coli	889	2010	Animal feed	Cattle feed	4	2	< 8	< 32	4	4	0.5	< 0.25	< 16	< 0.12	2	8	< 0.015	4	< 4
247	Escherichia	coli	889	2010	Animal feed	Cattle feed	4	4	< 8	< 32	4	4	0.5	< 0.25	< 16	< 0.12	2	8	< 0.015	2	< 4
248	Escherichia	coli	889	2010	Animal feed	Cattle feed	4	1	< 8	< 32	4	4	0.5	< 0.25	< 16	< 0.12	4	8	< 0.015	4	< 4
249	Escherichia	coli	889	2010	Animal feed	Cattle feed	4	1	< 8	< 32	4	4	0.5	< 0.25	< 16	< 0.12	4	8	< 0.015	2	< 4
250	Escherichia	coli	892	2010	Animal feed	Animal feed (for unspecified animal species)	4	1	< 8	< 32	2	4	0.25	< 0.25	< 16	< 0.12	2	8	< 0.015	2	< 4
251	Escherichia	coli	892	2010	Animal feed	Animal feed (for unspecified animal species)	4	1	< 8	< 32	4	4	0.5	< 0.25	< 16	< 0.12	2	8	< 0.015	2	< 4
252	Escherichia	coli	892	2010	Animal feed	Animal feed (for unspecified animal species)	2	0.5	< 8	< 32	4	4	0.5	< 0.25	< 16	< 0.12	4	4	< 0.015	2	< 4
253	Escherichia	coli	892	2010	Animal feed	Animal feed (for unspecified animal species)	2	0.5	< 8	< 32	4	4	0.5	< 0.25	< 16	< 0.12	4	4	< 0.015	2	< 4
254	Escherichia	coli	917	2010	Animal feed	Animal feed (for unspecified animal species)	1	0.5	< 8	< 32	2	2	0.25	< 0.25	32	< 0.12	2	8	< 0.015	2	< 4
255	Escherichia	coli	917	2010	Animal feed	Animal feed (for unspecified animal species)	2	1	< 8	< 32	4	4	0.5	< 0.25	< 16	< 0.12	4	8	< 0.015	2	< 4
256	Escherichia	coli	918	2010	Animal feed	Ingredient	1	1	< 8	64	4	4	0.5	< 0.25	> 256	0.5	4	8	< 0.015	2	> 32
257	Escherichia	coli	918	2010	Animal feed	Ingredient	2	0.5	< 8	< 32	4	2	0.25	< 0.25	< 16	< 0.12	4	8	< 0.015	1	< 4
258	Escherichia	coli	921	2010	Animal feed	Ingredient	4	0.5	< 8	< 32	4	4	0.5	< 0.25	< 16	< 0.12	4	8	< 0.015	4	< 4
259	Escherichia	coli	923	2010	Animal feed	Ingredient	2	0.5	< 8	< 32	4	2	0.25	< 0.25	32	< 0.12	2	4	< 0.015	2	> 32
260	Escherichia	coli	923	2010	Animal feed	Ingredient	4	0.5	< 8	< 32	4	2	0.25	< 0.25	32	< 0.12	2	4	< 0.015	2	< 4
262	Escherichia	coli	930	2010	Animal feed	Animal feed (for unspecified animal species)	2	0.5	< 8	< 32	4	4	0.5	< 0.25	< 16	< 0.12	4	8	< 0.015	4	< 4
263	Escherichia	coli	933	2010	Animal feed	Ingredient	2	0.5	< 8	< 32	4	4	0.25	< 0.25	< 16	< 0.12	4	8	< 0.015	2	> 32
264	Escherichia	coli	933	2010	Animal feed	Ingredient	4	0.5	< 8	> 64	8	4	0.25	< 0.25	< 16	< 0.12	> 32	8	< 0.015	2	> 32
265	Escherichia	coli	951	2010	Animal feed	Poultry feed	4	1	< 8	< 32	4	4	0.5	< 0.25	< 16	< 0.12	4	8	< 0.015	2	< 4
266	Escherichia	coli	951	2010	Animal feed	Poultry feed	4	1	< 8	< 32	4	4	0.5	< 0.25	< 16	< 0.12	4	8	< 0.015	2	< 4
267	Escherichia	coli	957	2010	Animal feed	Poultry feed	4	1	< 8	< 32	16	4	0.5	< 0.25	< 16	< 0.12	4	4	< 0.015	2	< 4
268	Escherichia	coli	962	2010	Animal feed	Poultry feed	4	1	< 8	< 32	4	4	0.5	< 0.25	< 16	< 0.12	4	8	< 0.015	2	> 32
269	Escherichia	coli	962	2010	Animal feed	Poultry feed	2	1	< 8	< 32	4	4	0.25	< 0.25	< 16	< 0.12	2	4	< 0.015	2	> 32
270	Escherichia	coli	964	2010	Animal feed	Ingredient	4	1	< 8	< 32		4	0.5	< 0.25	< 16	< 0.12	2	8	< 0.015	2	< 4
271	Escherichia	coli	964	2010	Animal feed	Ingredient	4	1	< 8	< 32	4	4	0.5	< 0.25	32	< 0.12	4	8	< 0.015	2	< 4
272	Escherichia	coli	974	2010	Animal feed	Poultry feed	4	0.5	< 8	< 32	4	4	0.25	< 0.25	< 16	< 0.12	4	8	< 0.015	2	< 4
273	Escherichia	coli	978	2010	Animal feed	Animal feed (for unspecified animal species)	4	1	< 8	< 32	4	2	0.5	< 0.25	< 16	< 0.12	2	8	0.03	2	< 4
274	Escherichia	coli	995	2010	Animal feed	Cattle feed	4	1	< 8	< 32	4	4	0.25	< 0.25	< 16	< 0.12	4	8	< 0.015	1	< 4
275	Escherichia	coli	996	2010	Animal feed	Cattle feed	4	1	> 64	> 64	8	4	0.25	< 0.25	> 256	0.25	4	8	< 0.015	2	> 32
276	Escherichia	coli	997	2010	Animal feed	Animal feed (for unspecified animal species)	4	1	< 8	< 32	4	4	0.5	< 0.25	< 16	< 0.12	4	4	< 0.015	2	< 4
277	Escherichia	coli	1026	2010	Animal feed	Poultry feed	4	1	< 8	< 32	4	4	0.5	< 0.25	< 16	< 0.12	4	4	< 0.015	4	< 4
278	Escherichia	coli	1032	2011	Animal feed	Ingredient	4	1	< 8	< 32	8	4	0.5	< 0.25	< 16	< 0.12	4	4	< 0.015	2	< 4
279	Escherichia	coli	1040	2011	Pet food	Pet food/treat	2	0.5	< 8	< 32	4	4	0.5	< 0.25	< 16	< 0.12	4	8	< 0.015	2	< 4
280	Escherichia	coli	1040	2011	Pet food	Pet food/treat	4	1	< 8	< 32	4	2	0.25	< 0.25	< 16	< 0.12	2	4	< 0.015	2	< 4
281	Escherichia	coli	1056	2011	Pet food	Pet food/treat	2	1	< 8	< 32	4	4	0.5	< 0.25	< 16	< 0.12	4	8	< 0.015	2	< 4
282	Escherichia	coli	1057	2011	Pet food	Pet food/treat	4	4	< 8	> 64	4	4	0.5	< 0.25	< 16	< 0.12	4	8	< 0.015	2	> 32
283	Escherichia	coli	1061	2011	Pet food	Pet food/treat	4	1	< 8	< 32	8	4	0.5	< 0.25	< 16	< 0.12	4	8	< 0.015	4	< 4
284	Escherichia	coli	1069	2011	Animal feed	Cattle feed	4	0.5	< 8	< 32	2	4	0.5	< 0.25	< 16	< 0.12	2	4	< 0.015	2	< 4
285	Escherichia	coli	1069	2011	Animal feed	Cattle feed	4	1	< 8	< 32	4	4	0.5	< 0.25	< 16	< 0.12	2	8	< 0.015	2	32
286	Escherichia	coli	1088	2011	Animal feed	Ingredient	n/a	0.5	n/a	4	4	4	0.25	< 0.25	< 16	< 0.12	4	4	< 0.015	2	< 4
287	Escherichia	coli	1089	2011	Animal feed	Cattle feed	n/a	0.5	n/a	4	4	2	0.25	< 0.25	< 16	< 0.12	2	4	< 0.015	2	8

## Sheet: Table_S1_Enterococcus
Isolate ID	Genus	Species	Sample ID	Year	Feed Category	Feed Type	Gentamicin	Kanamycin	Streptomycin	Vancomycin	Tigecycline	Daptomycin	Erythromycin	Tylosin	Nitrofurantoin	Linezolid	Penicillin	Chloramphenicol	Ciprofloxacin	Quinupristin/Dalfopristin	Tetracycline
1	Enterococcus	faecium	1	2005	Animal feed	Swine feed	<=128	512	<=512	1	0.12	2	8	8	64	2	4	4	2	2	<=4
2	Enterococcus	faecium	1	2005	Animal feed	Swine feed	<=128	256	<=512	<=0.5	0.06	4	<=0.5	8	64	2	1	8	2	2	<=4
3	Enterococcus	faecium	2	2005	Animal feed	Swine feed	<=128	<=128	<=512	<=0.5	0.12	1	<=0.5	8	64	2	4	4	2	2	<=4
4	Enterococcus	faecium	3	2005	Animal feed	Swine feed	<=128	256	<=512	<=0.5	0.12	2	<=0.5	4	64	2	<=0.5	4	1	1	>32
5	Enterococcus	faecium	3	2005	Animal feed	Swine feed	<=128	<=128	1024	<=0.5	0.06	1	>8	>32	64	2	4	32	1	4	>32
6	Enterococcus	faecium	4	2005	Animal feed	Cattle feed	<=128	256	<=512	<=0.5	0.06	1	4	4	64	2	4	8	1	2	<=4
7	Enterococcus	casseliflavus	4	2005	Animal feed	Cattle feed	<=128	<=128	<=512	4	0.06	<=0.5	1	1	32	2	<=0.5	8	1	2	<=4
8	Enterococcus	faecium	4	2005	Animal feed	Cattle feed	<=128	256	1024	<=0.5	0.25	1	4	4	64	2	8	4	0.5	2	>32
9	Enterococcus	faecium	5	2006	Animal feed	Poultry feed	<=128	512	<=512	1	0.06	2	8	4	>64	2	4	8	1	2	<=4
10	Enterococcus	faecium	6	2006	Animal feed	Swine feed	<=128	<=128	<=512	<=0.5	0.12	2	4	4	64	2	4	4	2	2	<=4
11	Enterococcus	faecium	6	2006	Animal feed	Swine feed	<=128	512	<=512	1	0.12	2	<=0.5	8	64	2	4	8	1	2	<=4
12	Enterococcus	faecium	7	2006	Animal feed	Poultry feed	<=128	256	<=512	<=0.5	0.12	4	4	8	64	2	4	8	1	2	>32
13	Enterococcus	faecium	7	2006	Animal feed	Poultry feed	<=128	256	<=512	<=0.5	0.06	2	2	8	64	2	2	4	2	2	<=4
14	Enterococcus	faecium	7	2006	Animal feed	Poultry feed	<=128	<=128	<=512	<=0.5	0.12	<=0.5	<=0.5	8	64	2	4	8	2	2	<=4
15	Enterococcus	faecium	8	2006	Animal feed	Poultry feed	<=128	256	<=512	<=0.5	0.12	2	<=0.5	8	64	2	4	8	2	2	<=4
16	Enterococcus	faecium	8	2006	Animal feed	Poultry feed	<=128	256	<=512	<=0.5	0.06	2	<=0.5	4	64	2	4	4	1	2	<=4
17	Enterococcus	faecium	9	2006	Animal feed	Ingredient	<=128	256	<=512	<=0.5	0.12	2	<=0.5	8	64	2	4	4	1	2	>32
18	Enterococcus	faecium	9	2006	Animal feed	Ingredient	<=128	<=128	<=512	2	0.12	1	1	4	64	2	<=0.5	4	>4	1	<=4
19	Enterococcus	faecium	9	2006	Animal feed	Ingredient	<=128	<=128	<=512	<=0.5	0.25	4	2	8	64	2	<=0.5	8	1	2	<=4
20	Enterococcus	faecium	9	2006	Animal feed	Ingredient	<=128	<=128	<=512	1	0.06	2	2	1	64	2	1	8	4	1	<=4
21	Enterococcus	faecium	10	2006	Animal feed	Poultry feed	<=128	<=128	<=512	<=0.5	0.12	2	2	4	64	2	1	4	1	2	>32
22	Enterococcus	faecium	10	2006	Animal feed	Poultry feed	<=128	256	<=512	<=0.5	0.12	2	>8	>32	64	2	2	8	2	8	>32
23	Enterococcus	faecium	11	2006	Animal feed	Ingredient	<=128	<=128	<=512	<=0.5	0.12	2	4	4	>64	2	2	4	1	2	<=4
24	Enterococcus	faecium	11	2006	Animal feed	Ingredient	<=128	<=128	<=512	<=0.5	0.06	1	<=0.5	8	64	2	1	4	1	2	<=4
25	Enterococcus	faecium	12	2006	Animal feed	Cattle feed	<=128	<=128	<=512	<=0.5	0.12	2	4	4	64	2	2	4	0.25	2	>32
26	Enterococcus	faecium	12	2006	Animal feed	Cattle feed	<=128	<=128	<=512	2	0.06	2	<=0.5	1	64	2	<=0.5	8	4	1	16
27	Enterococcus	faecium	12	2006	Animal feed	Cattle feed	<=128	<=128	<=512	2	0.12	2	4	8	64	2	2	8	2	2	16
28	Enterococcus	faecium	13	2006	Animal feed	Swine feed	<=128	<=128	<=512	<=0.5	0.12	<=0.5	2	1	64	2	2	8	2	1	<=4
29	Enterococcus	faecium	13	2006	Animal feed	Swine feed	<=128	<=128	<=512	<=0.5	0.06	1	2	1	64	2	8	8	1	1	<=4
30	Enterococcus	faecium	14	2006	Animal feed	Cattle feed	<=128	<=128	<=512	<=0.5	0.12	1	4	8	64	2	4	4	1	2	<=4
31	Enterococcus	faecium	14	2006	Animal feed	Cattle feed	<=128	<=128	<=512	<=0.5	0.12	1	<=0.5	8	64	2	4	8	1	2	<=4
32	Enterococcus	faecium	14	2006	Animal feed	Cattle feed	<=128	256	<=512	1	0.06	2	<=0.5	8	64	2	8	4	1	2	<=4
33	Enterococcus	faecium	14	2006	Animal feed	Cattle feed	<=128	<=128	<=512	<=0.5	0.06	1	4	4	64	2	2	4	1	2	>32
34	Enterococcus	faecium	15	2006	Animal feed	Ingredient	<=128	256	<=512	<=0.5	0.12	2	<=0.5	8	64	4	2	8	1	2	<=4
35	Enterococcus	faecium	15	2006	Animal feed	Ingredient	<=128	256	<=512	<=0.5	0.12	1	4	4	64	2	2	4	2	2	<=4
36	Enterococcus	faecium	15	2006	Animal feed	Ingredient	<=128	256	<=512	<=0.5	0.06	2	2	4	64	2	4	8	2	2	<=4
37	Enterococcus	faecium	16	2006	Animal feed	Animal feed (for unspecified animal species)	<=128	256	<=512	<=0.5	0.12	1	4	4	64	2	4	8	1	2	>32
38	Enterococcus	faecium	16	2006	Animal feed	Animal feed (for unspecified animal species)	<=128	512	<=512	<=0.5	0.12	1	<=0.5	8	64	2	4	8	2	2	<=4
39	Enterococcus	faecalis	17	2006	Animal feed	Animal feed (for unspecified animal species)	<=128	<=128	<=512	1	0.25	1	1	1	16	2	4	8	1	4	<=4
40	Enterococcus	faecium	17	2006	Animal feed	Animal feed (for unspecified animal species)	<=128	<=128	<=512	1	0.12	1	2	2	8	2	4	8	1	4	<=4
41	Enterococcus	faecium	17	2006	Animal feed	Animal feed (for unspecified animal species)	<=128	<=128	<=512	<=0.5	0.25	1	<=0.5	4	32	2	1	8	2	2	<=4
42	Enterococcus	faecium	17	2006	Animal feed	Animal feed (for unspecified animal species)	<=128	<=128	<=512	<=0.5	0.25	2	<=0.5	4	64	2	2	8	1	2	<=4
43	Enterococcus	faecium	18	2006	Animal feed	Ingredient	<=128	256	<=512	<=0.5	0.12	1	8	4	64	2	2	8	1	2	<=4
44	Enterococcus	faecium	18	2006	Animal feed	Ingredient	<=128	<=128	<=512	<=0.5	0.06	2	4	4	64	2	2	8	1	2	<=4
45	Enterococcus	faecium	18	2006	Animal feed	Ingredient	<=128	256	<=512	<=0.5	0.12	1	<=0.5	8	>64	2	4	8	2	2	<=4
46	Enterococcus	faecium	18	2006	Animal feed	Ingredient	<=128	256	<=512	<=0.5	0.25	2	<=0.5	8	64	2	2	8	2	2	<=4
47	Enterococcus	faecium	19	2006	Animal feed	Ingredient	<=128	256	<=512	<=0.5	0.06	2	2	4	64	2	4	8	1	2	<=4
48	Enterococcus	faecium	19	2006	Animal feed	Ingredient	<=128	512	<=512	<=0.5	0.06	2	4	8	64	2	4	8	1	2	<=4
49	Enterococcus	faecium	19	2006	Animal feed	Ingredient	<=128	256	<=512	<=0.5	0.25	1	2	8	64	2	4	8	1	2	<=4
50	Enterococcus	faecium	20	2006	Animal feed	Cattle feed	<=128	<=128	<=512	<=0.5	0.06	2	2	8	64	2	4	8	0.5	2	<=4
51	Enterococcus	faecium	20	2006	Animal feed	Cattle feed	<=128	256	<=512	<=0.5	0.06	2	4	8	64	2	4	8	2	1	<=4
52	Enterococcus	faecium	21	2006	Animal feed	Poultry feed	<=128	<=128	<=512	<=0.5	0.06	2	2	8	64	2	4	8	0.5	2	<=4
53	Enterococcus	faecium	21	2006	Animal feed	Poultry feed	<=128	<=128	<=512	<=0.5	0.06	1	<=0.5	4	>64	2	4	8	1	2	<=4
54	Enterococcus	faecium	22	2006	Animal feed	Poultry feed	<=128	256	<=512	<=0.5	0.25	1	4	8	64	2	4	8	2	2	<=4
55	Enterococcus	faecium	22	2006	Animal feed	Poultry feed	<=128	256	<=512	<=0.5	0.06	2	2	1	64	4	4	8	1	1	<=4
56	Enterococcus	faecium	22	2006	Animal feed	Poultry feed	<=128	256	<=512	<=0.5	0.12	2	2	1	64	2	4	8	1	1	<=4
57	Enterococcus	faecium	23	2006	Animal feed	Poultry feed	<=128	512	<=512	1	0.25	2	4	8	64	2	2	8	2	2	<=4
58	Enterococcus	faecium	23	2006	Animal feed	Poultry feed	<=128	256	<=512	1	0.06	2	4	8	64	2	2	8	1	2	<=4
59	Enterococcus	faecium	24	2006	Animal feed	Ingredient	<=128	512	<=512	1	0.25	2	2	2	64	2	4	8	>4	1	>32
60	Enterococcus	faecium	24	2006	Animal feed	Ingredient	<=128	256	<=512	<=0.5	0.12	1	<=0.5	8	64	2	2	8	1	4	<=4
61	Enterococcus	faecium	25	2006	Animal feed	Cattle feed	<=128	512	<=512	<=0.5	0.12	2	2	8	64	2	2	8	0.5	2	>32
62	Enterococcus	faecium	25	2006	Animal feed	Cattle feed	<=128	512	<=512	<=0.5	0.06	2	<=0.5	1	64	2	4	8	1	1	<=4
63	Enterococcus	faecium	25	2006	Animal feed	Cattle feed	<=128	256	<=512	<=0.5	0.06	2	<=0.5	4	64	2	2	8	1	2	<=4
64	Enterococcus	faecium	26	2006	Animal feed	Poultry feed	<=128	256	<=512	1	0.25	2	4	1	64	2	4	4	1	1	<=4
65	Enterococcus	faecium	26	2006	Animal feed	Poultry feed	<=128	<=128	1024	2	0.06	1	>8	>32	64	2	2	8	4	2	16
66	Enterococcus	faecium	26	2006	Animal feed	Poultry feed	<=128	<=128	<=512	<=0.5	0.25	1	>8	>32	64	2	4	8	1	2	>32
67	Enterococcus	faecium	26	2006	Animal feed	Poultry feed	<=128	256	<=512	<=0.5	0.12	2	>8	>32	64	2	4	8	1	2	>32
68	Enterococcus	faecium	27	2006	Animal feed	Ingredient	<=128	<=128	<=512	<=0.5	0.12	1	4	4	64	2	4	8	1	2	<=4
69	Enterococcus	hirae	27	2006	Animal feed	Ingredient	<=128	<=128	<=512	<=0.5	0.12	1	<=0.5	2	64	2	2	4	0.5	2	<=4
70	Enterococcus	faecium	27	2006	Animal feed	Ingredient	<=128	256	<=512	<=0.5	0.06	2	4	8	64	2	4	8	1	2	<=4
71	Enterococcus	faecium	27	2006	Animal feed	Ingredient	<=128	<=128	<=512	<=0.5	0.06	2	4	4	64	2	4	8	1	2	<=4
72	Enterococcus	faecium	28	2006	Animal feed	Feed for minor species	<=128	256	<=512	<=0.5	0.25	2	4	4	64	2	4	8	1	2	>32
73	Enterococcus	faecium	28	2006	Animal feed	Feed for minor species	<=128	<=128	<=512	<=0.5	0.12	2	4	4	64	2	4	4	1	2	>32
74	Enterococcus	faecium	28	2006	Animal feed	Feed for minor species	<=128	256	<=512	<=0.5	0.06	2	4	1	64	2	4	8	2	1	>32
75	Enterococcus	faecium	28	2006	Animal feed	Feed for minor species	<=128	1024	<=512	<=0.5	0.12	1	<=0.5	4	64	2	1	4	2	1	>32
76	Enterococcus	faecium	29	2006	Animal feed	Poultry feed	<=128	<=128	<=512	1	0.12	2	<=0.5	8	64	2	8	8	1	2	>32
77	Enterococcus	faecium	29	2006	Animal feed	Poultry feed	<=128	<=128	<=512	<=0.5	0.12	<=0.5	4	2	64	2	4	4	1	2	>32
78	Enterococcus	faecium	29	2006	Animal feed	Poultry feed	<=128	512	<=512	<=0.5	0.12	1	4	4	64	2	4	8	2	2	>32
79	Enterococcus	faecium	29	2006	Animal feed	Poultry feed	<=128	512	<=512	<=0.5	0.12	1	2	2	64	2	1	8	1	1	>32
80	Enterococcus	faecium	31	2006	Animal feed	Cattle feed	<=128	256	<=512	2	0.12	2	2	8	64	2	2	8	2	2	<=4
81	Enterococcus	faecium	31	2006	Animal feed	Cattle feed	<=128	256	<=512	<=0.5	0.06	2	1	1	>64	2	4	8	4	1	<=4
82	Enterococcus	faecium	33	2006	Animal feed	Ingredient	<=128	256	<=512	<=0.5	0.06	2	<=0.5	8	64	2	4	8	1	2	<=4
83	Enterococcus	faecium	33	2006	Animal feed	Ingredient	<=128	256	<=512	<=0.5	0.06	2	2	4	64	2	4	8	1	2	<=4
84	Enterococcus	casseliflavus	34	2006	Animal feed	Animal feed (for unspecified animal species)	<=128	<=128	<=512	4	0.12	2	<=0.5	4	32	2	1	8	1	1	<=4
85	Enterococcus	casseliflavus	34	2006	Animal feed	Animal feed (for unspecified animal species)	<=128	<=128	<=512	4	0.06	1	<=0.5	4	32	2	1	8	1	1	<=4
86	Enterococcus	casseliflavus	34	2006	Animal feed	Animal feed (for unspecified animal species)	<=128	<=128	<=512	4	0.12	1	<=0.5	4	32	2	2	8	1	2	<=4
87	Enterococcus	casseliflavus	34	2006	Animal feed	Animal feed (for unspecified animal species)	<=128	<=128	<=512	4	0.12	8	1	4	16	2	2	8	1	2	<=4
88	Enterococcus	faecium	35	2006	Animal feed	Poultry feed	<=128	<=128	<=512	<=0.5	0.06	2	<=0.5	8	64	2	4	4	0.5	2	16
89	Enterococcus	faecium	35	2006	Animal feed	Poultry feed	<=128	256	<=512	<=0.5	0.06	2	1	<=0.25	64	2	2	8	2	2	16
90	Enterococcus	faecium	36	2006	Animal feed	Cattle feed	<=128	512	<=512	<=0.5	0.12	2	2	8	64	2	2	8	1	2	>32
91	Enterococcus	faecium	36	2006	Animal feed	Cattle feed	<=128	256	<=512	<=0.5	0.12	1	2	8	64	2	4	4	1	2	>32
92	Enterococcus	faecium	37	2006	Animal feed	Animal feed (for unspecified animal species)	<=128	512	<=512	<=0.5	0.12	2	2	8	64	2	4	4	2	2	>32
93	Enterococcus	faecium	37	2006	Animal feed	Animal feed (for unspecified animal species)	<=128	512	<=512	<=0.5	0.12	1	>8	>32	>64	2	2	8	1	2	>32
94	Enterococcus	faecium	38	2006	Animal feed	Poultry feed	<=128	<=128	<=512	<=0.5	0.12	2	2	4	>64	2	4	4	2	2	32
95	Enterococcus	faecium	38	2006	Animal feed	Poultry feed	<=128	256	<=512	1	0.12	1	<=0.5	4	>64	2	2	4	>4	2	32
96	Enterococcus	faecium	39	2006	Animal feed	Poultry feed	<=128	<=128	<=512	<=0.5	0.12	2	2	1	64	2	2	8	4	1	>32
97	Enterococcus	faecium	39	2006	Animal feed	Poultry feed	<=128	<=128	<=512	<=0.5	0.06	2	4	4	64	2	2	4	1	2	<=4
98	Enterococcus	faecium	40	2006	Animal feed	Poultry feed	<=128	<=128	<=512	<=0.5	0.06	2	4	4	64	2	4	8	1	2	<=4
99	Enterococcus	faecium	40	2006	Animal feed	Poultry feed	<=128	512	<=512	2	0.12	<=0.5	>8	4	64	2	<=0.5	4	2	4	<=4
100	Enterococcus	faecalis	40	2006	Animal feed	Poultry feed	<=128	<=128	<=512	1	0.12	1	<=0.5	4	16	2	4	8	2	8	<=4
101	Enterococcus	faecium	41	2006	Animal feed	Poultry feed	<=128	256	<=512	<=0.5	0.12	2	1	4	32	2	4	4	1	2	<=4
102	Enterococcus	faecium	41	2006	Animal feed	Poultry feed	<=128	512	<=512	<=0.5	0.06	2	2	4	64	2	4	8	1	2	<=4
103	Enterococcus	faecium	41	2006	Animal feed	Poultry feed	<=128	<=128	<=512	<=0.5	0.06	2	2	2	64	2	4	8	1	2	<=4
104	Enterococcus	faecium	41	2006	Animal feed	Poultry feed	<=128	256	<=512	<=0.5	0.06	2	4	4	>64	2	4	8	1	2	<=4
105	Enterococcus	faecium	42	2006	Animal feed	Poultry feed	<=128	512	<=512	<=0.5	0.12	2	2	4	64	2	1	8	2	2	<=4
106	Enterococcus	faecium	42	2006	Animal feed	Poultry feed	<=128	512	<=512	<=0.5	0.06	2	8	8	64	2	4	8	1	2	<=4
107	Enterococcus	faecium	42	2006	Animal feed	Poultry feed	<=128	256	<=512	1	0.06	2	<=0.5	4	64	2	2	8	1	2	<=4
108	Enterococcus	faecium	42	2006	Animal feed	Poultry feed	<=128	512	<=512	1	0.12	1	<=0.5	4	64	2	2	8	1	2	<=4
109	Enterococcus	faecium	43	2006	Animal feed	Poultry feed	<=128	512	<=512	1	0.12	2	2	4	>64	2	8	8	1	2	<=4
110	Enterococcus	faecium	43	2006	Animal feed	Poultry feed	<=128	256	<=512	<=0.5	0.06	1	4	2	>64	2	2	8	1	2	<=4
111	Enterococcus	faecium	43	2006	Animal feed	Poultry feed	<=128	<=128	<=512	<=0.5	0.12	2	2	1	64	2	4	4	4	1	<=4
112	Enterococcus	faecium	44	2006	Animal feed	Ingredient	<=128	512	<=512	<=0.5	0.06	2	4	4	>64	2	8	4	2	2	<=4
113	Enterococcus	faecium	44	2006	Animal feed	Ingredient	<=128	256	<=512	1	0.06	2	<=0.5	8	64	2	2	8	0.25	2	<=4
114	Enterococcus	faecium	44	2006	Animal feed	Ingredient	<=128	256	<=512	1	0.06	2	2	4	>64	2	2	8	1	2	<=4
115	Enterococcus	faecium	44	2006	Animal feed	Ingredient	<=128	512	<=512	<=0.5	0.12	2	4	8	64	2	4	8	1	2	<=4
116	Enterococcus	faecium	45	2006	Animal feed	Ingredient	<=128	256	<=512	<=0.5	0.12	2	4	4	64	2	8	8	1	2	>32
117	Enterococcus	faecium	45	2006	Animal feed	Ingredient	<=128	256	<=512	<=0.5	0.12	1	2	4	64	2	4	8	2	2	<=4
118	Enterococcus	faecium	45	2006	Animal feed	Ingredient	<=128	<=128	<=512	<=0.5	0.06	2	1	1	>64	2	4	8	4	1	<=4
119	Enterococcus	faecium	46	2006	Animal feed	Cattle feed	<=128	256	<=512	<=0.5	0.06	2	2	4	64	2	4	8	4	2	<=4
120	Enterococcus	faecium	46	2006	Animal feed	Cattle feed	<=128	<=128	<=512	<=0.5	0.12	1	4	4	>64	2	2	8	0.5	2	<=4
121	Enterococcus	faecium	46	2006	Animal feed	Cattle feed	<=128	256	<=512	<=0.5	0.12	1	4	2	64	2	4	4	1	2	<=4
122	Enterococcus	faecium	46	2006	Animal feed	Cattle feed	<=128	512	<=512	<=0.5	0.12	4	4	8	64	2	4	8	2	2	<=4
123	Enterococcus	faecium	47	2006	Animal feed	Cattle feed	<=128	256	<=512	1	0.06	2	<=0.5	8	>64	2	4	8	2	2	<=4
124	Enterococcus	faecium	47	2006	Animal feed	Cattle feed	<=128	256	<=512	1	0.06	2	<=0.5	8	>64	2	4	8	2	2	<=4
125	Enterococcus	faecium	47	2006	Animal feed	Cattle feed	<=128	<=128	<=512	<=0.5	0.12	2	>8	>32	>64	2	4	8	1	8	<=4
126	Enterococcus	durans	47	2006	Animal feed	Cattle feed	<=128	<=128	<=512	<=0.5	0.06	1	<=0.5	2	>64	2	<=0.5	4	1	1	<=4
127	Enterococcus	faecium	48	2006	Animal feed	Feed for minor species	<=128	512	<=512	1	0.12	4	2	8	>64	2	4	8	2	2	<=4
128	Enterococcus	faecium	48	2006	Animal feed	Feed for minor species	<=128	256	<=512	<=0.5	0.12	2	2	8	64	2	4	8	2	2	>32
129	Enterococcus	faecium	48	2006	Animal feed	Feed for minor species	<=128	512	<=512	<=0.5	0.12	1	4	4	>64	2	4	8	1	2	32
130	Enterococcus	faecium	49	2006	Animal feed	Cattle feed	<=128	512	<=512	<=0.5	0.12	2	2	4	>64	2	4	8	1	2	<=4
131	Enterococcus	faecium	49	2006	Animal feed	Cattle feed	<=128	256	<=512	1	0.06	2	<=0.5	2	64	2	4	8	2	1	>32
132	Enterococcus	faecium	49	2006	Animal feed	Cattle feed	<=128	<=128	<=512	<=0.5	0.06	1	>8	>32	64	2	4	8	1	1	>32
133	Enterococcus	faecium	49	2006	Animal feed	Cattle feed	<=128	256	<=512	<=0.5	0.12	2	>8	>32	64	2	4	8	1	4	>32
134	Enterococcus	faecium	50	2006	Animal feed	Swine feed	<=128	256	<=512	1	0.12	2	4	1	>64	2	4	8	>4	1	<=4
135	Enterococcus	faecium	50	2006	Animal feed	Swine feed	<=128	1024	<=512	<=0.5	0.12	1	<=0.5	4	>64	2	4	8	2	1	<=4
136	Enterococcus	faecium	50	2006	Animal feed	Swine feed	<=128	512	<=512	<=0.5	0.12	1	<=0.5	8	>64	2	4	8	1	2	<=4
138	Enterococcus	faecium	50	2006	Animal feed	Swine feed	<=128	<=128	<=512	1	0.06	4	2	1	64	2	2	8	2	2	<=4
139	Enterococcus	faecium	51	2006	Animal feed	Cattle feed	<=128	<=128	<=512	<=0.5	0.06	2	2	4	>64	2	<=0.5	8	1	2	<=4
140	Enterococcus	faecium	51	2006	Animal feed	Cattle feed	<=128	<=128	<=512	<=0.5	0.06	1	2	4	>64	2	<=0.5	4	1	2	<=4
141	Enterococcus	faecium	51	2006	Animal feed	Cattle feed	<=128	512	<=512	1	0.06	2	2	4	>64	2	4	8	1	2	<=4
142	Enterococcus	faecium	52	2006	Pet food	Pet food/treat	<=128	256	<=512	1	0.25	4	2	8	64	2	4	8	2	2	<=4
143	Enterococcus	faecium	52	2006	Pet food	Pet food/treat	<=128	256	<=512	<=0.5	0.12	2	1	1	64	2	4	8	4	1	32
144	Enterococcus	faecium	52	2006	Pet food	Pet food/treat	<=128	256	<=512	<=0.5	0.06	2	2	8	64	2	4	8	2	2	<=4
145	Enterococcus	faecium	53	2006	Animal feed	Poultry feed	<=128	>1024	1024	<=0.5	0.12	2	<=0.5	4	64	2	4	8	2	2	>32
146	Enterococcus	faecium	53	2006	Animal feed	Poultry feed	<=128	512	<=512	1	0.12	8	4	8	64	2	8	8	4	2	<=4
147	Enterococcus	faecium	53	2006	Animal feed	Poultry feed	<=128	256	<=512	<=0.5	0.12	1	2	4	>64	2	8	8	1	2	<=4
148	Enterococcus	faecium	53	2006	Animal feed	Poultry feed	<=128	256	<=512	<=0.5	0.06	1	2	4	>64	2	4	8	1	2	<=4
149	Enterococcus	faecalis	54	2006	Animal feed	Ingredient	<=128	<=128	<=512	1	0.12	1	1	2	8	2	4	8	2	8	<=4
150	Enterococcus	faecium	54	2006	Animal feed	Ingredient	<=128	<=128	<=512	<=0.5	0.06	<=0.5	<=0.5	1	32	2	<=0.5	8	1	1	<=4
151	Enterococcus	faecium	54	2006	Animal feed	Ingredient	<=128	<=128	<=512	1	0.12	2	4	8	64	2	2	8	1	4	<=4
152	Enterococcus	faecium	55	2006	Animal feed	Ingredient	<=128	<=128	<=512	<=0.5	0.06	2	2	8	64	2	4	8	2	2	<=4
153	Enterococcus	faecium	55	2006	Animal feed	Ingredient	<=128	<=128	<=512	<=0.5	0.06	2	2	8	64	2	4	8	1	2	<=4
154	Enterococcus	faecium	56	2006	Animal feed	Ingredient	<=128	256	<=512	<=0.5	0.06	2	2	2	64	2	8	8	1	1	<=4
155	Enterococcus	faecium	56	2006	Animal feed	Ingredient	<=128	512	<=512	2	0.03	4	2	8	64	2	4	8	2	2	<=4
156	Enterococcus	faecium	56	2006	Animal feed	Ingredient	<=128	<=128	<=512	<=0.5	0.12	2	8	8	64	2	4	8	1	2	<=4
157	Enterococcus	faecium	58	2006	Animal feed	Poultry feed	<=128	<=128	<=512	<=0.5	0.06	2	<=0.5	2	64	2	4	16	2	1	<=4
158	Enterococcus	faecium	58	2006	Animal feed	Poultry feed	<=128	256	<=512	<=0.5	0.06	2	<=0.5	2	64	2	4	8	2	1	<=4
159	Enterococcus	faecium	58	2006	Animal feed	Poultry feed	<=128	256	<=512	<=0.5	0.06	2	4	2	64	2	4	8	1	1	<=4
160	Enterococcus	faecium	59	2006	Animal feed	Medicated feed	<=128	<=128	<=512	2	0.06	2	2	8	64	2	4	8	2	2	<=4
161	Enterococcus	faecium	59	2006	Animal feed	Medicated feed	<=128	256	<=512	<=0.5	0.06	2	4	8	64	2	2	8	0.5	2	>32
162	Enterococcus	faecium	59	2006	Animal feed	Medicated feed	<=128	256	<=512	<=0.5	0.06	2	2	8	64	2	2	4	1	2	>32
163	Enterococcus	faecium	59	2006	Animal feed	Medicated feed	<=128	256	<=512	4	0.06	2	4	8	64	2	2	8	2	2	<=4
164	Enterococcus	faecium	60	2006	Animal feed	Medicated feed	<=128	256	<=512	<=0.5	0.06	2	4	8	64	2	2	8	1	2	<=4
165	Enterococcus	durans	60	2006	Animal feed	Medicated feed	<=128	<=128	<=512	<=0.5	0.12	1	<=0.5	2	64	2	<=0.5	4	0.5	1	>32
166	Enterococcus	faecium	60	2006	Animal feed	Medicated feed	<=128	512	<=512	<=0.5	0.06	2	4	8	64	2	4	8	2	2	32
167	Enterococcus	faecium	60	2006	Animal feed	Medicated feed	<=128	512	<=512	<=0.5	0.06	2	4	8	64	2	4	8	2	2	32
168	Enterococcus	faecium	61	2006	Animal feed	Poultry feed	<=128	256	<=512	2	0.06	2	2	8	64	2	2	8	2	2	<=4
169	Enterococcus	faecium	61	2006	Animal feed	Poultry feed	<=128	<=128	<=512	2	0.12	1	<=0.5	8	64	2	2	8	2	2	<=4
170	Enterococcus	faecium	61	2006	Animal feed	Poultry feed	<=128	<=128	<=512	<=0.5	0.03	1	4	4	64	2	4	8	1	2	<=4
171	Enterococcus	faecium	62	2006	Animal feed	Ingredient	<=128	256	<=512	<=0.5	0.12	1	4	8	64	2	2	8	2	2	<=4
172	Enterococcus	faecium	62	2006	Animal feed	Ingredient	<=128	512	<=512	<=0.5	0.12	2	4	8	64	2	4	4	2	2	<=4
173	Enterococcus	faecium	64	2006	Animal feed	Cattle feed	<=128	256	<=512	<=0.5	0.12	2	4	8	64	2	4	8	2	4	<=4
174	Enterococcus	faecium	64	2006	Animal feed	Cattle feed	<=128	512	<=512	<=0.5	0.12	2	<=0.5	8	>64	2	4	8	2	2	<=4
175	Enterococcus	faecium	65	2006	Pet food	Pet food/treat	<=128	512	<=512	<=0.5	0.25	2	<=0.5	8	64	2	4	8	2	2	<=4
176	Enterococcus	faecium	65	2006	Pet food	Pet food/treat	<=128	512	<=512	1	0.25	2	<=0.5	8	64	2	4	8	2	4	<=4
177	Enterococcus	faecium	68	2006	Animal feed	Animal feed (for unspecified animal species)	<=128	512	<=512	<=0.5	0.25	2	2	4	64	2	<=0.5	8	1	2	<=4
178	Enterococcus	faecium	71	2006	Pet food	Pet food/treat	<=128	<=128	<=512	<=0.5	0.12	2	2	4	64	1	16	4	>4	4	>32
179	Enterococcus	faecium	71	2006	Pet food	Pet food/treat	<=128	<=128	<=512	<=0.5	0.12	2	2	4	64	1	16	4	>4	4	>32
180	Enterococcus	faecium	71	2006	Pet food	Pet food/treat	<=128	<=128	<=512	<=0.5	0.03	2	1	1	64	1	4	4	2	1	<=4
181	Enterococcus	faecium	72	2006	Pet food	Pet food/treat	<=128	<=128	<=512	2	0.06	2	<=0.5	4	>64	2	2	8	1	2	<=4
182	Enterococcus	faecium	74	2006	Animal feed	Feed for minor species	<=128	256	<=512	<=0.5	0.12	2	2	4	64	2	4	8	2	2	<=4
183	Enterococcus	faecium	74	2006	Animal feed	Feed for minor species	<=128	512	<=512	<=0.5	0.06	2	8	1	64	2	<=0.5	8	1	1	<=4
184	Enterococcus	faecium	76	2006	Animal feed	Animal feed (for unspecified animal species)	<=128	<=128	<=512	<=0.5	0.06	4	2	8	64	2	2	8	>4	2	<=4
185	Enterococcus	faecium	76	2006	Animal feed	Animal feed (for unspecified animal species)	<=128	<=128	<=512	<=0.5	0.12	2	2	4	64	2	4	8	>4	2	>32
186	Enterococcus	faecium	77	2006	Pet food	Pet food/treat	<=128	<=128	<=512	4	0.25	2	4	8	64	2	4	8	1	2	<=4
187	Enterococcus	faecium	79	2006	Animal feed	Cattle feed	<=128	<=128	<=512	<=0.5	0.12	2	4	8	64	2	4	8	0.5	2	<=4
188	Enterococcus	faecium	79	2006	Animal feed	Cattle feed	<=128	<=128	<=512	<=0.5	0.12	2	4	8	64	2	4	8	0.5	2	<=4
189	Enterococcus	faecium	79	2006	Animal feed	Cattle feed	<=128	256	<=512	<=0.5	0.12	2	<=0.5	8	64	2	4	8	2	2	32
190	Enterococcus	faecium	82	2006	Animal feed	Ingredient	<=128	256	<=512	<=0.5	0.06	2	<=0.5	8	64	2	2	8	1	2	32
191	Enterococcus	faecium	82	2006	Animal feed	Ingredient	<=128	256	<=512	<=0.5	0.12	2	<=0.5	8	>64	2	2	8	1	2	32
192	Enterococcus	faecalis	85	2007	Pet food	Pet food/treat	<=128	<=128	<=512	2	0.12	1	<=0.5	1	8	1	4	4	1	4	<=4
193	Enterococcus	faecium	85	2007	Pet food	Pet food/treat	<=128	<=128	<=512	<=0.5	0.12	2	1	1	64	2	4	4	2	1	<=4
194	Enterococcus	faecium	85	2007	Pet food	Pet food/treat	<=128	<=128	<=512	<=0.5	0.25	1	1	2	64	2	2	4	4	1	>32
195	Enterococcus	faecium	87	2007	Pet food	Pet food/treat	<=128	256	<=512	<=0.5	0.12	2	<=0.5	8	64	2	4	4	2	2	<=4
196	Enterococcus	hirae	87	2007	Pet food	Pet food/treat	<=128	<=128	<=512	<=0.5	0.12	4	<=0.5	2	32	2	2	4	1	2	<=4
197	Enterococcus	faecium	89	2007	Pet food	Pet food/treat	<=128	<=128	<=512	<=0.5	0.03	2	2	4	32	2	4	4	0.5	2	<=4
198	Enterococcus	faecium	90	2007	Pet food	Pet food/treat	<=128	256	<=512	<=0.5	0.12	2	<=0.5	4	64	2	4	4	1	2	<=4
199	Enterococcus	faecium	90	2007	Pet food	Pet food/treat	<=128	256	<=512	<=0.5	0.12	2	<=0.5	8	64	2	4	4	1	2	<=4
200	Enterococcus	faecium	90	2007	Pet food	Pet food/treat	<=128	256	<=512	<=0.5	0.12	2	<=0.5	8	64	2	4	4	1	2	<=4
201	Enterococcus	mundtii	93	2007	Pet food	Pet food/treat	<=128	<=128	<=512	1	0.06	1	1	8	32	2	4	8	2	2	<=4
202	Enterococcus	mundtii	93	2007	Pet food	Pet food/treat	<=128	<=128	<=512	<=0.5	0.06	1	<=0.5	4	16	1	4	4	1	2	<=4
203	Enterococcus	faecium	94	2007	Animal feed	Cattle feed	<=128	<=128	<=512	1	0.06	2	>8	>32	64	1	4	8	1	2	>32
204	Enterococcus	faecium	94	2007	Animal feed	Cattle feed	<=128	<=128	<=512	1	0.06	2	>8	>32	64	1	4	8	1	2	>32
205	Enterococcus	faecium	94	2007	Animal feed	Cattle feed	<=128	<=128	<=512	1	0.06	2	>8	>32	64	1	4	8	1	2	>32
206	Enterococcus	faecium	94	2007	Animal feed	Cattle feed	<=128	<=128	<=512	1	0.06	2	>8	>32	64	1	4	8	1	2	>32
207	Enterococcus	faecium	95	2007	Animal feed	Poultry feed	<=128	<=128	<=512	1	0.06	2	>8	>32	64	1	4	8	1	2	>32
208	Enterococcus	faecium	95	2007	Animal feed	Poultry feed	<=128	<=128	<=512	1	0.06	2	>8	>32	64	1	4	8	1	2	>32
209	Enterococcus	faecium	95	2007	Animal feed	Poultry feed	<=128	<=128	<=512	1	0.06	2	>8	>32	64	1	4	8	1	2	>32
210	Enterococcus	faecium	95	2007	Animal feed	Poultry feed	<=128	<=128	<=512	1	0.06	2	>8	>32	64	1	4	8	1	2	>32
211	Enterococcus	faecium	96	2007	Pet food	Pet food/treat	<=128	<=128	<=512	1	0.06	2	>8	>32	64	1	4	8	1	2	>32
212	Enterococcus	faecium	96	2007	Pet food	Pet food/treat	<=128	<=128	<=512	1	0.06	2	>8	>32	64	1	4	8	1	2	>32
213	Enterococcus	faecium	96	2007	Pet food	Pet food/treat	<=128	<=128	<=512	1	0.06	2	>8	>32	64	1	4	8	1	2	>32
214	Enterococcus	faecium	96	2007	Pet food	Pet food/treat	<=128	<=128	<=512	1	0.06	2	>8	>32	64	1	4	8	1	2	>32
215	Enterococcus	faecium	97	2007	Pet food	Pet food/treat	<=128	<=128	<=512	1	0.06	2	>8	>32	64	1	4	8	1	2	>32
216	Enterococcus	faecium	97	2007	Pet food	Pet food/treat	<=128	<=128	<=512	1	0.06	2	>8	>32	64	1	4	8	1	2	>32
217	Enterococcus	faecium	97	2007	Pet food	Pet food/treat	<=128	<=128	<=512	1	0.06	2	>8	>32	64	1	4	8	1	2	>32
218	Enterococcus	faecium	97	2007	Pet food	Pet food/treat	<=128	<=128	<=512	1	0.06	2	>8	>32	64	1	4	8	1	2	>32
219	Enterococcus	faecium	99	2007	Pet food	Pet food/treat	<=128	<=128	<=512	<=0.5	0.06	4	2	4	64	2	4	4	2	2	<=4
220	Enterococcus	faecium	99	2007	Pet food	Pet food/treat	<=128	<=128	<=512	<=0.5	0.03	2	4	4	64	2	4	8	1	2	<=4
221	Enterococcus	faecium	99	2007	Pet food	Pet food/treat	<=128	<=128	<=512	<=0.5	0.03	2	<=0.5	8	64	1	4	4	1	2	<=4
222	Enterococcus	faecium	99	2007	Pet food	Pet food/treat	<=128	<=128	<=512	<=0.5	0.06	2	1	8	64	2	4	8	0.5	2	<=4
223	Enterococcus	faecium	100	2007	Animal feed	Poultry feed	<=128	<=128	<=512	<=0.5	0.06	4	4	4	64	2	4	4	1	2	<=4
224	Enterococcus	faecium	100	2007	Animal feed	Poultry feed	<=128	256	<=512	<=0.5	0.06	2	<=0.5	8	64	2	4	8	2	2	<=4
225	Enterococcus	faecium	100	2007	Animal feed	Poultry feed	<=128	<=128	<=512	<=0.5	0.06	4	8	>32	64	2	4	8	2	2	32
226	Enterococcus	faecium	100	2007	Animal feed	Poultry feed	<=128	<=128	<=512	<=0.5	0.06	4	2	8	64	2	4	8	1	2	<=4
227	Enterococcus	faecium	101	2007	Pet food	Pet food/treat	<=128	<=128	<=512	<=0.5	0.03	2	4	4	64	2	4	4	0.5	2	<=4
228	Enterococcus	faecium	101	2007	Pet food	Pet food/treat	<=128	<=128	<=512	1	0.03	2	2	4	64	2	4	4	1	2	<=4
229	Enterococcus	faecium	101	2007	Pet food	Pet food/treat	<=128	<=128	<=512	<=0.5	0.06	4	2	4	64	2	4	4	1	2	<=4
230	Enterococcus	faecium	101	2007	Pet food	Pet food/treat	<=128	<=128	<=512	2	0.06	4	2	2	64	2	1	4	2	1	<=4
231	Enterococcus	hirae	102	2007	Pet food	Pet food/treat	<=128	256	<=512	<=0.5	0.03	1	<=0.5	4	>64	2	2	4	2	1	<=4
232	Enterococcus	faecium	102	2007	Pet food	Pet food/treat	<=128	256	<=512	<=0.5	0.03	1	<=0.5	4	64	2	2	4	1	1	<=4
233	Enterococcus	faecium	102	2007	Pet food	Pet food/treat	<=128	<=128	<=512	<=0.5	0.03	2	2	4	64	1	4	4	1	2	<=4
234	Enterococcus	faecium	102	2007	Pet food	Pet food/treat	<=128	<=128	<=512	<=0.5	0.12	<=0.5	<=0.5	2	64	2	4	8	2	1	>32
235	Enterococcus	faecium	103	2007	Animal feed	Cattle feed	<=128	<=128	<=512	1	0.06	4	2	4	64	2	2	8	1	2	<=4
236	Enterococcus	faecium	103	2007	Animal feed	Cattle feed	<=128	<=128	<=512	<=0.5	0.06	2	4	4	64	2	4	4	0.5	2	<=4
237	Enterococcus	faecium	103	2007	Animal feed	Cattle feed	<=128	<=128	<=512	1	0.03	4	2	8	>64	2	2	8	1	2	<=4
238	Enterococcus	faecium	103	2007	Animal feed	Cattle feed	<=128	<=128	<=512	<=0.5	0.06	4	2	4	64	2	2	4	1	2	<=4
239	Enterococcus	faecium	106	2007	Pet food	Pet food/treat	<=128	<=128	<=512	<=0.5	0.06	2	4	2	64	2	4	8	1	1	32
240	Enterococcus	faecium	106	2007	Pet food	Pet food/treat	<=128	256	<=512	1	0.03	4	1	8	64	2	4	4	2	2	<=4
241	Enterococcus	faecium	106	2007	Pet food	Pet food/treat	<=128	<=128	<=512	<=0.5	0.06	2	<=0.5	4	64	2	1	4	1	2	>32
242	Enterococcus	faecium	106	2007	Pet food	Pet food/treat	<=128	<=128	<=512	<=0.5	0.03	2	1	8	>64	2	4	8	2	2	<=4
243	Enterococcus	faecium	109	2007	Pet food	Pet food/treat	<=128	<=128	<=512	<=0.5	0.12	1	4	2	64	2	4	4	1	1	<=4
244	Enterococcus	faecium	109	2007	Pet food	Pet food/treat	<=128	<=128	<=512	<=0.5	0.06	1	4	2	64	1	4	4	1	1	<=4
245	Enterococcus	faecium	109	2007	Pet food	Pet food/treat	<=128	<=128	<=512	<=0.5	0.06	2	4	4	64	2	2	4	1	1	<=4
246	Enterococcus	faecium	109	2007	Pet food	Pet food/treat	<=128	<=128	<=512	2	0.06	2	2	8	64	2	4	4	2	2	16
247	Enterococcus	faecium	110	2007	Pet food	Pet food/treat	<=128	<=128	<=512	<=0.5	0.06	1	4	8	64	2	4	4	0.5	2	<=4
248	Enterococcus	faecium	110	2007	Pet food	Pet food/treat	<=128	<=128	<=512	<=0.5	0.06	2	4	4	64	2	4	4	0.5	2	<=4
249	Enterococcus	faecium	111	2007	Pet food	Pet food/treat	<=128	256	<=512	<=0.5	0.06	2	4	4	64	2	2	4	0.5	2	<=4
250	Enterococcus	faecium	111	2007	Pet food	Pet food/treat	<=128	256	<=512	<=0.5	0.06	2	4	8	64	2	2	4	0.5	2	<=4
251	Enterococcus	faecium	111	2007	Pet food	Pet food/treat	<=128	256	<=512	1	0.06	4	<=0.5	8	64	2	4	4	1	2	<=4
252	Enterococcus	faecium	111	2007	Pet food	Pet food/treat	<=128	256	<=512	<=0.5	0.06	2	<=0.5	2	64	2	4	4	1	1	>32
253	Enterococcus	faecium	112	2007	Animal feed	Feed for minor species	<=128	256	<=512	<=0.5	0.06	2	8	2	>64	2	4	8	2	1	>32
254	Enterococcus	faecium	112	2007	Animal feed	Feed for minor species	<=128	256	<=512	<=0.5	0.06	2	4	1	64	1	4	4	1	1	>32
255	Enterococcus	faecium	112	2007	Animal feed	Feed for minor species	<=128	<=128	<=512	<=0.5	0.06	2	4	4	64	1	4	4	1	2	<=4
256	Enterococcus	faecium	113	2007	Pet food	Pet food/treat	<=128	256	<=512	<=0.5	0.06	2	<=0.5	8	64	2	4	4	1	2	<=4
257	Enterococcus	faecium	113	2007	Pet food	Pet food/treat	<=128	256	<=512	<=0.5	0.12	2	<=0.5	8	64	2	8	8	1	2	<=4
258	Enterococcus	faecium	113	2007	Pet food	Pet food/treat	<=128	256	<=512	1	0.12	2	<=0.5	8	64	2	4	4	1	2	<=4
259	Enterococcus	faecium	114	2007	Pet food	Pet food/treat	<=128	512	<=512	<=0.5	0.12	4	2	8	64	2	4	4	2	2	<=4
260	Enterococcus	faecium	114	2007	Pet food	Pet food/treat	<=128	<=128	<=512	<=0.5	0.06	2	<=0.5	8	64	2	4	4	1	2	<=4
261	Enterococcus	faecium	114	2007	Pet food	Pet food/treat	<=128	256	<=512	<=0.5	0.12	2	1	8	64	2	2	4	1	2	<=4
262	Enterococcus	faecium	115	2007	Pet food	Pet food/treat	<=128	<=128	<=512	<=0.5	0.03	2	<=0.5	8	64	2	4	4	1	2	<=4
263	Enterococcus	faecium	115	2007	Pet food	Pet food/treat	<=128	<=128	<=512	2	0.06	2	<=0.5	8	64	1	4	4	1	2	<=4
264	Enterococcus	faecium	115	2007	Pet food	Pet food/treat	<=128	<=128	<=512	2	0.06	4	2	4	64	2	4	8	>4	2	<=4
265	Enterococcus	faecium	115	2007	Pet food	Pet food/treat	<=128	<=128	<=512	<=0.5	0.06	4	2	4	32	2	2	4	>4	1	<=4
266	Enterococcus	faecium	116	2007	Pet food	Pet food/treat	<=128	256	<=512	1	0.03	2	4	4	64	2	8	8	1	1	<=4
267	Enterococcus	faecium	116	2007	Pet food	Pet food/treat	<=128	256	<=512	<=0.5	0.06	2	4	2	64	2	8	4	1	1	<=4
268	Enterococcus	faecium	116	2007	Pet food	Pet food/treat	<=128	256	<=512	<=0.5	0.06	2	2	2	64	1	4	4	1	1	<=4
269	Enterococcus	faecium	116	2007	Pet food	Pet food/treat	<=128	256	<=512	<=0.5	0.06	2	2	4	32	1	4	4	1	2	<=4
270	Enterococcus	faecium	118	2007	Pet food	Pet food/treat	<=128	<=128	<=512	<=0.5	0.06	2	8	8	64	2	4	4	0.5	2	<=4
271	Enterococcus	faecium	118	2007	Pet food	Pet food/treat	<=128	256	<=512	<=0.5	0.06	1	<=0.5	4	64	2	8	4	1	2	<=4
272	Enterococcus	faecium	118	2007	Pet food	Pet food/treat	<=128	<=128	<=512	1	0.03	4	2	8	64	2	2	8	2	2	>32
273	Enterococcus	faecium	118	2007	Pet food	Pet food/treat	<=128	<=128	<=512	1	0.12	2	4	8	64	2	4	8	1	2	<=4
274	Enterococcus	faecium	119	2007	Pet food	Pet food/treat	<=128	512	<=512	1	0.12	4	4	16	32	2	8	4	2	2	<=4
275	Enterococcus	faecium	119	2007	Pet food	Pet food/treat	<=128	512	<=512	1	0.12	4	4	8	64	2	8	8	4	2	<=4
276	Enterococcus	faecium	119	2007	Pet food	Pet food/treat	<=128	512	<=512			4	2		32	2	8	4	2
277	Enterococcus	faecium	124	2007	Pet food	Pet food/treat	<=128	256	<=512	<=0.5	0.25	2	<=0.5	8	64	2	4	4	2	2	<=4
278	Enterococcus	faecium	124	2007	Pet food	Pet food/treat	<=128	<=128	<=512	<=0.5	0.12	1	<=0.5	4	16	2	8	4	2	2	<=4
279	Enterococcus	faecium	124	2007	Pet food	Pet food/treat	<=128	<=128	<=512	1	0.12	1	<=0.5	8	32	2	8	8	2	2	<=4
280	Enterococcus	faecium	125	2007	Pet food	Pet food/treat	<=128	<=128	<=512	<=0.5	0.12	2	2	8	64	2	<=0.5	4	1	2	<=4
281	Enterococcus	faecium	125	2007	Pet food	Pet food/treat	<=128	<=128	<=512	<=0.5	0.12	1	2	8	64	2	<=0.5	4	1	2	<=4
282	Enterococcus	faecium	125	2007	Pet food	Pet food/treat	<=128	<=128	<=512	<=0.5	0.12	2	4	2	64	2	2	4	0.5	2	<=4
283	Enterococcus	faecium	125	2007	Pet food	Pet food/treat	<=128	<=128	<=512	<=0.5	0.12	2	2	8	64	2	<=0.5	4	1	2	<=4
284	Enterococcus	faecium	126	2007	Pet food	Pet food/treat	<=128	<=128	<=512	<=0.5	0.12	2	2	4	64	2	4	4	0.5	2	>32
285	Enterococcus	faecium	126	2007	Pet food	Pet food/treat	<=128	<=128	<=512	<=0.5	0.12	1	<=0.5	8	64	1	4	4	1	2	>32
286	Enterococcus	faecium	126	2007	Pet food	Pet food/treat	<=128	<=128	<=512	<=0.5	0.12	2	4	4	64	2	4	4	0.5	2	>32
287	Enterococcus	faecium	126	2007	Pet food	Pet food/treat	<=128	<=128	<=512	<=0.5	0.12	2	2	4	64	1	4	4	0.5	2	>32
288	Enterococcus	faecium	127	2007	Pet food	Pet food/treat	<=128	256	<=512	1	0.12	4	2	8	64	2	4	4	2	2	<=4
289	Enterococcus	faecium	127	2007	Pet food	Pet food/treat	<=128	<=128	<=512	<=0.5	0.12	2	2	4	64	2	4	4	0.5	2	16
290	Enterococcus	faecium	127	2007	Pet food	Pet food/treat	<=128	256	<=512	<=0.5	0.12	2	2	8	64	2	16	8	2	2	<=4
291	Enterococcus	faecium	128	2007	Animal feed	Poultry feed	<=128	<=128	<=512	<=0.5	0.12	2	4	2	64	2	8	8	0.5	2	<=4
292	Enterococcus	faecium	128	2007	Animal feed	Poultry feed	<=128	<=128	<=512	<=0.5	0.12	4	2	4	64	2	8	8	2	2	<=4
293	Enterococcus	faecium	128	2007	Animal feed	Poultry feed	<=128	<=128	<=512	<=0.5	0.03	2	4	8	64	2	4	8	0.5	2	<=4
294	Enterococcus	durans	128	2007	Animal feed	Poultry feed	<=128	<=128	<=512	<=0.5	0.06	2	4	8	64	2	8	8	0.5	2	<=4
295	Enterococcus	faecium	129	2007	Animal feed	Poultry feed	<=128	512	<=512	1	0.12	4	4	8	32	2	8	8	2	8	<=4
296	Enterococcus	faecium	129	2007	Animal feed	Poultry feed	<=128	<=128	<=512	<=0.5	0.06	2	2	4	32	2	2	4	0.25	2	8
297	Enterococcus	faecium	129	2007	Animal feed	Poultry feed	<=128	<=128	<=512	<=0.5	0.06	2	2	1	64	2	4	4	1	1	>32
298	Enterococcus	faecium	129	2007	Animal feed	Poultry feed	<=128	<=128	<=512	<=0.5	0.12	2	2	1	64	1	4	4	1	1	>32
299	Enterococcus	faecium	131	2007	Animal feed	Animal feed (for unspecified animal species)	<=128	<=128	<=512	<=0.5	0.12	2	2	4	64	2	8	4	1	2	>32
300	Enterococcus	faecium	131	2007	Animal feed	Animal feed (for unspecified animal species)	<=128	<=128	<=512	<=0.5	0.12	2	2	4	64	2	16	8	1	2	>32
301	Enterococcus	gallinarum	131	2007	Animal feed	Animal feed (for unspecified animal species)	<=128	512	<=512	<=0.5	0.06	2	2	2	64	2	4	4	0.25	1	<=4
302	Enterococcus	gallinarum	131	2007	Animal feed	Animal feed (for unspecified animal species)	<=128	512	<=512	<=0.5	0.06	2	4	2	64	2	4	8	0.5	1	<=4
303	Enterococcus	casseliflavus	132	2007	Animal feed	Cattle feed	<=128	<=128	<=512	4	0.06	<=0.5	1	1	8	<=0.5	<=0.5	<=2	1	1	<=4
304	Enterococcus	casseliflavus	132	2007	Animal feed	Cattle feed	<=128	<=128	<=512	4	0.12	<=0.5	1	1	8	<=0.5	<=0.5	<=2	1	2	<=4
305	Enterococcus	casseliflavus	132	2007	Animal feed	Cattle feed	<=128	<=128	<=512	4	0.12	<=0.5	1	1	8	<=0.5	<=0.5	<=2	2	1	<=4
306	Enterococcus	casseliflavus	132	2007	Animal feed	Cattle feed	<=128	<=128	<=512	4	0.12	<=0.5	1	1	8	<=0.5	<=0.5	<=2	2	1	<=4
307	Enterococcus	faecium	133	2007	Animal feed	Feed for minor species	<=128	<=128	<=512	2	0.12	2	2	2	64	2	4	4	1	1	<=4
308	Enterococcus	faecium	133	2007	Animal feed	Feed for minor species	<=128	<=128	<=512	2	0.06	2	2	4	64	4	4	8	1	1	<=4
309	Enterococcus	faecium	133	2007	Animal feed	Feed for minor species	<=128	256	<=512	<=0.5	0.12	2	4	4	64	2	8	8	0.5	2	<=4
310	Enterococcus	faecium	133	2007	Animal feed	Feed for minor species	<=128	<=128	<=512	<=0.5	0.12	1	2	4	64	2	4	4	2	2	<=4
311	Enterococcus	faecium	135	2007	Animal feed	Animal feed (for unspecified animal species)	<=128	<=128	<=512	2	0.12	2	1	4	32	2	8	8	4	1	>32
312	Enterococcus	faecium	135	2007	Animal feed	Animal feed (for unspecified animal species)	<=128	256	<=512	<=0.5	0.06	2	4	4	64	2	4	4	0.5	1	8
313	Enterococcus	faecium	135	2007	Animal feed	Animal feed (for unspecified animal species)	<=128	<=128	<=512	<=0.5	0.06	2	1	4	64	2	2	4	1	2	<=4
314	Enterococcus	faecium	135	2007	Animal feed	Animal feed (for unspecified animal species)	<=128	<=128	<=512	<=0.5	0.06	4	<=0.5	4	64	2	2	4	1	2	<=4
315	Enterococcus	faecium	137	2007	Animal feed	Ingredient	<=128	256	<=512	1	0.06	2	2	4	64	1	1	4	1	2	<=4
316	Enterococcus	faecium	137	2007	Animal feed	Ingredient	<=128	<=128	<=512	<=0.5	0.06	2	4	4	64	2	1	4	0.5	2	<=4
317	Enterococcus	faecium	137	2007	Animal feed	Ingredient	<=128	<=128	<=512	<=0.5	0.06	1	4	4	64	2	4	4	0.5	2	<=4
318	Enterococcus	faecium	137	2007	Animal feed	Ingredient	<=128	<=128	<=512	<=0.5	0.03	2	4	4	64	2	2	4	1	2	<=4
319	Enterococcus	faecium	139	2007	Pet food	Pet food/treat	<=128	<=128	<=512	2	0.06	4	1	4	64	2	4	8	2	2	<=4
320	Enterococcus	faecium	139	2007	Pet food	Pet food/treat	<=128	<=128	<=512	2	0.03	4	1	8	64	2	4	8	2	2	<=4
321	Enterococcus	faecium	139	2007	Pet food	Pet food/treat	<=128	<=128	<=512	2	0.06	4	2	4	64	2	4	4	4	2	<=4
322	Enterococcus	faecium	139	2007	Pet food	Pet food/treat	<=128	<=128	<=512	2	0.06	4	2	8	>64	2	8	8	>4	2	<=4
323	Enterococcus	faecium	142	2007	Pet food	Pet food/treat	<=128	256	<=512	1	0.12	4	2	8	64	2	4	4	1	2	>32
324	Enterococcus	faecium	142	2007	Pet food	Pet food/treat	<=128	<=128	<=512	<=0.5	0.06	2	4	2	32	2	4	4	1	2	32
325	Enterococcus	faecium	142	2007	Pet food	Pet food/treat	<=128	<=128	<=512	<=0.5	0.12	2	4	4	32	2	8	8	1	2	32
326	Enterococcus	faecium	142	2007	Pet food	Pet food/treat	<=128	<=128	<=512	<=0.5	0.12	2	4	4	32	2	4	8	1	2	>32
327	Enterococcus	faecium	144	2007	Pet food	Pet food/treat	<=128	<=128	<=512	<=0.5	0.06	2	2	8	32	2	4	4	0.5	2	<=4
328	Enterococcus	faecium	144	2007	Pet food	Pet food/treat	<=128	<=128	<=512	<=0.5	0.12	2	2	4	64	2	2	4	1	2	>32
329	Enterococcus	faecium	144	2007	Pet food	Pet food/treat	<=128	<=128	<=512	<=0.5	0.12	2	4	4	64	2	4	8	1	2	>32
330	Enterococcus	faecium	144	2007	Pet food	Pet food/treat	<=128	<=128	<=512	<=0.5	0.12	2	2	4	64	1	4	4	2	2	>32
331	Enterococcus	faecium	149	2007	Animal feed	Cattle feed	<=128	256	<=512	1	0.06	1	1	8	>64	2	4	8	2	2	16
332	Enterococcus	faecium	149	2007	Animal feed	Cattle feed	<=128	256	<=512	<=0.5	0.12	2	2	8	64	2	2	4	0.5	2	<=4
333	Enterococcus	faecium	150	2007	Pet food	Pet food/treat	<=128	<=128	<=512	1	0.03	2	1	2	64	2	8	8	4	1	<=4
334	Enterococcus	faecium	151	2007	Animal feed	Feed for minor species	<=128	<=128	<=512	<=0.5	0.06	2	2	4	64	2	2	4	0.5	2	>32
335	Enterococcus	faecium	151	2007	Animal feed	Feed for minor species	<=128	256	<=512	<=0.5	0.06	1	2	4	>64	2	4	32	2	2	>32
336	Enterococcus	faecium	151	2007	Animal feed	Feed for minor species	<=128	<=128	<=512	<=0.5	0.06	2	<=0.5	8	64	2	4	4	1	2	>32
337	Enterococcus	faecium	151	2007	Animal feed	Feed for minor species	<=128	<=128	<=512	<=0.5	0.12	2	4	8	64	2	4	8	1	2	>32
338	Enterococcus	faecium	152	2007	Animal feed	Animal feed (for unspecified animal species)	<=128	<=128	<=512	2	0.12	4	1	8	64	2	4	8	4	2	>32
339	Enterococcus	faecium	152	2007	Animal feed	Animal feed (for unspecified animal species)	<=128	<=128	<=512	<=0.5	0.12	2	>8	>32	64	1	4	8	1	2	>32
340	Enterococcus	durans	156	2007	Pet food	Pet food/treat	<=128	<=128	<=512	<=0.5	0.12	<=0.5	<=0.5	2	16	1	<=0.5	4	0.5	1	>32
341	Enterococcus	faecium	156	2007	Pet food	Pet food/treat	<=128	<=128	<=512	<=0.5	0.12	2	1	2	64	2	<=0.5	8	4	1	16
342	Enterococcus	faecium	156	2007	Pet food	Pet food/treat	<=128	256	<=512	<=0.5	0.06	2	<=0.5	4	64	4	4	8	2	1	<=4
343	Enterococcus	faecium	156	2007	Pet food	Pet food/treat	<=128	<=128	<=512	<=0.5	0.03	2	2	4	64	1	4	4	1	2	<=4
344	Enterococcus	faecium	157	2007	Pet food	Pet food/treat	<=128	512	<=512	<=0.5	0.06	4	2	4	64	2	4	8	1	2	<=4
345	Enterococcus	faecium	157	2007	Pet food	Pet food/treat	<=128	256	<=512	<=0.5	0.06	4	4	4	64	2	4	4	1	2	<=4
346	Enterococcus	faecium	157	2007	Pet food	Pet food/treat	<=128	256	<=512	1	0.03	2	2	4	64	2	4	4	1	1	<=4
347	Enterococcus	faecium	157	2007	Pet food	Pet food/treat	<=128	512	<=512	1	0.03	4	4	8	>64	2	8	8	1	2	<=4
348	Enterococcus	faecium	158	2007	Pet food	Pet food/treat	<=128	<=128	<=512	<=0.5	0.06	2	4	2	64	2	4	4	0.5	1	<=4
349	Enterococcus	faecium	158	2007	Pet food	Pet food/treat	<=128	256	<=512	<=0.5	0.03	2	4	2	64	2	4	4	0.5	1	<=4
350	Enterococcus	faecium	158	2007	Pet food	Pet food/treat	<=128	<=128	<=512	1	0.06	2	8	4	>64	2	8	8	1	1	<=4
351	Enterococcus	faecium	158	2007	Pet food	Pet food/treat	<=128	<=128	<=512	<=0.5	0.06	2	4	2	64	2	2	4	0.5	1	<=4
352	Enterococcus	faecium	161	2007	Pet food	Pet food/treat	<=128	<=128	<=512	2	0.06	2	2	8	64	2	4	4	1	2	<=4
353	Enterococcus	faecium	161	2007	Pet food	Pet food/treat	<=128	<=128	<=512	<=0.5	0.03	2	4	8	64	2	4	4	0.5	2	<=4
354	Enterococcus	hirae	161	2007	Pet food	Pet food/treat	<=128	<=128	<=512	1	0.06	8	<=0.5	2	32	2	1	4	0.5	2	32
355	Enterococcus	hirae	161	2007	Pet food	Pet food/treat	<=128	<=128	<=512	1	0.06	8	<=0.5	2	32	2	1	4	0.5	2	32
356	Enterococcus	faecium	162	2007	Animal feed	Animal feed (for unspecified animal species)	<=128	<=128	<=512	<=0.5	0.06	2	2	8	64	2	4	4	1	2	<=4
357	Enterococcus	faecium	162	2007	Animal feed	Animal feed (for unspecified animal species)	<=128	<=128	<=512	<=0.5	0.06	2	2	8	64	2	4	4	1	2	<=4
358	Enterococcus	faecium	167	2007	Pet food	Pet food/treat	<=128	<=128	<=512	2	0.06	4	1	8	64	2	8	8	2	2	<=4
359	Enterococcus	faecium	167	2007	Pet food	Pet food/treat	<=128	<=128	<=512	2	0.06	4	1	8	64	2	4	4	2	2	<=4
360	Enterococcus	faecium	169	2007	Animal feed	Poultry feed	<=128	<=128	<=512	2	0.06	4	1	8	64	2	8	8	2	2	<=4
362	Enterococcus	faecium	169	2007	Animal feed	Poultry feed	<=128	<=128	<=512	2	0.06	4	1	8	64	2	8	8	2	2	<=4
364	Enterococcus	faecium	169	2007	Animal feed	Poultry feed	<=128	<=128	<=512	2	0.06	4	1	8	64	2	8	8	2	2	<=4
366	Enterococcus	faecium	169	2007	Animal feed	Poultry feed	<=128	<=128	<=512	2	0.06	4	1	8	64	2	8	8	2	2	<=4
368	Enterococcus	faecium	170	2007	Pet food	Pet food/treat	<=128	<=128	<=512	2	0.06	4	1	8	64	2	8	8	2	2	<=4
369	Enterococcus	faecium	170	2007	Pet food	Pet food/treat	<=128	<=128	<=512	2	0.06	4	1	8	64	2	4	4	2	2	<=4
370	Enterococcus	faecium	170	2007	Pet food	Pet food/treat	<=128	<=128	<=512	2	0.06	4	1	8	64	2	8	8	2	2	<=4
371	Enterococcus	faecium	170	2007	Pet food	Pet food/treat	<=128	<=128	<=512	2	0.06	4	1	8	64	2	4	4	2	2	<=4
372	Enterococcus	faecium	180	2007	Pet food	Supplement for pets	<=128	<=128	<=512	<=0.5	0.03	2	4	4	32	2	2	4	0.5	1	<=4
373	Enterococcus	faecium	180	2007	Pet food	Supplement for pets	<=128	<=128	<=512	<=0.5	0.03	2	2	4	64	2	4	8	0.5	2	<=4
374	Enterococcus	faecium	180	2007	Pet food	Supplement for pets	<=128	<=128	<=512	<=0.5	0.06	2	8	8	64	2	4	4	0.5	2	<=4
375	Enterococcus	faecium	180	2007	Pet food	Supplement for pets	<=128	<=128	<=512	<=0.5	0.06	2	4	4	32	2	4	4	0.5	2	<=4
376	Enterococcus	faecium	195	2008	Animal feed	Poultry feed	<=128	<=128	<=512	<=0.5	0.12	2	>8	>32	32	<=0.5	2	4	0.5	4	>32
377	Enterococcus	faecium	195	2008	Animal feed	Poultry feed	<=128	512	<=512	<=0.5	0.12	2	2	4	64	1	2	4	1	2	<=4
378	Enterococcus	faecium	197	2008	Pet food	Pet food/treat	<=128	<=128	<=512	<=0.5	0.12	4	2	4	64	2	2	4	2	2	<=4
379	Enterococcus	faecium	197	2008	Pet food	Pet food/treat	<=128	256	<=512	<=0.5	0.06	2	2	4	64	2	4	8	1	1	<=4
380	Enterococcus	faecium	199	2008	Pet food	Supplement for pets	<=128	<=128	<=512	<=0.5	0.25	4	2	2	64	2	4	4	2	1	>32
381	Enterococcus	faecium	199	2008	Pet food	Supplement for pets	<=128	<=128	<=512	<=0.5	0.12	4	2	2	64	1	4	4	1	1	>32
382	Enterococcus	faecium	201	2008	Animal feed	Poultry feed	<=128	<=128	<=512	<=0.5	0.12	2	2	2	32	1	4	<=2	0.5	2	<=4
383	Enterococcus	faecium	201	2008	Animal feed	Poultry feed	<=128	<=128	<=512	<=0.5	0.12	2	1	2	64	2	4	4	2	2	<=4
384	Enterococcus	faecium	201	2008	Animal feed	Poultry feed	<=128	<=128	<=512	<=0.5	0.03	1	2	8	32	1	1	4	0.5	2	<=4
385	Enterococcus	faecium	201	2008	Animal feed	Poultry feed	<=128	<=128	<=512	<=0.5	0.06	2	<=0.5	16	64	2	8	8	2	2	<=4
386	Enterococcus	faecium	202	2008	Pet food	Pet food/treat	<=128	<=128	<=512	<=0.5	0.12	1	2	2	32	1	2	4	0.5	2	<=4
387	Enterococcus	faecium	202	2008	Pet food	Pet food/treat	<=128	<=128	<=512	<=0.5	0.12	1	2	4	32	1	2	4	0.5	2	<=4
388	Enterococcus	faecium	204	2008	Pet food	Pet food/treat	<=128	<=128	<=512	2	0.03	<=0.5	<=0.5	1	64	2	2	4	2	1	<=4
389	Enterococcus	faecium	204	2008	Pet food	Pet food/treat	<=128	<=128	<=512	2	0.12	<=0.5	1	2	64	2	2	8	4	1	>32
390	Enterococcus	faecium	204	2008	Pet food	Pet food/treat	<=128	<=128	<=512	2	0.03	<=0.5	<=0.5	1	64	1	1	4	2	1	<=4
391	Enterococcus	faecium	204	2008	Pet food	Pet food/treat	<=128	<=128	<=512	<=0.5	0.03	<=0.5	1	4	64	2	1	4	2	2	<=4
392	Enterococcus	faecium	208	2008	Animal feed	Ingredient	<=128	<=128	<=512	<=0.5	0.03	2	4	8	64	2	4	4	0.5	2	<=4
393	Enterococcus	faecium	208	2008	Animal feed	Ingredient	<=128	<=128	<=512	<=0.5	0.12	1	<=0.5	8	64	2	4	4	1	2	<=4
394	Enterococcus	faecium	208	2008	Animal feed	Ingredient	<=128	<=128	<=512	<=0.5	0.12	2	2	8	64	2	<=0.5	4	1	2	<=4
395	Enterococcus	faecium	208	2008	Animal feed	Ingredient	<=128	<=128	<=512	<=0.5	0.12	2	1	1	64	1	4	4	4	1	<=4
396	Enterococcus	faecium	209	2008	Pet food	Pet food/treat	<=128	256	<=512	<=0.5	0.12	2	<=0.5	4	64	2	4	4	1	2	<=4
397	Enterococcus	faecium	209	2008	Pet food	Pet food/treat	<=128	256	<=512	<=0.5	0.12	2	<=0.5	4	32	1	4	4	1	2	<=4
398	Enterococcus	faecium	209	2008	Pet food	Pet food/treat	<=128	<=128	<=512	<=0.5	0.12	4	4	4	64	2	8	4	2	2	>32
399	Enterococcus	faecium	209	2008	Pet food	Pet food/treat	<=128	<=128	<=512	<=0.5	0.12	2	4	4	64	2	4	4	2	2	<=4
400	Enterococcus	faecium	210	2008	Animal feed	Swine feed	<=128	<=128	<=512	<=0.5	0.12	2	2	8	64	1	<=0.5	4	1	2	<=4
401	Enterococcus	faecium	210	2008	Animal feed	Swine feed	<=128	<=128	<=512	<=0.5	0.03	2	2	4	64	2	4	4	1	2	<=4
402	Enterococcus	faecium	210	2008	Animal feed	Swine feed	<=128	<=128	<=512	<=0.5	0.06	1	1	4	32	2	2	4	1	2	<=4
403	Enterococcus	faecium	210	2008	Animal feed	Swine feed	<=128	<=128	<=512	<=0.5	0.03	2	1	8	64	2	4	8	1	2	<=4
404	Enterococcus	faecium	214	2008	Animal feed	Animal feed (for unspecified animal species)	<=128	512	<=512	<=0.5	0.12	4	4	8	64	2	4	4	2	2	<=4
405	Enterococcus	faecium	214	2008	Animal feed	Animal feed (for unspecified animal species)	<=128	256	<=512	<=0.5	0.12	2	2	4	64	2	4	4	1	2	<=4
406	Enterococcus	faecium	214	2008	Animal feed	Animal feed (for unspecified animal species)	<=128	512	<=512	<=0.5	0.12	4	4	8	64	2	4	4	2	2	<=4
407	Enterococcus	faecium	214	2008	Animal feed	Animal feed (for unspecified animal species)	<=128	<=128	<=512	<=0.5	0.03	2	2	1	64	1	4	4	1	1	<=4
408	Enterococcus	faecium	217	2008	Pet food	Pet food/treat	<=128	<=128	<=512	<=0.5	0.12	2	2	4	32	1	2	4	1	2	>32
409	Enterococcus	faecium	225	2008	Pet food	Pet food/treat	<=128	<=128	<=512	<=0.5	0.06	1	2	2	64	1	2	4	2	1	<=4
410	Enterococcus	faecium	225	2008	Pet food	Pet food/treat	<=128	<=128	<=512	<=0.5	0.06	1	2	4	64	1	2	4	2	1	<=4
411	Enterococcus	faecium	225	2008	Pet food	Pet food/treat	<=128	<=128	<=512	<=0.5	0.03	<=0.5	<=0.5	2	64	2	2	4	4	1	<=4
413	Enterococcus	faecium	225	2008	Pet food	Pet food/treat	<=128	<=128	<=512	<=0.5	0.06	1	<=0.5	2	64	1	4	4	4	1	>32
414	Enterococcus	faecium	233	2008	Pet food	Pet food/treat	<=128	<=128	<=512	<=0.5	0.12	2	2	4	32	1	4	4	0.5	2	<=4
415	Enterococcus	faecium	233	2008	Pet food	Pet food/treat	<=128	<=128	<=512	2	0.06	2	2	8	>64	2	4	8	2	2	16
416	Enterococcus	faecium	233	2008	Pet food	Pet food/treat	<=128	<=128	<=512	<=0.5	0.12	2	2	4	32	2	4	4	0.5	2	<=4
417	Enterococcus	faecium	233	2008	Pet food	Pet food/treat	<=128	<=128	<=512	<=0.5	0.12	2	4	4	64	2	4	4	1	2	>32
418	Enterococcus	faecium	234	2008	Pet food	Pet food/treat	<=128	256	<=512	<=0.5	0.06	2	2	2	64	2	4	8	1	1	16
419	Enterococcus	faecium	234	2008	Pet food	Pet food/treat	<=128	256	<=512	1	0.12	2	4	2	64	2	8	8	1	1	16
420	Enterococcus	faecium	234	2008	Pet food	Pet food/treat	<=128	256	<=512	<=0.5	0.12	2	2	8	64	2	8	8	1	2	<=4
421	Enterococcus	faecium	234	2008	Pet food	Pet food/treat	<=128	<=128	<=512	<=0.5	0.03	1	2	8	64	2	4	8	0.5	2	<=4
422	Enterococcus	faecium	237	2008	Pet food	Pet food/treat	<=128	<=128	<=512	<=0.5	0.06	2	4	8	64	2	4	4	1	2	<=4
423	Enterococcus	faecium	237	2008	Pet food	Pet food/treat	<=128	<=128	<=512	2	0.12	4	2	8	64	2	4	8	>4	2	<=4
424	Enterococcus	faecium	237	2008	Pet food	Pet food/treat	<=128	<=128	<=512	<=0.5	0.06	2	1	1	64	2	4	8	2	1	<=4
425	Enterococcus	faecium	240	2008	Pet food	Pet food/treat	<=128	<=128	<=512	<=0.5	0.06	4	4	2	64	2	4	4	0.5	1	>32
426	Enterococcus	faecium	240	2008	Pet food	Pet food/treat	<=128	<=128	<=512	1	0.12	2	4	4	64	2	8	8	2	1	<=4
427	Enterococcus	faecium	247	2008	Animal feed	Animal feed (for unspecified animal species)	<=128	256	<=512	1	0.06	2	2	8	64	1	4	4	2	2	<=4
428	Enterococcus	faecium	247	2008	Animal feed	Animal feed (for unspecified animal species)	<=128	>1024	<=512	1	0.06	>16	1	4	64	1	>16	4	2	2	<=4
429	Enterococcus	faecium	250	2008	Animal feed	Poultry feed	<=128	<=128	<=512	<=0.5	0.12	2	1	2	64	2	4	4	4	1	>32
430	Enterococcus	faecium	250	2008	Animal feed	Poultry feed	<=128	<=128	<=512	<=0.5	0.06	4	1	2	64	2	4	8	4	1	>32
431	Enterococcus	faecium	250	2008	Animal feed	Poultry feed	<=128	<=128	<=512	<=0.5	0.06	2	1	2	64	2	4	4	4	1	>32
432	Enterococcus	faecium	251	2008	Animal feed	Animal feed (for unspecified animal species)	<=128	<=128	<=512	2	0.03	2	2	4	64	2	4	4	>4	2	<=4
433	Enterococcus	faecium	251	2008	Animal feed	Animal feed (for unspecified animal species)	<=128	512	<=512	<=0.5	0.12	4	4	8	64	2	4	4	1	1	>32
434	Enterococcus	faecium	252	2008	Animal feed	Animal feed (for unspecified animal species)	<=128	<=128	<=512	1	0.06	4	2	8	64	2	4	16	2	2	>32
435	Enterococcus	faecium	252	2008	Animal feed	Animal feed (for unspecified animal species)	<=128	<=128	<=512	0.5	0.12	4	2	4	>64	1	4	16	2	2	>32
436	Enterococcus	faecium	252	2008	Animal feed	Animal feed (for unspecified animal species)	<=128	256	<=512	1	0.12	4	4	8	64	2	4	8	2	2	<=4
437	Enterococcus	faecium	252	2008	Animal feed	Animal feed (for unspecified animal species)	<=128	256	<=512	1	0.12	4	2	8	64	4	4	8	2	2	<=4
438	Enterococcus	faecium	254	2008	Pet food	Pet food/treat	<=128	<=128	<=512	<=0.5	0.06	2	>8	>32	64	2	8	8	4	2	>32
439	Enterococcus	faecium	254	2008	Pet food	Pet food/treat	<=128	<=128	<=512	<=0.5	0.12	4	2	8	>64	2	8	8	4	2	>32
440	Enterococcus	faecium	255	2008	Pet food	Pet food/treat	<=128	<=128	<=512	1	0.12	4	2	1	>64	2	8	8	4	<=0.5	>32
441	Enterococcus	faecium	259	2008	Pet food	Pet food/treat	<=128	512	<=512	0.5	0.12	4	<=0.25	8	64	2	8	4	2	4	<=1
442	Enterococcus	faecium	263	2008	Animal feed	Ingredient	<=128	<=128	<=512	0.5	0.06	4	2	4	64	2	4	4	1	2	<=1
443	Enterococcus	faecium	263	2008	Animal feed	Ingredient	<=128	<=128	<=512	0.5	0.12	4	2	4	64	2	4	4	1	2	<=1
444	Enterococcus	faecium	263	2008	Animal feed	Ingredient	<=128	<=128	<=512	0.5	0.06	8	2	4	64	2	4	4	1	2	<=1
445	Enterococcus	faecium	263	2008	Animal feed	Ingredient	<=128	<=128	<=512	0.5	0.06	4	2	4	64	2	4	4	1	2	<=1
446	Enterococcus	faecium	264	2008	Pet food	Pet food/treat	<=128	<=128	<=512	0.5	0.06	2	2	4	64	1	4	4	1	2	>32
447	Enterococcus	faecium	264	2008	Pet food	Pet food/treat	<=128	<=128	<=512	0.5	0.06	2	4	4	64	1	4	4	1	2	>32
448	Enterococcus	faecium	264	2008	Pet food	Pet food/treat	<=128	<=128	<=512	0.5	0.06	2	8	4	64	2	4	4	1	2	32
449	Enterococcus	faecium	264	2008	Pet food	Pet food/treat	<=128	256	<=512	0.5	0.06	2	4	4	64	2	4	4	1	2	32
450	Enterococcus	faecium	265	2008	Pet food	Pet food/treat	<=128	<=128	<=512	0.5	0.12	2	4	4	64	1	4	4	1	2	>32
451	Enterococcus	faecium	265	2008	Pet food	Pet food/treat	<=128	<=128	<=512	0.5	0.12	4	4	4	64	2	4	4	1	2	>32
452	Enterococcus	faecium	272	2008	Pet food	Pet food/treat	<=128	<=128	<=512	0.5	0.06	4	2	1	64	2	4	4	4	<=0.5	<=1
453	Enterococcus	faecium	272	2008	Pet food	Pet food/treat	<=128	<=128	<=512	0.5	0.06	4	2	1	64	2	4	4	4	<=0.5	<=1
454	Enterococcus	faecium	272	2008	Pet food	Pet food/treat	<=128	<=128	<=512	0.5	0.06	1	2	2	64	1	2	4	2	<=0.5	<=1
455	Enterococcus	faecium	273	2008	Pet food	Pet food/treat	<=128	<=128	<=512	1	0.06	<=0.25	2	8	64	2	4	4	1	2	<=1
456	Enterococcus	faecium	273	2008	Pet food	Pet food/treat	<=128	<=128	<=512	0.5	0.06	2	4	4	64	2	4	4	1	2	<=1
457	Enterococcus	faecium	274	2008	Animal feed	Animal feed (for unspecified animal species)	<=128	<=128	<=512	2	0.06	2	2	4	64	1	2	4	>4	2	>32
458	Enterococcus	faecium	274	2008	Animal feed	Animal feed (for unspecified animal species)	<=128	<=128	<=512	0.5	0.12	2	4	4	64	1	4	4	0.5	2	>32
459	Enterococcus	faecium	278	2008	Animal feed	Animal feed (for unspecified animal species)	<=128	256	<=512	0.5	0.06	1	<=0.25	2	32	1	0.5	<=2	1	1	32
460	Enterococcus	faecium	278	2008	Animal feed	Animal feed (for unspecified animal species)	<=128	<=128	<=512	1	0.06	2	4	1	64	2	4	4	2	1	<=1
461	Enterococcus	faecium	278	2008	Animal feed	Animal feed (for unspecified animal species)	<=128	<=128	<=512	1	0.06	2	4	4	64	2	8	4	2	4	<=1
462	Enterococcus	faecium	279	2008	Animal feed	Animal feed (for unspecified animal species)	<=128	<=128	<=512	0.5	0.06	4	4	4	64	2	4	4	1	2	<=1
463	Enterococcus	faecium	279	2008	Animal feed	Animal feed (for unspecified animal species)	<=128	<=128	<=512	0.5	0.06	4	4	8	64	2	2	4	2	4	<=1
464	Enterococcus	faecium	284	2008	Animal feed	Animal feed (for unspecified animal species)	<=128	<=128	<=512	1	0.06	2	2	8	64	2	4	4	1	2	<=1
465	Enterococcus	faecium	284	2008	Animal feed	Animal feed (for unspecified animal species)	<=128	<=128	<=512	0.5	0.06	4	<=0.25	8	>64	2	2	4	1	4	<=1
466	Enterococcus	faecium	284	2008	Animal feed	Animal feed (for unspecified animal species)	<=128	<=128	<=512	0.5	0.06	4	<=0.25	8	>64	2	2	4	1	2	<=1
467	Enterococcus	faecium	285	2008	Pet food	Pet food/treat	<=128	512	<=512	1	0.06	2	4	4	>64	2	4	4	1	2	<=1
468	Enterococcus	faecium	285	2008	Pet food	Pet food/treat	<=128	256	<=512	1	0.06	4	2	4	>64	2	4	4	1	2	<=1
469	Enterococcus	faecium	285	2008	Pet food	Pet food/treat	<=128	256	<=512	0.5	0.06	2	<=0.25	8	64	2	4	4	2	4	<=1
470	Enterococcus	faecium	285	2008	Pet food	Pet food/treat	<=128	<=128	<=512	0.5	0.06	2	<=0.25	4	64	1	4	4	2	2	<=1
471	Enterococcus	faecium	292	2008	Pet food	Pet food/treat	<=128	<=128	<=512	0.5	0.06	2	2	1	64	1	2	4	4	<=0.5	<=1
472	Enterococcus	faecium	292	2008	Pet food	Pet food/treat	<=128	<=128	<=512	0.5	0.06	2	1	1	64	1	2	4	2	<=0.5	<=1
473	Enterococcus	faecium	292	2008	Pet food	Pet food/treat	<=128	<=128	<=512	0.5	0.06	1	2	8	64	2	4	4	2	4	<=1
474	Enterococcus	faecium	292	2008	Pet food	Pet food/treat	<=128	<=128	<=512	0.5	0.06	1	2	8	32	1	4	4	2	2	<=1
475	Enterococcus	faecium	297	2008	Pet food	Pet food/treat	<=128	<=128	<=512	1	0.12	2	4	8	64	2	4	8	2	2	<=4
476	Enterococcus	faecium	297	2008	Pet food	Pet food/treat	<=128	<=128	<=512	<=0.5	0.12	2	4	4	64	2	4	8	2	2	<=4
477	Enterococcus	faecium	297	2008	Pet food	Pet food/treat	<=128	<=128	<=512	1	0.12	2	4	8	64	2	4	8	2	2	<=4
478	Enterococcus	faecium	298	2008	Animal feed	Feed for minor species	<=128	<=128	<=512	1	0.12	1	2	8	64	4	4	8	2	2	<=4
479	Enterococcus	faecium	298	2008	Animal feed	Feed for minor species	<=128	<=128	<=512	1	0.25	2	<=0.5	4	>64	2	4	8	4	2	>32
480	Enterococcus	faecium	299	2008	Pet food	Pet food/treat	<=128	<=128	<=512	<=0.5	0.12	4	2	4	>64	2	<=0.5	8	0.5	2	<=4
481	Enterococcus	faecium	299	2008	Pet food	Pet food/treat	<=128	<=128	<=512	<=0.5	0.25	4	2	8	>64	2	<=0.5	8	1	2	<=4
482	Enterococcus	faecium	302	2008	Animal feed	Poultry feed	<=128	<=128	<=512	1	0.06	2	<=0.5	1	64	2	4	4	4	1	>32
483	Enterococcus	faecium	302	2008	Animal feed	Poultry feed	<=128	256	<=512	<=0.5	0.12	2	4	4	>64	2	4	8	2	2	>32
484	Enterococcus	faecium	303	2008	Pet food	Pet food/treat	<=128	256	<=512	<=0.5	0.12	1	2	2	>64	2	4	4	0.5	2	>32
485	Enterococcus	faecium	303	2008	Pet food	Pet food/treat	<=128	<=128	<=512	2	0.12	4	<=0.5	1	32	1	2	16	2	1	>32
486	Enterococcus	faecium	303	2008	Pet food	Pet food/treat	<=128	256	<=512	<=0.5	0.12	4	4	4	>64	2	2	4	1	2	<=4
487	Enterococcus	faecium	303	2008	Pet food	Pet food/treat	<=128	<=128	<=512	1	0.03	2	1	2	64	2	2	8	4	1	<=4
488	Enterococcus	faecium	304	2008	Pet food	Pet food/treat	<=128	512	<=512	1	0.06	4	2	8	32	2	8	8	4	2	<=4
489	Enterococcus	faecium	304	2008	Pet food	Pet food/treat	<=128	1024	<=512	2	0.06	4	4	16	64	2	16	8	4	2	<=4
490	Enterococcus	faecium	304	2008	Pet food	Pet food/treat	<=128	512	<=512	1	0.12	4	4	8	64	2	8	8	4	2	<=4
491	Enterococcus	faecium	304	2008	Pet food	Pet food/treat	<=128	512	<=512	1	0.12	4	2	8	32	2	8	4	4	2	<=4
492	Enterococcus	faecium	313	2008	Animal feed	Horse feed	<=128	<=128	<=512	0.5	0.12	4	>8	>32	64	1	2	4	2	2	>32
493	Enterococcus	faecium	313	2008	Animal feed	Horse feed	<=128	<=128	<=512	0.5	0.06	4	>8	>32	64	1	2	4	2	2	>32
494	Enterococcus	faecium	313	2008	Animal feed	Horse feed	<=128	<=128	<=512	0.5	0.25	2	2	2	64	1	4	4	4	2	<=1
495	Enterococcus	faecium	313	2008	Animal feed	Horse feed	<=128	<=128	<=512	0.5	0.06	2	2	2	64	1	4	4	4	2	<=1
496	Enterococcus	faecium	314	2008	Animal feed	Cattle feed	<=128	<=128	<=512	2	0.06	4	1	4	64	1	4	4	2	2	<=1
497	Enterococcus	faecium	314	2008	Animal feed	Cattle feed	<=128	<=128	<=512	4	0.06	4	2	8	64	2	4	8	2	2	<=1
498	Enterococcus	faecium	314	2008	Animal feed	Cattle feed	<=128	<=128	<=512	<=0.5	0.12	4	4	4	>64	2	4	8	4	<=1	<=4
507	Enterococcus	faecium	318	2008	Animal feed	Animal feed (for unspecified animal species)	<=128	<=128	<=512	0.5	0.06	4	4	4	64	1	4	4	0.5	2	32
508	Enterococcus	faecium	318	2008	Animal feed	Animal feed (for unspecified animal species)	<=128	<=128	<=512	0.5	0.06	4	2	4	64	1	4	4	0.5	2	16
509	Enterococcus		319	2008	Animal feed	Cattle feed	<=128	<=128	<=512	0.5	0.06	4	4	4	64	2	4	4	1	2	<=1
510	Enterococcus	faecium	319	2008	Animal feed	Cattle feed	<=128	<=128	<=512	0.5	0.06	4	2	8	64	2	4	4	2	2	<=1
511	Enterococcus	faecium	319	2008	Animal feed	Cattle feed	<=128	<=128	<=512	0.5	0.06	4	2	4	64	1	2	4	2	2	<=1
512	Enterococcus	faecium	319	2008	Animal feed	Cattle feed	<=128	<=128	<=512	<=0.5	0.06	4	2	8	>64	2	8	8	2	2	<=4
513	Enterococcus	faecium	323	2008	Animal feed	Animal feed (for unspecified animal species)	<=128	256	<=512	1	0.12	4	2	1	64	<=0.5	4	<=2	1	1	<=4
515	Enterococcus	faecium	323	2008	Animal feed	Animal feed (for unspecified animal species)	<=128	256	<=512	<=0.5	0.12	2	2	1	16	1	4	4	1	1	<=4
516	Enterococcus	faecium	323	2008	Animal feed	Animal feed (for unspecified animal species)	<=128	<=128	<=512	<=0.5	0.03	2	2	4	32	2	4	4	1	2	<=4
517	Enterococcus	faecium	323	2008	Animal feed	Animal feed (for unspecified animal species)	<=128	<=128	<=512	<=0.5	0.06	2	2	4	64	2	4	4	1	2	<=4
518	Enterococcus	faecium	326	2008	Animal feed	Ingredient	<=128	<=128	<=512	<=0.5	0.03	4	2	4	64	2	8	4	2	2	<=4
519	Enterococcus	faecium	326	2008	Animal feed	Ingredient	<=128	256	<=512	<=0.5	0.12	2	2	8	64	2	4	4	2	2	<=4
520	Enterococcus	faecium	326	2008	Animal feed	Ingredient	<=128	256	<=512	<=0.5	0.12	2	2	4	64	2	4	4	1	2	<=4
521	Enterococcus	faecium	326	2008	Animal feed	Ingredient	<=128	256	<=512	<=0.5	0.06	4	4	8	64	2	4	4	2	2	<=4
522	Enterococcus	faecium	329	2008	Pet food	Pet food/treat	<=128	<=128	<=512	<=0.5	0.03	2	4	4	32	2	4	8	0.5	2	<=4
523	Enterococcus	faecium	329	2008	Pet food	Pet food/treat	<=128	<=128	<=512	<=0.5	0.06	2	4	8	32	2	8	4	0.5	2	<=4
524	Enterococcus	faecium	333	2008	Pet food	Pet food/treat	<=128	256	<=512	<=0.5	0.12	2	2	4	64	2	4	8	1	2	<=4
525	Enterococcus		333	2008	Pet food	Pet food/treat	<=128	<=128	<=512	<=0.5	0.12	2	2	2	64	2	4	8	0.5	2	<=4
526	Enterococcus	faecium	333	2008	Pet food	Pet food/treat	<=128	256	<=512	<=0.5	0.12	2	2	2	64	2	4	4	1	1	16
527	Enterococcus	faecium	333	2008	Pet food	Pet food/treat	<=128	256	<=512	<=0.5	0.12	4	4	4	64	2	4	4	1	1	16
528	Enterococcus	faecium	335	2008	Pet food	Pet food/treat	<=128	<=128	<=512	<=0.5	0.06	2	2	4	64	2	4	4	0.5	2	<=4
529	Enterococcus	faecium	336	2008	Pet food	Pet food/treat	<=128	<=128	<=512	<=0.5	0.06	2	4	4	64	2	4	8	0.5	2	<=4
530	Enterococcus	faecium	336	2008	Pet food	Pet food/treat	<=128	256	<=512	<=0.5	0.12	2	4	4	>64	2	4	8	1	2	<=4
531	Enterococcus	faecium	336	2008	Pet food	Pet food/treat	<=128	256	<=512	<=0.5	0.12	2	4	4	64	2	4	4	0.5	2	<=4
532	Enterococcus	faecium	337	2008	Pet food	Pet food/treat	<=128	<=128	<=512	2	0.06	2	4	8	64	4	4	8	0.5	2	<=4
533	Enterococcus	faecium	337	2008	Pet food	Pet food/treat	<=128	<=128	<=512	2	0.06	4	2	8	64	2	4	8	0.5	2	<=4
534	Enterococcus	faecium	337	2008	Pet food	Pet food/treat	<=128	256	<=512	<=0.5	0.12	2	2	16	64	2	4	8	1	2	16
535	Enterococcus	faecium	338	2008	Pet food	Pet food/treat	<=128	<=128	<=512	<=0.5	0.12	2	4	1	64	2	8	8	0.5	2	<=4
536	Enterococcus	faecium	338	2008	Pet food	Pet food/treat	<=128	<=128	<=512	<=0.5	0.12	4	<=0.5	8	64	2	4	8	1	2	<=4
537	Enterococcus	faecium	339	2008	Pet food	Pet food/treat	<=128	<=128	<=512	<=0.5	0.06	4	2	4	64	2	4	4	2	2	<=4
538	Enterococcus	faecium	339	2008	Pet food	Pet food/treat	<=128	<=128	<=512	<=0.5	0.12	4	4	4	64	2	4	8	2	2	<=4
539	Enterococcus	faecium	339	2008	Pet food	Pet food/treat	<=128	<=128	<=512	<=0.5	0.12	2	4	4	64	2	8	4	0.5	2	<=4
540	Enterococcus	faecium	339	2008	Pet food	Pet food/treat	<=128	<=128	<=512	<=0.5	0.06	4	2	4	64	2	4	8	2	2	<=4
541	Enterococcus		341	2008	Pet food	Pet food/treat	<=128	<=128	<=512	<=0.5	0.12	1	4	4	64	2	4	4	1	2	<=4
542	Enterococcus	faecium	341	2008	Pet food	Pet food/treat	<=128	<=128	<=512	<=0.5	0.25	1	1	8	64	2	4	8	1	4	<=4
543	Enterococcus	faecium	341	2008	Pet food	Pet food/treat	<=128	<=128	<=512	<=0.5	0.06	2	4	4	64	2	8	8	2	2	<=4
544	Enterococcus	faecium	343	2008	Animal feed	Ingredient	<=128	<=128	<=512	<=0.5	0.12	4	2	1	64	1	2	4	1	1	<=4
545	Enterococcus	faecium	343	2008	Animal feed	Ingredient	<=128	<=128	<=512	<=0.5	0.12	2	2	8	32	2	4	8	1	2	<=4
546	Enterococcus	faecium	343	2008	Animal feed	Ingredient	<=128	<=128	<=512	<=0.5	0.12	2	4	8	32	2	4	8	1	2	<=4
547	Enterococcus	faecium	344	2008	Animal feed	Ingredient	<=128	256	<=512	1	0.06	2	2	2	64	4	4	8	4	1	<=4
548	Enterococcus	faecium	344	2008	Animal feed	Ingredient	<=128	<=128	<=512	<=0.5	0.06	4	2	8	64	4	8	8	4	2	<=4
549	Enterococcus	faecium	344	2008	Animal feed	Ingredient	<=128	<=128	<=512	<=0.5	0.12	4	1	8	64	2	4	8	1	2	<=4
550	Enterococcus	faecium	348	2008	Pet food	Pet food/treat	<=128	<=128	<=512	<=0.5	0.12	2	2	4	64	2	4	4	0.5	2	>32
551	Enterococcus	faecium	348	2008	Pet food	Pet food/treat	<=128	<=128	<=512	<=0.5	0.06	2	4	4	64	2	4	4	0.5	2	>32
552	Enterococcus	faecium	348	2008	Pet food	Pet food/treat	<=128	<=128	<=512	1	0.03	1	2	8	64	2	4	8	1	2	<=4
553	Enterococcus	faecium	349	2008	Pet food	Supplement for pets	<=128	<=128	<=512	<=0.5	0.06	1	2	8	64	2	1	4	1	2	<=4
554	Enterococcus	faecium	349	2008	Pet food	Supplement for pets	<=128	256	<=512	<=0.5	0.12	2	2	4	64	2	4	8	1	2	<=4
555	Enterococcus	faecium	349	2008	Pet food	Supplement for pets	<=128	256	<=512	1	0.12	1	2	16	>64	2	2	8	2	2	<=4
556	Enterococcus	faecium	351	2008	Pet food	Pet food/treat	<=128	256	<=512	1	0.06	2	4	8	64	2	8	8	2	2	<=4
557	Enterococcus	faecium	351	2008	Pet food	Pet food/treat	<=128	<=128	<=512	2	0.12	2	2	8	64	2	4	8	2	2	<=4
558	Enterococcus	faecium	351	2008	Pet food	Pet food/treat	<=128	256	<=512	1	0.12	4	4	8	64	2	2	8	4	2	<=4
559	Enterococcus	faecalis	354	2008	Pet food	Pet food/treat	<=128	<=128	<=512	4	0.12	1	1	2	16	1	4	4	2	4	<=4
560	Enterococcus	faecalis	354	2008	Pet food	Pet food/treat	<=128	<=128	<=512	4	0.12	1	1	2	16	1	8	8	1	4	<=4
561	Enterococcus	faecium	355	2008	Animal feed	Cattle feed	<=128	256	<=512	<=0.5	0.12	4	1	4	16	2	16	8	1	<=1	<=4
562	Enterococcus	faecium	355	2008	Animal feed	Cattle feed	<=128	<=128	<=512	<=0.5	0.12	2	1	4	16	2	8	8	1	<=1	<=4
563	Enterococcus	faecium	357	2009	Animal feed	Cattle feed	<=128	<=128	<=512	<=0.5	0.12	2	8	8	64	2	4	4	0.5	2	8
564	Enterococcus	faecium	357	2009	Animal feed	Cattle feed	<=128	256	<=512	1	0.12	2	4	2	>64	2	4	8	2	<=1	>32
566	Enterococcus	faecium	362	2009	Animal feed	Animal feed (for unspecified animal species)	<=128	<=128	<=512	1	0.06	4	4	2	64	2	4	4	1	1	<=1
567	Enterococcus	faecium	362	2009	Animal feed	Animal feed (for unspecified animal species)	<=128	<=128	<=512	1	0.06	4	2	2	64	2	4	8	1	1	<=1
568	Enterococcus	faecium	362	2009	Animal feed	Animal feed (for unspecified animal species)	<=128	<=128	<=512	1	0.06	2	4	1	64	2	4	4	0.5	1	<=1
569	Enterococcus	faecium	362	2009	Animal feed	Animal feed (for unspecified animal species)	<=128	<=128	<=512	0.5	0.06	2	4	1	64	2	8	4	0.5	1	<=1
570	Enterococcus	faecium	363	2009	Pet food	Pet food/treat	<=128	<=128	<=512	0.5	0.06	2	4	4	64	2	4	4	1	2	32
571	Enterococcus	faecium	363	2009	Pet food	Pet food/treat	<=128	<=128	<=512	0.5	0.06	2	2	4	64	1	4	4	1	2	32
572	Enterococcus	faecium	363	2009	Pet food	Pet food/treat	<=128	<=128	<=512	0.5	0.06	2	4	4	64	2	4	4	1	2	32
573	Enterococcus	faecium	363	2009	Pet food	Pet food/treat	<=128	<=128	<=512	0.5	0.06	2	4	4	64	2	4	4	1	2	32
574	Enterococcus	faecium	366	2009	Animal feed	Animal feed (for unspecified animal species)	<=128	<=128	<=512	0.5	0.06	4	2	8	>64	2	4	4	1	4	<=1
575	Enterococcus	faecium	366	2009	Animal feed	Animal feed (for unspecified animal species)	<=128	<=128	<=512	1	0.25	2	<=0.25	8	>64	1	4	4	0.5	4	<=1
576	Enterococcus	faecium	366	2009	Animal feed	Animal feed (for unspecified animal species)	<=128	<=128	<=512	1	0.06	4	<=0.25	4	>64	1	4	4	0.5	4	<=1
577	Enterococcus	faecium	369	2009	Animal feed	Feed for minor species	<=128	256	<=512	0.5	0.25	2	4	8	>64	2	2	4	2	2	>32
578	Enterococcus	faecium	369	2009	Animal feed	Feed for minor species	<=128	<=128	<=512	0.5	0.25	2	4	2	64	2	2	8	0.5	2	>32
579	Enterococcus	faecium	369	2009	Animal feed	Feed for minor species	<=128	<=128	<=512	0.5	0.25	2	4	8	64	2	4	8	1	2	>32
580	Enterococcus	faecium	369	2009	Animal feed	Feed for minor species	<=128	<=128	<=512	0.5	0.25	2	<=0.25	8	64	2	4	8	2	4	>32
581	Enterococcus	faecium	370	2009	Animal feed	Feed for minor species	<=128	1024	1024	0.5	0.25	1	4	4	64	2	4	8	4	2	>32
582	Enterococcus	faecium	370	2009	Animal feed	Feed for minor species	<=128	>1024	<=512	1	0.25	2	4	4	64	2	4	8	0.5	2	>32
583	Enterococcus	faecium	370	2009	Animal feed	Feed for minor species	<=128	>1024	2048	1	0.25	4	>8	>32	64	2	2	8	4	4	>32
584	Enterococcus	faecium	370	2009	Animal feed	Feed for minor species	<=128	256	<=512	0.5	0.25	2	2	4	64	2	8	8	0.5	2	>32
585	Enterococcus	faecium	374	2009	Pet food	Pet food/treat	<=128	512	<=512	0.5	0.12	2	<=0.25	2	64	2	4	8	0.5	2	>32
586	Enterococcus	faecium	374	2009	Pet food	Pet food/treat	<=128	512	<=512	0.5	0.25	0.5	<=0.25	8	64	2	4	8	2	4	>32
587	Enterococcus	faecium	374	2009	Pet food	Pet food/treat	<=128	512	<=512	0.5	0.12	4	<=0.25	2	64	2	4	8	2	2	>32
588	Enterococcus	faecium	375	2009	Animal feed	Poultry feed	<=128	512	<=512	0.5	0.12	4	4	8	>64	2	2	8	2	4	>32
589	Enterococcus	faecium	375	2009	Animal feed	Poultry feed	<=128	<=128	<=512	0.5	0.12	2	8	4	64	2	4	8	1	2	>32
590	Enterococcus	faecium	375	2009	Animal feed	Poultry feed	<=128	<=128	<=512	0.5	0.06	4	<=0.25	4	64	2	4	8	2	2	>32
591	Enterococcus	faecium	375	2009	Animal feed	Poultry feed	<=128	<=128	<=512	0.5	0.06	2	4	4	64	2	4	8	1	2	>32
592	Enterococcus	faecium	376	2009	Pet food	Pet food/treat	<=128	<=128	<=512	0.5	0.12	2	8	4	64	2	4	8	1	2	>32
593	Enterococcus	faecium	376	2009	Pet food	Pet food/treat	<=128	<=128	<=512	0.5	0.25	2	4	4	64	2	4	8	1	2	>32
594	Enterococcus	faecium	376	2009	Pet food	Pet food/treat	<=128	<=128	<=512	0.5	0.25	2	8	4	64	2	4	8	1	2	>32
595	Enterococcus	faecium	376	2009	Pet food	Pet food/treat	<=128	256	<=512	0.5	0.25	2	4	4	64	2	4	8	2	2	32
596	Enterococcus	faecium	377	2009	Pet food	Pet food/treat	<=128	256	<=512	0.5	0.25	2	4	4	64	2	8	8	0.5	2	>32
597	Enterococcus	faecium	377	2009	Pet food	Pet food/treat	<=128	256	<=512	0.5	0.25	2	4	4	64	2	4	8	0.5	2	>32
598	Enterococcus	faecium	377	2009	Pet food	Pet food/treat	<=128	256	<=512	0.5	0.25	2	8	4	64	2	4	8	1	2	32
599	Enterococcus	faecium	377	2009	Pet food	Pet food/treat	<=128	256	<=512	1	0.25	2	8	4	64	2	4	8	1	2	32
600	Enterococcus	faecium	378	2009	Animal feed	Ingredient	<=128	<=128	<=512	0.5	0.12	4	4	1	<=2	2	4	8	0.5	1	>32
601	Enterococcus	faecium	378	2009	Animal feed	Ingredient	<=128	<=128	<=512	0.5	0.12	4	4	8	64	2	4	8	1	2	>32
602	Enterococcus	faecium	378	2009	Animal feed	Ingredient	<=128	512	<=512	0.5	0.12	2	<=0.25	4	64	2	4	8	2	4	>32
603	Enterococcus	faecium	379	2009	Pet food	Pet food/treat	<=128	<=128	<=512	2	0.25	2	2	4	64	2	2	8	2	2	>32
604	Enterococcus	faecium	379	2009	Pet food	Pet food/treat	<=128	<=128	<=512	0.5	0.12	2	4	4	64	2	4	8	1	2	>32
605	Enterococcus	faecium	379	2009	Pet food	Pet food/treat	<=128	<=128	<=512	0.5	0.12	2	8	4	64	2	4	8	1	2	>32
606	Enterococcus	faecium	379	2009	Pet food	Pet food/treat	<=128	<=128	<=512	0.5	0.12	2	<=0.25	4	64	2	4	8	2	2	>32
607	Enterococcus	faecium	381	2009	Pet food	Pet food/treat	<=128	<=128	<=512	8	0.25	1	<=0.25	0.5	>64	2	2	8	4	<=0.5	>32
609	Enterococcus	faecium	381	2009	Pet food	Pet food/treat	<=128	<=128	<=512	2	0.12	1	<=0.25	1	8	2	2	8	4	<=0.5	>32
610	Enterococcus	faecium	381	2009	Pet food	Pet food/treat	<=128	<=128	<=512	2	0.12	2	<=0.25	1	>64	1	2	8	4	<=0.5	>32
611	Enterococcus	faecium	381	2009	Pet food	Pet food/treat	<=128	<=128	<=512	2	0.12	4	<=0.25	2	>64	2	8	8	4	<=0.5	>32
612	Enterococcus	faecium	383	2009	Pet food	Pet food/treat	<=128	1024	<=512	0.5	0.25	4	8	4	64	2	2	8	1	2	>32
613	Enterococcus	faecium	383	2009	Pet food	Pet food/treat	<=128	<=128	<=512	0.5	0.25	2	2	8	64	2	4	8	2	2	>32
614	Enterococcus	faecium	383	2009	Pet food	Pet food/treat	<=128	<=128	<=512	0.5	0.12	2	4	8	64	1	4	8	1	2	>32
615	Enterococcus	faecium	383	2009	Pet food	Pet food/treat	<=128	<=128	<=512	0.5	0.25	4	4	8	64	2	2	8	1	2	>32
616	Enterococcus	faecium	387	2009	Pet food	Pet food/treat	<=128	<=128	<=512	0.5	0.12	2	2	8	64	1	2	8	2	2	>32
618	Enterococcus	faecium	387	2009	Pet food	Pet food/treat	<=128	512	<=512	<=0.25	0.25	2	4	8	>64	2	2	8	2	4	>32
619	Enterococcus	faecium	387	2009	Pet food	Pet food/treat	<=128	<=128	<=512	0.5	0.12	1	<=0.25	8	64	2	4	8	1	4	>32
620	Enterococcus	faecium	387	2009	Pet food	Pet food/treat	<=128	<=128	<=512	0.5	0.25	1	<=0.25	8	64	2	4	8	1	4	>32
621	Enterococcus	faecium	390	2009	Pet food	Pet food/treat	<=128	512	<=512	0.5	0.12	2	8	8	64	2	2	8	0.5	4	>32
622	Enterococcus	faecium	390	2009	Pet food	Pet food/treat	<=128	<=128	<=512	0.5	0.12	4	4	8	64	2	4	8	1	2	>32
623	Enterococcus	faecium	399	2009	Pet food	Pet food/treat	<=128	<=128	<=512	0.5	0.06	4	2	8	64	2	4	8	2	2	>32
624	Enterococcus	faecium	408	2009	Pet food	Pet food/treat	<=128	256	<=512	0.5	0.06	4	4	8	64	2	4	4	1	2	16
625	Enterococcus	faecium	408	2009	Pet food	Pet food/treat	<=128	<=128	<=512	0.5	0.12	2	2	4	64	1	2	4	1	2	8
626	Enterococcus	faecium	421	2009	Pet food	Pet food/treat	<=128	<=128	<=512	0.5	0.12	2	<=0.25	4	64	2	4	4	1	2	>32
627	Enterococcus	faecium	422	2009	Animal feed	Swine feed	<=128	<=128	<=512	0.5	0.03	2	1	2	64	2	4	8	2	<=0.5	>32
628	Enterococcus	faecium	422	2009	Animal feed	Swine feed	<=128	<=128	<=512	0.5	0.12	2	1	2	64	2	2	4	2	<=0.5	>32
629	Enterococcus	faecium	428	2009	Pet food	Pet food/treat	<=128	512	<=512	2	0.12	8	8	8	64	2	8	8	4	4	>32
630	Enterococcus	faecium	428	2009	Pet food	Pet food/treat	<=128	512	<=512	1	0.06	8	8	16	64	2	8	8	4	4	>32
631	Enterococcus	gallinarum	429	2009	Pet food	Pet food/treat	<=128	256	<=512	1	0.06	4	2	4	>64	2	4	4	1	2	>32
632	Enterococcus	gallinarum	429	2009	Pet food	Pet food/treat	<=128	1024	<=512	1	0.12	4	4	4	>64	2	8	4	1	2	>32
633	Enterococcus	faecium	434	2009	Pet food	Pet food/treat	<=128	256	<=512	2	0.06	4	2	8	64	2	4	8	2	2	>32
634	Enterococcus	gallinarum	434	2009	Pet food	Pet food/treat	<=128	256	<=512	2	0.25	4	4	4	64	2	4	4	1	2	>32
635	Enterococcus	faecium	441	2009	Animal feed	Animal feed (for unspecified animal species)	<=128	<=128	<=512	0.5	0.12	4	4	8	64	2	4	8	4	2	32
636	Enterococcus	faecium	445	2009	Pet food	Pet food/treat	<=128	256	<=512	0.5	0.06	2	4	4	64	2	4	4	1	2	>32
637	Enterococcus	faecium	445	2009	Pet food	Pet food/treat	<=128	256	<=512	0.5	0.12	2	4	4	32	2	4	4	0.5	2	>32
638	Enterococcus	faecium	451	2009	Pet food	Supplement for pets	<=128	<=128	<=512	1	0.06	4	4	4	64	2	4	4	0.5	2	32
639	Enterococcus	faecium	454	2009	Animal feed	Animal feed (for unspecified animal species)	<=128	<=128	<=512	1	0.03	2	4	4	64	2	4	4	1	2	32
640	Enterococcus	faecium	454	2009	Animal feed	Animal feed (for unspecified animal species)	<=128	256	<=512	0.5	0.06	4	2	4	64	2	4	4	1	2	>32
641	Enterococcus	faecium	456	2009	Animal feed	Poultry feed	<=128	256	<=512	0.5	0.03	2	2	4	64	2	8	4	1	2	>32
642	Enterococcus	faecium	471	2009	Animal feed	Feed for minor species	<=128	<=128	<=512	1	0.06	8	2	8	64	2	4	8	4	2	>32
643	Enterococcus	faecium	476	2009	Animal feed	Ingredient	<=128	256	<=512	0.5	0.12	4	4	4	64	2	4	8	1	2	>32
644	Enterococcus	faecium	476	2009	Animal feed	Ingredient	<=128	256	<=512	0.5	0.12	2	2	4	64	2	4	8	0.5	2	>32
645	Enterococcus	faecium	477	2009	Pet food	Pet food/treat	<=128	<=128	<=512	0.5	0.12	2	1	8	64	2	8	8	1	2	>32
646	Enterococcus	faecium	478	2009	Animal feed	Poultry feed	<=128	<=128	<=512	0.5	0.03	2	<=0.25	8	64	2	4	8	1	2	>32
647	Enterococcus	faecium	478	2009	Animal feed	Poultry feed	<=128	256	<=512	0.5	0.06	2	4	2	64	2	4	4	2	1	>32
648	Enterococcus	faecium	482	2009	Pet food	Pet food/treat	<=128	>1024	<=512	0.5	0.12	4	8	8	64	2	8	8	1	4	>32
649	Enterococcus	faecium	482	2009	Pet food	Pet food/treat	<=128	256	<=512	0.5	0.06	4	<=0.25	8	64	2	4	8	1	4	<=1
650	Enterococcus	faecium	487	2009	Animal feed	Ingredient	<=128	<=128	<=512	0.5	0.06	2	2	4	64	2	4	8	0.5	2	>32
651	Enterococcus	faecium	487	2009	Animal feed	Ingredient	<=128	<=128	<=512	0.5	0.12	2	4	4	32	2	4	8	1	2	>32
652	Enterococcus	faecium	490	2009	Animal feed	Horse feed	<=128	512	<=512	1	0.06	2	<=0.25	8	64	2	4	8	1	4	>32
653	Enterococcus	faecium	492	2009	Pet food	Pet food/treat	<=128	<=128	<=512	0.5	0.03	2	2	8	64	2	8	8	1	2	>32
654	Enterococcus	faecium	493	2009	Animal feed	Poultry feed	<=128	<=128	<=512	0.5	0.06	4	2	4	64	2	4	8	2	2	>32
655	Enterococcus	faecium	497	2009	Animal feed	Animal feed (for unspecified animal species)	<=128	<=128	<=512	0.5	0.06	4	2	4	64	2	4	8	1	2	>32
656	Enterococcus	faecium	497	2009	Animal feed	Animal feed (for unspecified animal species)	<=128	512	<=512	1	0.06	4	4	8	64	2	4	8	2	2	>32
657	Enterococcus	faecium	498	2009	Animal feed	Cattle feed	<=128	<=128	<=512	2	0.12	4	2	2	64	2	8	8	>4	1	>32
658	Enterococcus	faecium	498	2009	Animal feed	Cattle feed	<=128	<=128	<=512	0.5	0.06	4	1	2	64	2	2	8	2	<=0.5	>32
659	Enterococcus	faecium	499	2009	Animal feed	Poultry feed	<=128	256	<=512	1	0.25	4	4	2	>64	2	4	8	1	1	>32
660	Enterococcus	faecium	499	2009	Animal feed	Poultry feed	<=128	<=128	<=512	2	0.06	4	2	2	64	2	4	8	>4	<=0.5	>32
661	Enterococcus	faecium	503	2009	Pet food	Pet food/treat	<=128	256	<=512	1	0.06	4	4	4	>64	2	4	8	1	2	>32
662	Enterococcus	faecium	503	2009	Pet food	Pet food/treat	<=128	1024	<=512	1	0.03	4	8	4	>64	2	8	8	1	2	>32
663	Enterococcus	gallinarum	504	2009	Pet food	Pet food/treat	<=128	256	<=512	1	0.12	4	4	4	>64	2	8	8	1	2	>32
664	Enterococcus	faecium	504	2009	Pet food	Pet food/treat	<=128	512	<=512	1	0.12	4	4	4	>64	2	8	8	1	2	>32
665	Enterococcus	faecium	507	2009	Pet food	Pet food/treat	<=128	256	<=512	0.5	0.06	2	<=0.25	8	64	2	2	8	1	2	>32
666	Enterococcus	faecium	519	2009	Pet food	Pet food/treat	<=128	<=128	<=512	<=0.25	0.06	1	<=0.25	8	64	2	2	4	1	2	>32
667	Enterococcus	faecium	525	2009	Pet food	Pet food/treat	<=128	256	<=512	0.5	0.03	2	2	2	64	2	4	8	1	1	>32
668	Enterococcus	faecium	526	2009	Animal feed	Animal feed (for unspecified animal species)	<=128	<=128	<=512	4	0.25	4	1	2	64	2	2	8	2	1	>32
669	Enterococcus	faecium	535	2009	Pet food	Pet food/treat	<=128	<=128	<=512	4	0.06	4	2	2	64	2	4	4	2	1	<=1
670	Enterococcus	hirae	535	2009	Pet food	Pet food/treat	<=128	<=128	<=512	1	0.06	4	>8	>32	32	1	1	8	0.5	4	<=1
671	Enterococcus	faecium	536	2009	Pet food	Pet food/treat	<=128	<=128	<=512	1	0.06	2	1	4	64	2	0.5	4	2	2	16
672	Enterococcus	faecium	536	2009	Pet food	Pet food/treat	<=128	<=128	<=512	2	0.06	4	2	4	64	2	4	4	1	2	<=1
673	Enterococcus	faecium	542	2009	Animal feed	Ingredient	<=128	<=128	<=512	2	0.12	4	2	8	64	1	4	4	2	2	<=1
674	Enterococcus	faecium	542	2009	Animal feed	Ingredient	<=128	<=128	<=512	0.5	0.06	1	<=0.25	8	64	1	4	4	1	4	<=1
675	Enterococcus	faecium	542	2009	Animal feed	Ingredient	<=128	<=128	<=512	0.5	0.06	2	<=0.25	4	64	1	4	4	1	2	<=1
676	Enterococcus	faecium	542	2009	Animal feed	Ingredient	<=128	<=128	<=512	1	0.06	2	<=0.25	4	64	2	8	4	1	2	<=1
677	Enterococcus	faecium	550	2009	Animal feed	Animal feed (for unspecified animal species)	<=128	<=128	<=512	0.5	0.06	2	2	4	64	2	4	4	1	2	<=1
678	Enterococcus	faecium	551	2009	Pet food	Pet food/treat	<=128	<=128	<=512	1	0.06	4	4	4	>64	1	4	4	1	2	<=1
679	Enterococcus	faecium	551	2009	Pet food	Pet food/treat	<=128	256	<=512	1	0.25	4	8	8	>64	2	4	4	1	2	<=1
680	Enterococcus	faecium	551	2009	Pet food	Pet food/treat	<=128	<=128	<=512	1	0.06	4	4	4	>64	2	4	4	1	2	<=1
682	Enterococcus	faecium	596	2009	Pet food	Pet food/treat	<=128	256	<=512	0.5	0.03	4	4	8	64	2	4	4	2	2	<=1
683	Enterococcus	faecium	596	2009	Pet food	Pet food/treat	<=128	256	<=512	0.5	0.12	2	<=0.25	8	64	1	4	8	2	2	<=1
684	Enterococcus	faecium	599	2009	Pet food	Supplement for pets	<=128	<=128	<=512	0.5	0.06	1	4	4	64	2	4	8	1	2	<=1
685	Enterococcus	faecium	599	2009	Pet food	Supplement for pets	<=128	<=128	<=512	0.5	0.03	1	4	4	64	1	2	4	1	2	<=1
686	Enterococcus	faecium	599	2009	Pet food	Supplement for pets	<=128	<=128	<=512	0.5	0.03	1	4	2	64	1	4	4	1	2	<=1
687	Enterococcus	faecium	599	2009	Pet food	Supplement for pets	<=128	>1024	<=512	0.5	0.03	2	2	2	64	1	4	4	1	2	<=1
688	Enterococcus	faecium	600	2009	Pet food	Pet food/treat	<=128	<=128	<=512	0.5	0.03	4	2	8	64	2	4	4	1	2	<=1
689	Enterococcus	faecium	602	2009	Pet food	Supplement for pets	<=128	256	<=512	0.5	0.03	2	2	2	64	1	4	4	2	1	<=1
690	Enterococcus	faecium	602	2009	Pet food	Supplement for pets	<=128	512	<=512	0.5	0.25	2	4	2	64	2	4	4	2	1	<=1
691	Enterococcus	faecium	603	2009	Pet food	Supplement for pets	<=128	256	<=512	0.5	0.06	1	2	2	64	2	4	4	2	1	<=1
692	Enterococcus	faecium	603	2009	Pet food	Supplement for pets	<=128	256	<=512	0.5	0.12	4	4	8	64	2	8	8	2	4	<=1
693	Enterococcus	faecium	606	2009	Pet food	Pet food/treat	<=128	256	<=512	0.5	0.03	2	2	8	64	2	8	4	0.5	2	<=1
694	Enterococcus	faecium	606	2009	Pet food	Pet food/treat	<=128	256	<=512	0.5	0.03	2	2	8	64	2	8	8	0.5	2	<=1
695	Enterococcus	faecium	609	2009	Animal feed	Feed for minor species	<=128	256	<=512	0.5	0.06	4	<=0.25	4	64	2	4	8	1	2	>32
696	Enterococcus	faecium	609	2009	Animal feed	Feed for minor species	<=128	1024	<=512	0.5	0.12	2	2	8	64	2	0.5	8	1	2	<=1
697	Enterococcus	faecium	609	2009	Animal feed	Feed for minor species	<=128	256	<=512	0.5	0.03	2	2	4	64	2	0.5	4	1	2	<=1
698	Enterococcus	faecium	610	2009	Animal feed	Cattle feed	<=128	256	<=512	0.5	0.25	2	<=0.25	8	64	2	4	8	1	2	>32
699	Enterococcus	faecium	610	2009	Animal feed	Cattle feed	<=128	256	<=512	0.5	0.12	4	4	4	64	1	2	4	1	2	<=1
700	Enterococcus	faecium	612	2009	Pet food	Pet food/treat	<=128	>1024	<=512	1	0.12	4	4	8	64	1	8	4	4	2	<=1
701	Enterococcus	faecium	612	2009	Pet food	Pet food/treat	<=128	1024	<=512	1	0.12	8	4	8	64	1	8	4	4	2	<=1
702	Enterococcus	faecium	614	2009	Pet food	Pet food/treat	<=128	256	<=512	0.5	0.06	4	<=0.25	8	64	2	4	8	1	2	<=1
703	Enterococcus	faecium	614	2009	Pet food	Pet food/treat	<=128	<=128	<=512	0.5	0.06	4	<=0.25	8	64	2	4	8	2	2	<=1
704	Enterococcus	faecium	617	2009	Pet food	Pet food/treat	<=128	<=128	<=512	0.5	0.06	2	0.5	1	>64	1	<=0.25	4	4	<=0.5	<=1
705	Enterococcus	faecium	619	2010	Animal feed	Ingredient	<=128	512	<=512	0.5	0.12	4	<=0.25	4	64	2	8	4	2	2	<=1
706	Enterococcus	faecium	621	2010	Animal feed	Ingredient	<=128	<=128	<=512	0.5	0.06	4	2	1	64	1	<=0.25	4	4	<=0.5	<=1
707	Enterococcus	faecium	621	2010	Animal feed	Ingredient	<=128	256	<=512	0.5	0.12	2	4	8	64	1	4	4	2	2	<=1
708	Enterococcus	faecium	621	2010	Animal feed	Ingredient	<=128	<=128	<=512	0.5	0.12	4	8	8	>64	1	4	4	4	2	<=1
709	Enterococcus	gallinarum	628	2010	Pet food	Pet food/treat	<=128	<=128	<=512	0.5	0.25	4	0.5	4	16	1	2	8	1	2	<=1
710	Enterococcus	gallinarum	628	2010	Pet food	Pet food/treat	<=128	<=128	<=512	0.5	0.06	8	1	2	16	2	1	8	1	2	<=1
711	Enterococcus	faecium	630	2010	Pet food	Pet food/treat	<=128	512	<=512	0.5	0.06	2	<=0.25	8	>64	2	4	8	1	2	<=1
712	Enterococcus	faecium	631	2010	Pet food	Pet food/treat	<=128	<=128	<=512	0.5	0.03	2	2	4	64	2	4	4	0.5	2	<=1
713	Enterococcus	faecium	631	2010	Pet food	Pet food/treat	<=128	<=128	<=512	0.5	0.03	2	4	4	64	2	4	8	0.5	2	<=1
714	Enterococcus	faecium	633	2010	Pet food	Pet food/treat	<=128	256	<=512	0.5	0.06	2	4	4	64	1	4	4	1	2	<=1
715	Enterococcus	faecium	633	2010	Pet food	Pet food/treat	<=128	256	<=512	0.5	0.06	2	4	4	64	2	4	4	1	2	<=1
716	Enterococcus	hirae	635	2010	Pet food	Supplement for pets	<=128	<=128	<=512	1	0.06	4	<=0.25	4	32	1	4	4	0.5	2	<=1
717	Enterococcus	faecium	635	2010	Pet food	Supplement for pets	<=128	512	<=512	0.5	0.06	4	<=0.25	8	>64	2	4	8	2	2	<=1
718	Enterococcus	faecium	637	2010	Pet food	Pet food/treat	<=128	256	<=512	1	0.06	4	2	4	>64	1	4	4	1	2	<=1
719	Enterococcus	faecium	640	2010	Pet food	Supplement for pets	<=128	256	<=512	2	0.06	4	2	8	64	2	8	8	>4	2	<=1
720	Enterococcus	faecium	640	2010	Pet food	Supplement for pets	<=128	256	<=512	1	0.03	4	4	8	64	2	4	8	2	2	<=1
721	Enterococcus	faecium	643	2010	Pet food	Pet food/treat	<=128	1024	<=512	1	0.12	2	2	2	>64	2	4	4	1	<=0.5	<=1
722	Enterococcus	faecium	643	2010	Pet food	Pet food/treat	<=128	1024	<=512	1	0.12	2	2	2	>64	2	4	4	1	<=0.5	<=1
723	Enterococcus	faecium	646	2010	Animal feed	Animal feed (for unspecified animal species)	<=128	512	<=512	1	0.06	4	>8	8	64	2	4	8	4	2	<=1
724	Enterococcus	faecium	646	2010	Animal feed	Animal feed (for unspecified animal species)	<=128	512	<=512	0.5	0.12	2	<=0.25	8	64	1	4	4	1	2	<=1
725	Enterococcus	faecium	646	2010	Animal feed	Animal feed (for unspecified animal species)	<=128	256	<=512	1	0.03	2	<=0.25	4	>64	1	4	4	0.5	2	<=1
726	Enterococcus	faecium	651	2010	Animal feed	Ingredient	<=128	<=128	<=512	0.5	0.03	2	2	4	64	1	2	4	0.5	2	<=1
727	Enterococcus	faecium	651	2010	Animal feed	Ingredient	<=128	<=128	<=512	1	0.12	4	0.5	4	64	2	4	8	2	2	<=1
728	Enterococcus	faecium	655	2010	Animal feed	Feed for minor species	<=128	256	<=512	0.5	0.06	2	4	4	64	2	4	4	1	2	>32
729	Enterococcus	faecium	655	2010	Animal feed	Feed for minor species	<=128	256	<=512	0.5	0.12	2	4	4	64	1	4	4	1	2	>32
730	Enterococcus	faecium	655	2010	Animal feed	Feed for minor species	<=128	256	<=512	0.5	0.25	2	4	8	64	1	8	8	1	2	>32
731	Enterococcus	faecium	656	2010	Animal feed	Feed for minor species	<=128	<=128	<=512	0.5	0.12	2	2	4	64	1	4	4	1	2	>32
732	Enterococcus	faecium	656	2010	Animal feed	Feed for minor species	<=128	256	<=512	0.5	0.12	2	2	2	64	1	4	4	0.5	<=0.5	<=1
733	Enterococcus	faecium	659	2010	Animal feed	Cattle feed	<=128	<=128	<=512	0.5	0.12	4	2	4	64	1	2	8	2	2	<=1
734	Enterococcus	faecium	659	2010	Animal feed	Cattle feed	<=128	256	<=512	0.5	0.06	2	<=0.25	8	64	1	4	4	1	2	<=1
735	Enterococcus	faecium	659	2010	Animal feed	Cattle feed	<=128	256	<=512	0.5	0.12	4	1	4	64	2	2	4	2	2	<=1
736	Enterococcus	faecium	661	2010	Animal feed	Animal feed (for unspecified animal species)	<=128	512	<=512	0.5	0.12	4	4	8	64	2	4	4	2	2	<=1
737	Enterococcus	faecium	661	2010	Animal feed	Animal feed (for unspecified animal species)	<=128	512	<=512	0.5	0.12	4	4	4	64	2	4	8	2	2	<=1
738	Enterococcus	faecium	662	2010	Pet food	Pet food/treat	<=128	<=128	<=512	0.5	0.12	2	<=0.25	4	64	1	4	4	1	2	<=1
739	Enterococcus	faecium	664	2010	Pet food	Pet food/treat	<=128	256	<=512	0.5	0.12	2	4	4	64	2	8	4	1	2	<=1
740	Enterococcus	faecium	664	2010	Pet food	Pet food/treat	<=128	256	<=512	0.5	0.12	2	4	2	64	2	4	4	1	2	<=1
741	Enterococcus	faecium	667	2010	Animal feed	Poultry feed	<=128	512	<=512	0.5	0.12	2	2	4	64	2	2	8	2	2	32
742	Enterococcus	faecium	667	2010	Animal feed	Poultry feed	<=128	<=128	2048	0.5	0.12	4	1	1	64	1	4	4	2	8	>32
743	Enterococcus	faecium	668	2010	Pet food	Pet food/treat	<=128	<=128	>2048	0.5	0.12	4	2	1	>64	1	4	4	1	8	>32
744	Enterococcus	faecium	668	2010	Pet food	Pet food/treat	<=128	<=128	2048	0.5	0.12	2	2	1	>64	1	4	4	1	8	>32
745	Enterococcus	faecium	669	2010	Pet food	Pet food/treat	<=128	256	<=512	0.5	0.12	4	4	2	64	1	4	8	1	<=0.5	<=1
746	Enterococcus	faecium	669	2010	Pet food	Pet food/treat	<=128	256	<=512	0.5	0.12	2	4	2	64	1	4	4	1	<=0.5	<=1
747	Enterococcus	faecium	670	2010	Pet food	Pet food/treat	<=128	256	<=512	1	0.03	2	0.5	8	64	1	<=0.25	4	1	2	<=1
748	Enterococcus	hirae	672	2010	Pet food	Pet food/treat	<=128	<=128	<=512	0.5	0.12	4	<=0.25	2	32	1	2	4	0.5	2	<=1
749	Enterococcus	faecium	672	2010	Pet food	Pet food/treat	<=128	256	<=512	0.5	0.12	2	2	2	64	2	4	8	1	1	<=1
750	Enterococcus	faecium	673	2010	Animal feed	Poultry feed	<=128	256	<=512	0.5	0.12	2	<=0.25	8	64	2	4	8	2	2	<=1
751	Enterococcus	faecium	673	2010	Animal feed	Poultry feed	<=128	256	<=512	0.5	0.12	2	2	8	64	2	4	8	2	2	<=1
752	Enterococcus	faecium	674	2010	Animal feed	Poultry feed	<=128	256	<=512	0.5	0.12	2	2	8	64	2	2	4	1	2	32
753	Enterococcus	faecium	674	2010	Animal feed	Poultry feed	<=128	256	1024	0.5	0.25	4	4	4	64	1	16	4	1	2	>32
754	Enterococcus	faecium	675	2010	Animal feed	Ingredient	<=128	<=128	<=512	0.5	0.06	2	4	2	64	1	4	4	1	<=0.5	<=1
755	Enterococcus	faecium	675	2010	Animal feed	Ingredient	<=128	256	<=512	0.5	0.12	2	2	8	64	2	2	8	2	2	<=1
756	Enterococcus	faecium	679	2010	Pet food	Pet food/treat	<=128	<=128	<=512	0.5	0.12	4	4	1	>64	1	4	4	>4	<=0.5	<=1
757	Enterococcus	faecium	679	2010	Pet food	Pet food/treat	<=128	<=128	<=512	2	0.12	4	2	2	64	2	4	8	1	<=0.5	<=1
758	Enterococcus	hirae	683	2010	Animal feed	Ingredient	<=128	<=128	<=512	1	0.06	4	<=0.25	2	32	1	4	4	0.5	2	<=1
759	Enterococcus	faecium	683	2010	Animal feed	Ingredient	<=128	256	<=512	0.5	0.12	4	<=0.25	8	64	2	4	8	1	2	<=1
760	Enterococcus	faecium	684	2010	Pet food	Pet food/treat	<=128	256	<=512	0.5	0.06	2	<=0.25	8	64	1	4	4	1	2	<=1
761	Enterococcus	faecium	684	2010	Pet food	Pet food/treat	<=128	256	<=512	0.5	0.12	4	>8	>32	64	1	0.5	8	0.5	4	>32
762	Enterococcus	faecium	686	2010	Animal feed	Animal feed (for unspecified animal species)	<=128	512	<=512	0.5	0.12	4	1	8	64	2	4	4	2	2	<=1
763	Enterococcus	faecium	686	2010	Animal feed	Animal feed (for unspecified animal species)	<=128	256	<=512	0.5	0.06	2	<=0.25	4	64	2	2	4	1	2	<=1
764	Enterococcus	faecium	688	2010	Animal feed	Feed for minor species	<=128	512	<=512	0.5	0.06	2	2	8	64	1	4	4	1	2	<=1
765	Enterococcus	faecium	688	2010	Animal feed	Feed for minor species	<=128	<=128	<=512	0.5	0.06	1	<=0.25	8	64	2	4	8	1	2	<=1
766	Enterococcus	faecium	689	2010	Animal feed	Poultry feed	<=128	256	<=512	0.5	0.12	1	<=0.25	4	64	1	4	4	1	2	<=1
767	Enterococcus	faecium	690	2010	Pet food	Pet food/treat	<=128	512	<=512	0.5	0.12	4	4	8	64	1	4	8	2	2	>32
768	Enterococcus	faecium	690	2010	Pet food	Pet food/treat	<=128	<=128	<=512	0.5	0.12	2	1	1	64	1	2	4	4	<=0.5	<=1
769	Enterococcus	faecium	691	2010	Animal feed	Animal feed (for unspecified animal species)	<=128	256	<=512	0.5	0.12	4	<=0.25	4	64	1	4	4	1	2	<=1
770	Enterococcus	faecium	691	2010	Animal feed	Animal feed (for unspecified animal species)	<=128	256	<=512	0.5	0.12	4	2	4	64	1	2	4	1	2	<=1
771	Enterococcus	faecium	692	2010	Animal feed	Cattle feed	<=128	<=128	<=512	0.5	0.12	1	4	2	64	1	2	4	0.5	2	<=1
772	Enterococcus	faecium	692	2010	Animal feed	Cattle feed	<=128	<=128	<=512	2	0.12	4	1	4	64	1	2	4	>4	2	<=1
773	Enterococcus	faecium	693	2010	Animal feed	Poultry feed	<=128	<=128	<=512	0.5	0.12	2	4	4	>64	1	8	4	0.5	2	>32
774	Enterococcus	faecium	693	2010	Animal feed	Poultry feed	<=128	512	<=512	0.5	0.06	2	<=0.25	4	64	1	4	4	1	2	<=1
775	Enterococcus	faecium	702	2010	Pet food	Pet food/treat	<=128	<=128	<=512	0.5	0.12	4	2	8	64	2	<=0.25	8	0.5	2	<=1
776	Enterococcus	faecium	703	2010	Pet food	Pet food/treat	<=128	<=128	<=512	0.5	0.12	1	4	8	64	1	2	8	1	2	<=1
777	Enterococcus	faecium	703	2010	Pet food	Pet food/treat	<=128	<=128	<=512	0.5	0.12	2	<=0.25	4	64	2	4	8	1	2	<=1
778	Enterococcus	faecium	705	2010	Animal feed	Swine feed	<=128	512	<=512	1	0.25	4	4	8	64	1	4	8	2	2	<=1
779	Enterococcus	faecium	706	2010	Pet food	Pet food/treat	<=128	<=128	<=512	0.5	0.12	4	<=0.25	4	64	1	2	8	2	2	<=1
780	Enterococcus	faecium	706	2010	Pet food	Pet food/treat	<=128	<=128	<=512	0.5	0.06	4	<=0.25	4	64	2	2	8	2	2	<=1
781	Enterococcus	faecium	706	2010	Pet food	Pet food/treat	<=128	<=128	<=512	1	0.06	4	<=0.25	4	64	1	2	8	2	2	<=1
782	Enterococcus	durans	712	2010	Animal feed	Animal feed (for unspecified animal species)	<=128	<=128	<=512	0.5	0.12	0.5	<=0.25	2	64	1	0.5	8	0.5	2	32
783	Enterococcus	faecium	713	2010	Animal feed	Horse feed	<=128	256	<=512	0.5	0.12	4	1	8	64	1	4	8	2	2	<=1
784	Enterococcus	faecium	713	2010	Animal feed	Horse feed	<=128	<=128	<=512	0.5	0.03	2	4	4	64	2	4	8	0.5	2	<=1
785	Enterococcus	faecalis	714	2010	Pet food	Pet food/treat	<=128	<=128	<=512	1	0.06	0.5	>8	>32	8	1	4	8	1	8	>32
786	Enterococcus	faecium	715	2010	Pet food	Pet food/treat	<=128	256	<=512	0.5	0.12	2	<=0.25	4	64	1	2	8	2	2	<=1
787	Enterococcus	faecium	715	2010	Pet food	Pet food/treat	<=128	<=128	2048	1	0.25	2	2	8	64	2	4	8	1	2	>32
788	Enterococcus	faecium	718	2010	Pet food	Pet food/treat	<=128	256	<=512	0.5	0.06	4	2	2	64	2	4	8	1	1	<=1
789	Enterococcus	faecium	719	2010	Pet food	Pet food/treat	<=128	256	<=512	0.5	0.06	2	4	8	>64	1	2	8	1	2	<=1
790	Enterococcus	faecium	719	2010	Pet food	Pet food/treat	<=128	<=128	<=512	0.5	0.06	2	2	4	64	1	4	4	1	2	>32
791	Enterococcus	faecium	720	2010	Pet food	Pet food/treat	<=128	256	<=512	0.5	0.25	4	4	4	64	1	4	8	1	2	>32
792	Enterococcus	faecium	721	2010	Pet food	Pet food/treat	<=128	<=128	<=512	0.5	0.12	2	4	4	64	1	4	8	1	2	>32
793	Enterococcus	faecium	724	2010	Pet food	Pet food/treat	<=128	1024	<=512	1	0.12	4	4	8	64	2	4	8	2	2	<=1
794	Enterococcus	faecium	724	2010	Pet food	Pet food/treat	<=128	512	<=512	1	0.12	4	>8	8	64	2	4	8	2	2	<=1
795	Enterococcus	faecium	728	2010	Pet food	Pet food/treat	<=128	256	<=512	0.5	0.12	2	2	8	64	1	4	8	1	2	<=1
796	Enterococcus	faecium	729	2010	Animal feed	Cattle feed	<=128	512	<=512	0.5	0.25	4	8	8	64	1	2	8	1	2	<=1
797	Enterococcus	faecium	729	2010	Animal feed	Cattle feed	<=128	512	<=512	1	0.25	4	8	8	64	1	2	8	1	2	2
798	Enterococcus	faecium	731	2010	Animal feed	Horse feed	<=128	<=128	<=512	0.5	0.03	4	2	4	64	1	2	8	0.5	2	<=1
799	Enterococcus	faecium	736	2010	Animal feed	Feed for minor species	<=128	<=128	<=512	0.5	0.12	4	4	8	64	1	4	8	0.5	2	>32
800	Enterococcus	faecium	737	2010	Animal feed	Poultry feed	<=128	256	<=512	0.5	0.12	2	<=0.25	8	64	1	4	8	2	2	<=1
801	Enterococcus	faecium	737	2010	Animal feed	Poultry feed	<=128	<=128	<=512	1	0.06	1	2	2	64	1	2	8	1	1	>32
802	Enterococcus	durans	738	2010	Animal feed	Poultry feed	<=128	<=128	<=512	0.5	0.12	2	<=0.25	2	>64	1	0.5	4	0.5	1	<=1
803	Enterococcus	faecium	739	2010	Animal feed	Animal feed (for unspecified animal species)	<=128	256	<=512	0.5	0.06	4	<=0.25	8	64	2	4	8	2	2	<=1
804	Enterococcus	faecium	739	2010	Animal feed	Animal feed (for unspecified animal species)	<=128	<=128	<=512	0.5	0.12	2	2	8	64	1	4	4	1	2	>32
805	Enterococcus	faecium	740	2010	Animal feed	Animal feed (for unspecified animal species)	<=128	<=128	<=512	0.5	0.06	2	<=0.25	8	64	1	4	4	2	2	<=1
806	Enterococcus	faecium	740	2010	Animal feed	Animal feed (for unspecified animal species)	<=128	<=128	<=512	0.5	0.12	2	2	1	64	1	4	4	2	1	<=1
807	Enterococcus	faecium	741	2010	Animal feed	Animal feed (for unspecified animal species)	<=128	<=128	<=512	0.5	0.12	4	4	8	64	2	8	4	1	2	<=1
808	Enterococcus	faecium	741	2010	Animal feed	Animal feed (for unspecified animal species)	<=128	<=128	<=512	0.5	0.12	4	2	4	>64	1	4	4	2	2	<=1
809	Enterococcus	faecium	744	2010	Pet food	Supplement for pets	<=128	<=128	<=512	0.5	0.12	2	2	1	>64	2	2	4	4	<=0.5	>32
810	Enterococcus	faecium	749	2010	Pet food	Pet food/treat	<=128	<=128	<=512	0.5	0.06	4	<=0.25	8	64	2	4	4	2	2	<=1
811	Enterococcus	faecium	749	2010	Pet food	Pet food/treat	<=128	256	<=512	0.5	0.12	4	<=0.25	4	64	2	8	4	2	2	<=1
812	Enterococcus	faecium	750	2010	Pet food	Pet food/treat	<=128	<=128	<=512	0.5	0.12	4	4	8	64	2	4	4	>4	4	16
813	Enterococcus	faecium	751	2010	Animal feed	Feed for minor species	<=128	<=128	<=512	0.5	0.12	2	<=0.25	8	>64	1	8	4	1	2	>32
814	Enterococcus	faecium	751	2010	Animal feed	Feed for minor species	<=128	<=128	<=512	0.5	0.12	4	0.5	8	>64	2	8	4	2	4	>32
815	Enterococcus	faecium	757	2010	Animal feed	Horse feed	<=128	<=128	<=512	0.5	0.06	2	<=0.25	8	64	1	4	4	2	4	<=1
816	Enterococcus	faecium	762	2010	Animal feed	Ingredient	<=128	256	<=512	0.5	0.06	1	<=0.25	8	64	1	4	4	2	4	<=1
817	Enterococcus	faecium	765	2010	Animal feed	Cattle feed	<=128	<=128	<=512	0.5	0.12	2	2	8	64	1	4	4	1	2	>32
818	Enterococcus	faecium	765	2010	Animal feed	Cattle feed	<=128	256	<=512	1	0.06	4	4	8	64	2	4	4	2	2	<=1
819	Enterococcus	faecium	766	2010	Pet food	Pet food/treat	<=128	<=128	<=512	0.5	0.12	2	4	2	>64	1	4	4	1	2	>32
820	Enterococcus	faecium	768	2010	Animal feed	Cattle feed	<=128	<=128	<=512	0.5	0.12	4	<=0.25	8	64	1	2	4	2	4	>32
821	Enterococcus	faecium	768	2010	Animal feed	Cattle feed	<=128	<=128	<=512	0.5	0.12	2	4	8	64	1	2	4	2	2	>32
822	Enterococcus	faecium	773	2010	Pet food	Pet food/treat	<=128	<=128	<=512	1	0.06	4	2	8	>64	2	4	4	1	2	<=1
823	Enterococcus	faecium	773	2010	Pet food	Pet food/treat	<=128	256	<=512	0.5	0.06	2	4	4	64	2	4	4	1	2	<=1
824	Enterococcus	faecium	777	2010	Pet food	Pet food/treat	<=128	<=128	<=512	1	0.06	4	4	4	>64	2	4	4	1	2	<=1
825	Enterococcus	faecium	777	2010	Pet food	Pet food/treat	<=128	<=128	<=512	1	0.06	4	4	4	>64	2	4	4	1	2	<=1
826	Enterococcus	hirae	779	2010	Animal feed	Animal feed (for unspecified animal species)	<=128	<=128	<=512	0.5	0.12	8	<=0.25	2	32	2	1	4	1	2	<=1
827	Enterococcus	hirae	779	2010	Animal feed	Animal feed (for unspecified animal species)	<=128	<=128	<=512	0.5	0.06	4	<=0.25	2	32	1	1	4	0.5	2	<=1
828	Enterococcus	faecium	780	2010	Pet food	Supplement for pets	<=128	<=128	<=512	0.5	0.06	4	1	2	64	1	4	4	4	2	32
829	Enterococcus	faecium	780	2010	Pet food	Supplement for pets	<=128	<=128	<=512	0.5	0.12	4	2	1	>64	2	8	4	4	<=0.5	<=1
830	Enterococcus	faecium	783	2010	Animal feed	Medicated feed	<=128	<=128	<=512	0.5	0.06	2	<=0.25	4	64	2	4	4	2	2	<=1
831	Enterococcus	faecium	788	2010	Pet food	Pet food/treat	<=128	<=128	<=512	0.5	0.06	2	<=0.25	8	64	2	4	4	2	4	<=1
832	Enterococcus	faecium	788	2010	Pet food	Pet food/treat	<=128	<=128	<=512	0.5	0.06	2	2	2	>64	1	0.5	4	4	<=0.5	<=1
833	Enterococcus	faecium	789	2010	Animal feed	Cattle feed	<=128	<=128	<=512	0.5	0.06	2	2	1	64	1	4	4	0.5	2	<=1
834	Enterococcus	faecium	789	2010	Animal feed	Cattle feed	<=128	<=128	<=512	1	0.06	2	2	4	>64	2	2	4	1	2	<=1
835	Enterococcus	faecium	791	2010	Animal feed	Cattle feed	<=128	256	<=512	0.5	0.06	4	2	8	64	2	4	4	2	4	<=1
836	Enterococcus	faecium	795	2010	Animal feed	Medicated feed	<=128	<=128	<=512	0.5	0.06	4	2	4	>64	1	4	4	1	2	<=1
837	Enterococcus	faecium	795	2010	Animal feed	Medicated feed	<=128	256	<=512	0.5	0.06	2	4	8	64	1	2	4	2	2	<=1
838	Enterococcus	faecium	796	2010	Animal feed	Ingredient	<=128	<=128	<=512	0.5	0.06	2	2	4	64	1	4	4	1	2	>32
839	Enterococcus	faecium	796	2010	Animal feed	Ingredient	<=128	<=128	<=512	0.5	0.25	2	1	1	>64	1	4	4	4	<=0.5	>32
840	Enterococcus	faecium	799	2010	Animal feed	Poultry feed	<=128	<=128	<=512	0.5	0.06	2	1	4	64	2	4	4	1	2	<=1
841	Enterococcus	faecium	799	2010	Animal feed	Poultry feed	<=128	<=128	<=512	0.5	0.12	4	<=0.25	8	64	2	8	4	2	4	<=1
842	Enterococcus	faecium	799	2010	Animal feed	Poultry feed	<=128	<=128	<=512	1	0.06	4	2	4	64	1	2	4	2	2	<=1
843	Enterococcus	faecium	800	2010	Animal feed	Cattle feed	<=128	<=128	<=512	0.5	0.06	4	2	4	64	1	4	4	4	2	<=1
844	Enterococcus	faecium	801	2010	Animal feed	Cattle feed	<=128	<=128	<=512	0.5	0.06	4	4	4	64	2	2	4	1	2	<=1
845	Enterococcus	faecium	801	2010	Animal feed	Cattle feed	<=128	<=128	<=512	0.5	0.12	4	2	4	64	1	4	4	1	2	>32
846	Enterococcus	faecium	802	2010	Animal feed	Cattle feed	<=128	<=128	<=512	0.5	0.06	2	<=0.25	8	64	2	4	4	2	2	<=1
847	Enterococcus	faecium	802	2010	Animal feed	Cattle feed	<=128	<=128	<=512	1	0.25	4	2	4	>64	1	8	4	4	2	>32
848	Enterococcus	faecium	803	2010	Animal feed	Cattle feed	<=128	<=128	<=512	0.5	0.06	4	2	4	64	1	4	4	0.5	2	<=1
849	Enterococcus	faecium	803	2010	Animal feed	Cattle feed	<=128	<=128	<=512	0.5	0.06	2	4	4	64	1	4	4	0.5	2	<=1
850	Enterococcus	faecium	804	2010	Animal feed	Ingredient	<=128	<=128	<=512	1	0.06	1	2	4	64	1	4	4	2	2	<=1
851	Enterococcus	faecium	804	2010	Animal feed	Ingredient	<=128	256	<=512	0.5	0.25	2	<=0.25	1	>64	1	8	4	1	<=0.5	<=1
852	Enterococcus	faecium	807	2010	Animal feed	Ingredient	<=128	256	<=512	1	0.06	4	2	4	64	2	4	4	4	2	<=1
853	Enterococcus	faecium	810	2010	Animal feed	Ingredient	<=128	256	<=512	0.5	0.12	0.5	<=0.25	8	>64	2	4	4	2	2	<=1
854	Enterococcus	faecium	810	2010	Animal feed	Ingredient	<=128	<=128	<=512	0.5	0.06	4	2	4	64	1	4	4	2	2	<=1
855	Enterococcus	faecium	811	2010	Pet food	Pet food/treat	<=128	<=128	<=512	0.5	0.06	2	1	1	64	2	4	4	4	<=0.5	<=1
856	Enterococcus	faecium	811	2010	Pet food	Pet food/treat	<=128	<=128	<=512	0.5	0.06	2	<=0.25	4	>64	2	2	4	2	2	<=1
857	Enterococcus	faecium	813	2010	Animal feed	Ingredient	<=128	<=128	<=512	0.5	0.06	0.5	<=0.25	8	64	1	4	4	1	2	<=1
858	Enterococcus	faecium	813	2010	Animal feed	Ingredient	<=128	<=128	<=512	1	0.12	4	2	8	>64	2	4	4	1	2	<=1
859	Enterococcus	faecium	814	2010	Pet food	Pet food/treat	<=128	<=128	<=512	0.5	0.06	2	2	2	64	1	4	4	1	2	>32
860	Enterococcus	faecium	814	2010	Pet food	Pet food/treat	<=128	<=128	<=512	0.5	0.06	4	<=0.25	8	>64	2	2	4	1	4	<=1
861	Enterococcus	faecium	815	2010	Pet food	Pet food/treat	<=128	<=128	<=512	0.5	0.06	2	2	2	64	2	<=0.25	4	1	1	<=1
862	Enterococcus	faecium	815	2010	Pet food	Pet food/treat	<=128	<=128	<=512	0.5	0.06	4	4	2	64	1	4	4	1	2	<=1
863	Enterococcus	faecium	818	2010	Pet food	Pet food/treat	<=128	<=128	<=512	0.5	0.06	1	<=0.25	4	64	2	2	4	2	2	<=1
864	Enterococcus	faecium	818	2010	Pet food	Pet food/treat	<=128	<=128	<=512	0.5	0.12	2	<=0.25	8	64	1	4	4	2	2	<=1
865	Enterococcus	faecium	819	2010	Animal feed	Ingredient	<=128	256	<=512	1	0.06	2	2	1	64	2	4	4	2	1	<=1
866	Enterococcus	faecium	819	2010	Animal feed	Ingredient	<=128	<=128	<=512	1	0.06	4	<=0.25	8	64	1	4	4	1	2	<=1
867	Enterococcus	faecium	820	2010	Animal feed	Ingredient	<=128	<=128	<=512	0.5	0.06	4	2	4	64	2	4	4	1	2	<=1
868	Enterococcus	faecium	820	2010	Animal feed	Ingredient	<=128	<=128	<=512	1	0.06	4	2	2	64	2	4	4	0.5	1	<=1
869	Enterococcus	faecium	821	2010	Animal feed	Ingredient	<=128	<=128	<=512	0.5	0.12	4	2	4	64	2	4	4	1	2	<=1
870	Enterococcus	faecium	821	2010	Animal feed	Ingredient	<=128	<=128	<=512	0.5	0.06	4	4	4	64	2	4	4	1	2	<=1
871	Enterococcus	faecium	824	2010	Animal feed	Cattle feed	<=128	<=128	<=512	0.5	0.06	4	2	4	64	1	4	4	2	2	<=1
872	Enterococcus	faecium	824	2010	Animal feed	Cattle feed	<=128	256	<=512	0.5	0.12	2	2	4	64	1	4	4	0.5	2	<=1
873	Enterococcus	faecium	827	2010	Pet food	Pet food/treat	<=128	<=128	<=512	0.5	0.06	2	2	4	64	2	4	4	0.5	2	<=1
874	Enterococcus	faecium	827	2010	Pet food	Pet food/treat	<=128	256	<=512	0.5	0.06	2	4	1	64	1	4	4	2	2	<=1
875	Enterococcus	faecium	830	2010	Animal feed	Cattle feed	<=128	<=128	<=512	0.5	0.06	4	4	2	>64	2	4	4	0.5	2	<=1
876	Enterococcus	faecium	831	2010	Animal feed	Cattle feed	<=128	<=128	<=512	0.5	0.25	1	2	8	>64	2	4	4	1	4	<=1
877	Enterococcus	faecium	834	2010	Animal feed	Feed for minor species	<=128	<=128	<=512	0.5	0.06	4	2	1	>64	1	4	4	>4	<=0.5	<=1
878	Enterococcus	faecium	834	2010	Animal feed	Feed for minor species	<=128	<=128	<=512	0.5	0.25	4	2	4	64	1	2	4	1	8	>32
879	Enterococcus	faecium	836	2010	Pet food	Pet food/treat	<=128	<=128	<=512	0.5	0.06	1	<=0.25	8	64	2	4	4	2	4	<=1
880	Enterococcus	faecium	836	2010	Pet food	Pet food/treat	<=128	<=128	<=512	0.5	0.06	2	2	2	64	1	4	4	1	2	<=1
881	Enterococcus	faecium	837	2010	Animal feed	Ingredient	<=128	<=128	<=512	0.5	0.12	2	4	4	64	2	4	4	1	2	>32
882	Enterococcus	faecium	838	2010	Animal feed	Feed for minor species	<=128	>1024	2048	0.5	0.12	2	>8	>32	64	1	4	8	2	4	>32
883	Enterococcus	faecium	838	2010	Animal feed	Feed for minor species	<=128	256	<=512	0.5	0.12	1	>8	>32	>64	1	2	8	2	4	>32
884	Enterococcus	faecium	843	2010	Pet food	Pet food/treat	<=128	<=128	<=512	0.5	0.06	2	2	4	64	1	2	4	2	2	<=1
885	Enterococcus	faecium	846	2010	Animal feed	Cattle feed	<=128	<=128	<=512	0.5	0.06	2	1	1	64	1	0.5	4	4	<=0.5	<=1
886	Enterococcus	faecium	846	2010	Animal feed	Cattle feed	<=128	<=128	<=512	0.5	0.12	4	4	2	64	2	4	4	1	1	<=1
887	Enterococcus	faecium	846	2010	Animal feed	Cattle feed	<=128	<=128	<=512	0.5	0.06	4	2	4	>64	1	4	4	1	2	<=1
888	Enterococcus	faecium	848	2010	Animal feed	Feed for minor species	<=128	<=128	<=512	0.5	0.06	4	2	1	>64	2	4	4	>4	<=0.5	<=1
889	Enterococcus	faecium	849	2010	Pet food	Pet food/treat	<=128	<=128	<=512	0.5	0.12	2	2	2	64	1	4	4	1	2	<=1
890	Enterococcus	faecium	849	2010	Pet food	Pet food/treat	<=128	256	<=512	1	0.12	8	4	8	64	1	8	4	4	4	<=1
891	Enterococcus	faecium	849	2010	Pet food	Pet food/treat	<=128	<=128	<=512	1	0.06	<=0.25	4	0.5	32	<=0.5	2	<=2	>4	<=0.5	32
892	Enterococcus	faecium	852	2010	Animal feed	Animal feed (for unspecified animal species)	<=128	<=128	<=512	1	0.12	4	4	2	64	2	4	4	1	1	<=1
893	Enterococcus	faecium	852	2010	Animal feed	Animal feed (for unspecified animal species)	<=128	<=128	<=512	2	0.12	4	1	4	64	1	4	4	>4	2	<=1
894	Enterococcus	faecium	853	2010	Animal feed	Cattle feed	<=128	<=128	<=512	0.5	0.12	4	1	4	>64	2	4	8	4	2	<=1
895	Enterococcus	faecium	853	2010	Animal feed	Cattle feed	<=128	<=128	<=512	0.5	0.12	2	2	4	64	2	4	8	1	2	<=1
896	Enterococcus	faecium	858	2010	Animal feed	Medicated feed	<=128	<=128	<=512	0.5	0.12	2	4	4	64	2	4	8	2	2	32
897	Enterococcus	faecium	858	2010	Animal feed	Medicated feed	<=128	<=128	<=512	0.5	0.06	2	2	2	64	2	4	4	1	1	<=1
898	Enterococcus	faecium	859	2010	Animal feed	Cattle feed	<=128	<=128	<=512	0.5	0.06	1	<=0.25	8	64	1	2	4	1	4	<=1
899	Enterococcus	faecium	859	2010	Animal feed	Cattle feed	<=128	<=128	<=512	0.5	0.06	4	1	1	64	1	4	4	2	<=0.5	<=1
900	Enterococcus	faecium	862	2010	Pet food	Pet food/treat	<=128	<=128	<=512	0.5	0.06	4	<=0.25	2	64	1	2	4	2	2	<=1
901	Enterococcus	faecium	867	2010	Animal feed	Cattle feed	<=128	<=128	<=512	0.5	0.06	2	2	1	64	2	4	4	1	1	<=1
902	Enterococcus	durans	867	2010	Animal feed	Cattle feed	<=128	<=128	<=512	0.5	0.12	2	<=0.25	2	64	2	2	4	1	2	>32
903	Enterococcus	faecium	868	2010	Animal feed	Swine feed	<=128	256	<=512	0.5	0.06	4	1	8	64	2	4	4	1	4	<=1
904	Enterococcus	faecium	868	2010	Animal feed	Swine feed	<=128	<=128	<=512	0.5	0.06	2	4	1	>64	1	4	4	2	<=0.5	<=1
905	Enterococcus	faecium	869	2010	Animal feed	Ingredient	<=128	<=128	<=512	0.5	0.12	2	2	8	64	1	4	4	2	2	<=1
906	Enterococcus	faecium	869	2010	Animal feed	Ingredient	<=128	<=128	<=512	0.5	0.25	1	2	8	64	2	4	4	2	4	<=1
907	Enterococcus	faecium	870	2010	Animal feed	Medicated feed	<=128	<=128	<=512	0.5	0.12	1	>8	>32	64	1	8	8	0.5	4	>32
908	Enterococcus	faecium	871	2010	Animal feed	Poultry feed	<=128	256	<=512	1	0.06	2	<=0.25	8	64	2	8	4	2	4	<=1
909	Enterococcus	faecium	871	2010	Animal feed	Poultry feed	<=128	<=128	<=512	0.5	0.03	<=0.25	4	0.5	32	<=0.5	2	<=2	>4	<=0.5	32
910	Enterococcus	faecium	872	2010	Animal feed	Poultry feed	<=128	<=128	<=512	0.5	0.06	2	2	8	64	2	<=0.25	8	2	4	<=1
911	Enterococcus	faecium	872	2010	Animal feed	Poultry feed	<=128	<=128	<=512	0.5	0.06	4	1	4	64	2	16	4	1	2	<=1
912	Enterococcus	faecium	873	2010	Animal feed	Feed for minor species	<=128	<=128	<=512	1	0.06	4	2	8	>64	2	4	4	2	4	<=1
913	Enterococcus	faecium	873	2010	Animal feed	Feed for minor species	<=128	<=128	<=512	0.5	0.06	2	2	8	>64	2	2	4	2	2	<=1
914	Enterococcus	faecium	877	2010	Animal feed	Animal feed (for unspecified animal species)	<=128	<=128	<=512	0.5	0.06	2	2	8	64	2	2	4	1	4	<=1
915	Enterococcus	faecium	877	2010	Animal feed	Animal feed (for unspecified animal species)	<=128	256	<=512	0.5	0.06	2	<=0.25	8	64	2	2	8	2	4	<=1
916	Enterococcus	faecium	878	2010	Animal feed	Ingredient	<=128	<=128	<=512	0.5	0.06	4	4	1	>64	2	8	4	2	1	<=1
917	Enterococcus	faecium	878	2010	Animal feed	Ingredient	<=128	<=128	<=512	0.5	0.06	4	4	2	64	2	4	4	0.5	1	<=1
918	Enterococcus	faecium	881	2010	Pet food	Supplement for pets	<=128	<=128	<=512	1	0.06	4	2	4	>64	2	8	4	1	2	<=1
919	Enterococcus	faecium	881	2010	Pet food	Supplement for pets	<=128	<=128	<=512	0.5	0.03	4	4	4	>64	2	4	4	1	2	<=1
920	Enterococcus	faecium	889	2010	Animal feed	Cattle feed	<=128	<=128	<=512	0.5	0.06	4	4	2	>64	2	4	4	1	2	<=1
921	Enterococcus	faecium	889	2010	Animal feed	Cattle feed	<=128	<=128	<=512	0.5	0.12	2	2	4	64	1	4	4	1	2	<=1
922	Enterococcus	faecium	891	2010	Pet food	Supplement for pets	<=128	<=128	<=512	0.5	0.06	4	2	8	64	2	1	4	1	2	<=1
923	Enterococcus	faecium	891	2010	Pet food	Supplement for pets	<=128	<=128	<=512	0.5	0.06	4	2	2	64	2	<=0.25	4	1	2	<=1
924	Enterococcus	faecium	892	2010	Animal feed	Animal feed (for unspecified animal species)	<=128	<=128	<=512	0.5	0.06	2	2	2	64	1	4	4	4	<=0.5	<=1
925	Enterococcus	faecium	892	2010	Animal feed	Animal feed (for unspecified animal species)	<=128	<=128	<=512	0.5	0.06	2	<=0.25	4	64	2	4	4	2	2	<=1
926	Enterococcus	faecium	894	2010	Animal feed	Animal feed (for unspecified animal species)	<=128	256	<=512	1	0.06	4	4	8	64	2	4	4	2	2	<=1
927	Enterococcus	faecium	896	2010	Pet food	Pet food/treat	<=128	<=128	2048	0.5	0.12	4	<=0.25	2	64	1	4	4	4	2	>32
928	Enterococcus	faecium	897	2010	Animal feed	Animal feed (for unspecified animal species)	<=128	<=128	<=512	0.5	0.12	2	2	8	64	2	8	4	1	4	<=1
929	Enterococcus	faecium	898	2010	Animal feed	Poultry feed	<=128	<=128	<=512	0.5	0.12	2	4	4	>64	2	4	4	1	8	>32
930	Enterococcus	faecium	898	2010	Animal feed	Poultry feed	<=128	<=128	<=512	0.5	0.12	4	<=0.25	4	>64	2	4	4	1	8	>32
931	Enterococcus	faecium	901	2010	Animal feed	Medicated feed	<=128	<=128	<=512	0.5	0.06	4	4	8	>64	2	4	4	2	4	<=1
932	Enterococcus	faecium	901	2010	Animal feed	Medicated feed	<=128	<=128	<=512	0.5	0.06	4	4	8	64	2	4	4	1	2	<=1
933	Enterococcus	faecium	904	2010	Pet food	Pet food/treat	<=128	<=128	<=512	0.5	0.06	4	2	4	64	2	4	4	1	2	<=1
934	Enterococcus	faecium	907	2010	Pet food	Pet food/treat	<=128	<=128	<=512	1	0.06	4	1	2	64	1	2	4	4	<=0.5	<=1
935	Enterococcus	faecium	907	2010	Pet food	Pet food/treat	<=128	<=128	<=512	2	0.06	4	2	1	64	2	4	4	2	<=0.5	<=1
936	Enterococcus	faecium	913	2010	Pet food	Pet food/treat	<=128	<=128	<=512	0.5	0.12	4	<=0.25	8	64	2	4	4	1	4	>32
937	Enterococcus	faecium	913	2010	Pet food	Pet food/treat	<=128	<=128	<=512	1	0.06	4	4	4	>64	2	4	4	1	2	<=1
938	Enterococcus	faecium	915	2010	Animal feed	Ingredient	<=128	<=128	<=512	0.5	0.06	2	4	4	64	2	2	4	2	2	<=1
939	Enterococcus	faecium	915	2010	Animal feed	Ingredient	<=128	<=128	<=512	0.5	0.12	2	<=0.25	4	64	2	4	4	2	2	<=1
940	Enterococcus	faecium	916	2010	Pet food	Pet food/treat	<=128	<=128	<=512	0.5	0.06	2	4	8	64	2	8	4	2	2	<=1
941	Enterococcus	faecium	916	2010	Pet food	Pet food/treat	<=128	256	<=512	0.5	0.06	4	2	2	>64	2	8	4	2	1	<=1
942	Enterococcus	faecium	917	2010	Animal feed	Animal feed (for unspecified animal species)	<=128	<=128	<=512	0.5	0.12	4	<=0.25	2	64	2	4	4	2	<=0.5	<=1
943	Enterococcus	hirae	917	2010	Animal feed	Animal feed (for unspecified animal species)	<=128	<=128	<=512	0.5	0.06	4	<=0.25	2	32	1	2	4	1	2	<=1
944	Enterococcus	faecium	919	2010	Pet food	Pet food/treat	<=128	<=128	<=512	2	0.06	4	1	2	64	1	2	4	2	2	16
945	Enterococcus	faecium	921	2010	Animal feed	Ingredient	<=128	<=128	<=512	2	0.06	4	1	4	>64	2	1	4	2	2	<=1
946	Enterococcus	faecium	921	2010	Animal feed	Ingredient	<=128	<=128	<=512	0.5	0.06	2	<=0.25	2	64	2	4	4	1	<=0.5	<=1
947	Enterococcus	faecium	922	2010	Animal feed	Ingredient	<=128	<=128	<=512	0.5	0.06	2	2	1	64	1	4	4	2	1	<=1
948	Enterococcus	faecium	922	2010	Animal feed	Ingredient	<=128	<=128	<=512	0.5	0.06	4	2	2	64	2	4	4	4	<=0.5	<=1
949	Enterococcus	faecium	923	2010	Animal feed	Ingredient	<=128	<=128	<=512	0.5	0.06	4	1	2	64	2	4	4	4	<=0.5	<=1
950	Enterococcus	faecium	923	2010	Animal feed	Ingredient	<=128	256	<=512	0.5	0.06	4	2	4	64	1	4	4	1	2	<=1
951	Enterococcus	faecium	926	2010	Pet food	Pet food/treat	<=128	<=128	<=512	0.5	0.06	4	1	1	64	2	4	4	4	<=0.5	<=1
952	Enterococcus	faecium	926	2010	Pet food	Pet food/treat	<=128	<=128	<=512	0.5	0.06	2	0.5	4	>64	1	4	4	2	2	<=1
953	Enterococcus	faecium	928	2010	Animal feed	Ingredient	<=128	<=128	<=512	0.5	0.06	2	2	8	64	2	4	4	1	4	<=1
954	Enterococcus	faecium	928	2010	Animal feed	Ingredient	<=128	<=128	<=512	0.5	0.06	1	2	8	64	1	4	4	1	2	32
955	Enterococcus	faecium	930	2010	Animal feed	Animal feed (for unspecified animal species)	<=128	<=128	<=512	0.5	0.12	4	2	4	64	2	4	4	1	2	>32
956	Enterococcus	faecium	930	2010	Animal feed	Animal feed (for unspecified animal species)	<=128	<=128	<=512	1	0.06	4	4	8	>64	2	4	4	1	4	<=1
957	Enterococcus	faecium	933	2010	Animal feed	Ingredient	<=128	<=128	<=512	0.5	0.06	2	2	8	64	2	4	4	1	2	2
958	Enterococcus	faecium	933	2010	Animal feed	Ingredient	<=128	<=128	<=512	0.5	0.06	4	2	4	64	2	4	4	1	2	<=1
959	Enterococcus	faecium	936	2010	Animal feed	Animal feed (for unspecified animal species)	<=128	<=128	<=512	2	0.12	4	1	4	64	1	4	4	>4	2	<=1
960	Enterococcus	faecium	936	2010	Animal feed	Animal feed (for unspecified animal species)	<=128	<=128	<=512	0.5	0.06	2	<=0.25	4	64	2	2	4	1	2	<=1
961	Enterococcus	faecium	937	2010	Pet food	Pet food/treat	<=128	<=128	<=512	0.5	0.12	2	4	2	64	2	<=0.25	4	1	1	<=1
962	Enterococcus	faecium	941	2010	Animal feed	Feed for minor species	<=128	<=128	<=512	1	0.12	4	4	4	64	2	8	4	1	2	>32
963	Enterococcus	faecium	941	2010	Animal feed	Feed for minor species	<=128	<=128	<=512	0.5	0.12	4	2	4	64	2	4	4	1	2	>32
964	Enterococcus	faecium	943	2010	Animal feed	Animal feed (for unspecified animal species)	<=128	<=128	<=512	0.5	0.06	4	4	8	64	2	4	8	1	2	<=1
965	Enterococcus	faecium	943	2010	Animal feed	Animal feed (for unspecified animal species)	<=128	<=128	<=512	0.5	0.06	4	2	4	64	2	8	4	2	2	<=1
966	Enterococcus	faecium	944	2010	Pet food	Pet food/treat	<=128	<=128	<=512	0.5	0.06	2	<=0.25	2	64	2	4	4	1	2	<=1
967	Enterococcus	faecium	945	2010	Animal feed	Ingredient	<=128	<=128	<=512	1	0.06	2	2	4	32	2	4	4	1	2	<=1
968	Enterococcus	faecium	945	2010	Animal feed	Ingredient	<=128	<=128	<=512	0.5	0.06	4	2	2	64	1	4	4	2	1	<=1
969	Enterococcus	faecium	946	2010	Animal feed	Poultry feed	<=128	256	<=512	1	0.06	4	1	8	64	2	4	4	2	4	<=1
970	Enterococcus	faecium	946	2010	Animal feed	Poultry feed	<=128	<=128	<=512	0.5	0.06	4	<=0.25	8	64	2	4	4	2	4	<=1
973	Enterococcus	faecium	949	2010	Animal feed	Animal feed (for unspecified animal species)	<=128	<=128	<=512	0.5	0.06	4	1	2	64	1	4	4	2	2	<=1
974	Enterococcus	faecium	950	2010	Pet food	Pet food/treat	<=128	<=128	<=512	0.5	0.06	2	2	2	>64	2	4	4	1	2	<=1
975	Enterococcus	faecium	950	2010	Pet food	Pet food/treat	<=128	<=128	<=512	<=0.25	0.06	2	2	2	64	1	4	4	1	2	<=1
976	Enterococcus	faecium	951	2010	Animal feed	Poultry feed	<=128	256	<=512	0.5	0.06	2	<=0.25	4	64	2	8	4	2	2	<=1
977	Enterococcus	faecium	951	2010	Animal feed	Poultry feed	<=128	<=128	<=512	0.5	0.06	2	2	4	64	2	4	4	1	2	32
978	Enterococcus	faecium	953	2010	Animal feed	Ingredient	<=128	<=128	<=512	0.5	0.06	2	<=0.25	8	64	2	2	8	1	4	<=1
979	Enterococcus	faecium	953	2010	Animal feed	Ingredient	<=128	<=128	<=512	0.5	0.06	4	<=0.25	8	>64	2	8	4	2	4	<=1
980	Enterococcus	faecium	954	2010	Animal feed	Ingredient	<=128	256	<=512	0.5	0.06	4	4	8	64	2	8	4	2	4	<=1
981	Enterococcus	faecium	954	2010	Animal feed	Ingredient	<=128	<=128	<=512	0.5	0.06	2	<=0.25	8	64	2	4	4	2	4	<=1
982	Enterococcus	faecium	955	2010	Pet food	Pet food/treat	<=128	<=128	<=512	2	0.12	1	1	4	64	1	4	4	2	2	<=1
983	Enterococcus	faecium	957	2010	Animal feed	Poultry feed	<=128	<=128	<=512	0.5	0.06	4	1	4	64	1	2	4	1	2	<=1
984	Enterococcus	faecium	957	2010	Animal feed	Poultry feed	<=128	<=128	<=512	2	0.06	4	<=0.25	4	64	2	4	4	2	2	<=1
985	Enterococcus	faecium	962	2010	Animal feed	Poultry feed	<=128	256	<=512	0.5	0.06	2	4	4	>64	2	4	4	0.5	8	>32
986	Enterococcus	faecium	962	2010	Animal feed	Poultry feed	<=128	<=128	<=512	0.5	0.12	4	2	4	64	1	2	4	2	8	>32
987	Enterococcus	faecium	963	2010	Animal feed	Ingredient	<=128	<=128	<=512	0.5	0.06	2	0.5	4	64	1	4	4	1	2	<=1
988	Enterococcus	faecium	963	2010	Animal feed	Ingredient	<=128	<=128	<=512	0.5	0.06	2	4	2	>64	2	8	4	1	2	<=1
989	Enterococcus	faecium	964	2010	Animal feed	Ingredient	<=128	<=128	<=512	0.5	0.06	4	1	8	64	1	2	4	2	2	<=1
990	Enterococcus	faecium	964	2010	Animal feed	Ingredient	<=128	<=128	<=512	1	0.06	4	2	8	>64	2	4	4	2	4	<=1
991	Enterococcus	faecium	965	2010	Pet food	Pet food/treat	<=128	<=128	<=512	0.5	0.12	2	4	4	64	2	4	4	1	2	>32
992	Enterococcus	faecium	968	2010	Animal feed	Animal feed (for unspecified animal species)	<=128	<=128	<=512	1	0.06	4	2	2	64	2	4	8	2	1	<=1
993	Enterococcus	faecium	968	2010	Animal feed	Animal feed (for unspecified animal species)	<=128	<=128	<=512	0.5	0.06	2	<=0.25	8	>64	2	1	4	2	2	<=1
994	Enterococcus	faecium	972	2010	Animal feed	Poultry feed	<=128	<=128	<=512	0.5	0.12	4	2	4	64	2	4	4	1	2	<=1
995	Enterococcus	faecium	972	2010	Animal feed	Poultry feed	<=128	<=128	<=512	2	0.06	4	1	4	64	1	4	4	2	2	<=1
996	Enterococcus	faecium	973	2010	Animal feed	Ingredient	<=128	<=128	<=512	2	0.06	4	0.5	4	>64	1	4	4	2	2	<=1
997	Enterococcus	faecium	974	2010	Animal feed	Poultry feed	<=128	<=128	<=512	0.5	0.12	2	>8	>32	>64	1	8	8	1	16	>32
998	Enterococcus	faecium	978	2010	Animal feed	Animal feed (for unspecified animal species)	<=128	<=128	<=512	0.5	0.06	4	2	8	64	2	2	4	2	4	<=1
999	Enterococcus	faecium	978	2010	Animal feed	Animal feed (for unspecified animal species)	<=128	<=128	<=512	2	0.06	4	1	2	64	1	4	4	>4	1	<=1
1000	Enterococcus	faecium	979	2010	Animal feed	Ingredient	<=128	<=128	<=512	0.5	0.06	2	2	4	64	1	8	4	1	2	<=1
1001	Enterococcus	faecium	979	2010	Animal feed	Ingredient	<=128	<=128	<=512	0.5	0.06	4	2	4	>64	2	8	4	1	4	<=1
1002	Enterococcus	faecium	979	2010	Animal feed	Ingredient	<=128	<=128	<=512	0.5	0.06	4	4	4	64	2	8	4	1	4	<=1
1003	Enterococcus	faecium	981	2010	Animal feed	Cattle feed	<=128	<=128	<=512	2	0.06	4	2	4	64	2	4	8	4	2	<=1
1004	Enterococcus	faecium	981	2010	Animal feed	Cattle feed	<=128	<=128	<=512	0.5	0.06	2	1	4	64	2	4	4	1	2	<=1
1005	Enterococcus	faecium	986	2010	Pet food	Pet food/treat	<=128	<=128	<=512	0.5	0.06	2	2	4	64	2	4	4	1	2	<=1
1006	Enterococcus	faecium	986	2010	Pet food	Pet food/treat	<=128	<=128	<=512	2	0.06	2	1	4	64	1	4	4	1	2	16
1007	Enterococcus	faecium	989	2010	Pet food	Pet food/treat	<=128	<=128	<=512	2	0.06	4	0.5	1	64	1	4	4	2	2	>32
1008	Enterococcus	faecium	990	2010	Animal feed	Poultry feed	<=128	256	<=512	0.5	0.06	2	2	4	64	2	2	4	1	2	<=1
1009	Enterococcus	faecium	992	2010	Animal feed	Poultry feed	<=128	256	<=512	0.5	0.06	4	2	4	64	1	4	4	1	2	>32
1010	Enterococcus	faecium	992	2010	Animal feed	Poultry feed	<=128	<=128	<=512	0.5	0.06	2	2	4	>64	2	4	4	1	2	<=1
1011	Enterococcus	faecium	993	2010	Animal feed	Feed for minor species	<=128	<=128	<=512	0.5	0.06	4	2	4	64	2	4	4	1	2	16
1012	Enterococcus	faecium	993	2010	Animal feed	Feed for minor species	<=128	256	<=512	0.5	0.06	4	2	8	64	2	4	4	1	4	16
1013	Enterococcus	faecium	994	2010	Animal feed	Cattle feed	<=128	<=128	<=512	0.5	0.06	2	0.5	8	>64	2	8	4	1	2	<=1
1014	Enterococcus	faecium	994	2010	Animal feed	Cattle feed	<=128	<=128	<=512	0.5	0.06	4	2	8	>64	1	2	4	0.5	2	<=1
1015	Enterococcus	faecium	995	2010	Animal feed	Cattle feed	<=128	<=128	<=512	0.5	0.12	2	2	4	64	2	2	4	2	2	<=1
1016	Enterococcus	faecium	995	2010	Animal feed	Cattle feed	<=128	256	<=512	1	0.06	4	0.5	4	>64	1	4	4	1	2	<=1
1017	Enterococcus	faecium	996	2010	Animal feed	Cattle feed	<=128	<=128	<=512	0.5	0.06	2	<=0.25	8	64	2	2	4	1	4	<=1
1018	Enterococcus	faecium	996	2010	Animal feed	Cattle feed	<=128	<=128	<=512	0.5	0.06	4	4	4	64	2	4	4	1	2	<=1
1019	Enterococcus	gallinarum	997	2010	Animal feed	Animal feed (for unspecified animal species)	<=128	<=128	<=512	0.5	0.06	4	0.5	4	16	2	2	4	2	2	<=1
1020	Enterococcus	gallinarum	997	2010	Animal feed	Animal feed (for unspecified animal species)	<=128	<=128	<=512	0.5	0.12	2	0.5	4	16	2	1	4	2	2	<=1
1021	Enterococcus	faecium	1001	2010	Animal feed	Poultry feed	<=128	256	<=512	0.5	0.06	2	2	4	64	2	2	4	1	2	<=1
1022	Enterococcus	faecium	1001	2010	Animal feed	Poultry feed	<=128	<=128	<=512	2	0.06	4	1	2	64	1	2	4	2	2	<=1
1023	Enterococcus	durans	1007	2010	Pet food	Pet food/treat	<=128	<=128	<=512	0.5	0.12	2	<=0.25	2	64	1	2	4	1	2	32
1024	Enterococcus	faecium	1007	2010	Pet food	Pet food/treat	<=128	<=128	<=512	0.5	0.06	4	4	4	>64	2	4	4	2	4	<=1
1025	Enterococcus	faecium	1008	2010	Pet food	Pet food/treat	<=128	<=128	<=512	0.5	0.06	2	<=0.25	4	>64	2	4	4	1	2	<=1
1026	Enterococcus	faecium	1010	2010	Pet food	Pet food/treat	<=128	<=128	<=512	0.5	0.06	2	2	2	>64	1	4	4	0.5	2	<=1
1027	Enterococcus	faecium	1011	2010	Animal feed	Cattle feed	<=128	<=128	<=512	0.5	0.06	2	2	4	64	1	4	4	1	2	>32
1028	Enterococcus	faecium	1011	2010	Animal feed	Cattle feed	<=128	<=128	<=512	0.5	0.12	4	2	4	64	1	4	4	2	2	>32
1029	Enterococcus	faecium	1020	2010	Pet food	Pet food/treat	<=128	<=128	<=512	1	0.06	4	4	4	>64	2	4	4	1	2	4
1030	Enterococcus	faecium	1020	2010	Pet food	Pet food/treat	<=128	<=128	<=512	1	0.06	4	4	4	>64	2	8	4	1	2	<=1
1031	Enterococcus	faecium	1021	2010	Pet food	Pet food/treat	<=128	<=128	<=512	1	0.06	4	4	4	>64	2	8	4	1	4	<=1
1032	Enterococcus	faecium	1021	2010	Pet food	Pet food/treat	<=128	<=128	<=512	0.5	0.06	4	4	4	>64	2	8	4	1	2	<=1
1033	Enterococcus	faecium	1022	2010	Animal feed	Ingredient	<=128	256	<=512	0.5	0.12	2	2	4	64	1	2	4	1	2	<=1
1034	Enterococcus	faecium	1025	2010	Pet food	Pet food/treat	<=128	<=128	<=512	0.5	0.06	2	4	4	64	1	4	4	1	2	>32
1035	Enterococcus	faecium	1025	2010	Pet food	Pet food/treat	<=128	<=128	<=512	8	0.06	4	4	2	64	2	4	4	1	1	<=1
1036	Enterococcus	faecium	1026	2010	Animal feed	Poultry feed	<=128	<=128	<=512	0.5	0.06	2	2	1	>64	1	8	4	4	<=0.5	<=1
1037	Enterococcus	faecium	1028	2011	Pet food	Pet food/treat	<=128	<=128	<=512	1	0.06	4	4	4	>64	2	4	4	1	2	4
1038	Enterococcus	faecium	1028	2011	Pet food	Pet food/treat	<=128	<=128	<=512	1	0.06	4	2	4	>64	2	4	4	1	2	<=1
1040	Enterococcus	faecium	1031	2011	Pet food	Pet food/treat	<=128	<=128	<=512	2	0.06	2	1	1	64	1	2	4	>4	<=0.5	<=1
1041	Enterococcus	faecium	1032	2011	Animal feed	Ingredient	<=128	<=128	<=512	0.5	0.12	4	4	8	>64	2	4	4	1	4	<=1
1042	Enterococcus	faecium	1032	2011	Animal feed	Ingredient	<=128	<=128	<=512	0.5	0.06	4	2	8	>64	1	4	4	1	2	<=1
1043	Enterococcus	faecium	1040	2011	Pet food	Pet food/treat	<=128	<=128	<=512	1	0.06	4	2	8	64	1	4	4	1	4	<=1
1044	Enterococcus	faecium	1040	2011	Pet food	Pet food/treat	<=128	<=128	<=512	1	0.06	4	2	8	64	2	4	4	1	4	<=1
1045	Enterococcus	faecium	1041	2011	Animal feed	Ingredient	<=128	<=128	<=512	0.5	0.06	4	4	4	64	2	8	4	1	2	<=1
1046	Enterococcus	faecium	1041	2011	Animal feed	Ingredient	<=128	<=128	<=512	2	0.06	4	2	4	64	1	4	4	2	2	<=1
1047	Enterococcus	faecium	1042	2011	Animal feed	Cattle feed	<=128	<=128	<=512	2	0.06	4	2	1	>64	1	8	4	2	2	<=1
1048	Enterococcus	faecium	1042	2011	Animal feed	Cattle feed	<=128	<=128	<=512	0.5	0.03	2	<=0.25	4	>64	1	2	4	1	2	<=1
1049	Enterococcus	faecium	1043	2011	Animal feed	Cattle feed	<=128	<=128	<=512	<=0.25	0.06	2	2	2	64	1	4	4	1	2	<=1
1050	Enterococcus	faecium	1043	2011	Animal feed	Cattle feed	<=128	<=128	<=512	0.5	0.06	4	8	1	>64	1	4	4	>4	<=0.5	<=1
1051	Enterococcus	faecium	1044	2011	Animal feed	Cattle feed	<=128	<=128	<=512	0.5	0.03	4	<=0.25	4	64	1	4	4	1	2	<=1
1052	Enterococcus	faecium	1044	2011	Animal feed	Cattle feed	<=128	256	<=512	1	0.06	4	4	8	64	2	2	4	2	2	<=1
1053	Enterococcus	faecium	1045	2011	Pet food	Supplement for pets	<=128	256	<=512	0.5	0.12	2	<=0.25	8	64	1	4	4	2	4	<=1
1054	Enterococcus	faecium	1046	2011	Pet food	Pet food/treat	<=128	<=128	<=512	2	0.06	4	2	4	64	2	2	4	2	2	<=1
1055	Enterococcus	faecium	1047	2011	Animal feed	Ingredient	<=128	<=128	<=512	0.5	0.12	2	2	4	>64	1	4	4	4	2	>32
1056	Enterococcus	faecium	1047	2011	Animal feed	Ingredient	<=128	<=128	<=512	0.5	0.06	2	1	1	64	1	4	4	4	<=0.5	<=1
1057	Enterococcus	faecium	1050	2011	Animal feed	Animal feed (for unspecified animal species)	<=128	<=128	<=512	0.5	0.06	2	4	4	64	2	8	4	2	2	<=1
1058	Enterococcus	faecium	1050	2011	Animal feed	Animal feed (for unspecified animal species)	<=128	<=128	<=512	0.5	0.06	4	2	2	64	2	8	4	1	<=0.5	<=1
1059	Enterococcus	faecium	1058	2011	Pet food	Pet food/treat	<=128	<=128	<=512	0.5	0.12	2	2	2	64	1	4	4	1	2	<=1
1060	Enterococcus	faecium	1058	2011	Pet food	Pet food/treat	<=128	<=128	2048	2	0.06	4	1	4	64	1	2	4	4	2	>32
1061	Enterococcus	faecium	1060	2011	Pet food	Pet food/treat	<=128	256	<=512	0.5	0.12	2	1	4	64	1	4	4	2	2	>32
1062	Enterococcus	faecium	1060	2011	Pet food	Pet food/treat	<=128	<=128	<=512	0.5	0.06	2	2	2	64	2	4	4	1	<=0.5	<=1
1063	Enterococcus	faecium	1061	2011	Pet food	Pet food/treat	<=128	<=128	<=512	0.5	0.06	2	4	4	64	2	8	4	0.5	2	<=1
1064	Enterococcus	faecium	1061	2011	Pet food	Pet food/treat	<=128	<=128	<=512	0.5	0.12	2	2	4	64	1	2	4	2	2	<=1
1065	Enterococcus	faecium	1063	2011	Pet food	Pet food/treat	<=128	<=128	<=512	0.5	0.06	2	4	2	64	2	2	4	0.5	2	<=1
1066	Enterococcus	faecium	1063	2011	Pet food	Pet food/treat	<=128	<=128	<=512	0.5	0.12	2	2	4	>64	2	2	4	1	2	16
1067	Enterococcus	faecium	1064	2011	Pet food	Supplement for pets	<=128	<=128	<=512	2	0.06	4	2	4	>64	1	2	4	>4	2	<=1
1068	Enterococcus	faecium	1064	2011	Pet food	Supplement for pets	<=128	256	<=512	1	0.06	4	4	8	64	2	4	4	2	2	<=1
1069	Enterococcus	gallinarum	1069	2011	Animal feed	Cattle feed	<=128	<=128	<=512	0.5	0.12	4	<=0.25	2	16	2	2	4	1	2	<=1
1070	Enterococcus	faecium	1069	2011	Animal feed	Cattle feed	<=128	<=128	<=512	0.5	0.06	4	<=0.25	4	64	1	4	4	1	2	<=1
1071	Enterococcus	faecium	1073	2011	Animal feed	Animal feed (for unspecified animal species)	<=128	<=128	<=512	1	0.06	4	4	4	>64	2	4	4	1	2	<=1
1072	Enterococcus	faecium	1073	2011	Animal feed	Animal feed (for unspecified animal species)	<=128	256	<=512	1	0.06	4	4	4	>64	2	4	4	1	2	<=1
1073	Enterococcus	faecium	1074	2011	Pet food	Pet food/treat	<=128	256	<=512	0.5	0.06	4	0.5	8	64	2	4	4	2	2	<=1
1074	Enterococcus	faecium	1074	2011	Pet food	Pet food/treat	<=128	256	<=512	0.5	0.06	4	<=0.25	8	64	1	4	4	2	2	<=1
1075	Enterococcus	faecium	1076	2011	Animal feed	Animal feed (for unspecified animal species)	<=128	>1024	2048	0.5	0.06	2	>8	>32	64	1	4	4	1	4	>32
1076	Enterococcus	faecium	1076	2011	Animal feed	Animal feed (for unspecified animal species)	<=128	<=128	2048	0.5	0.12	4	<=0.25	4	64	1	2	4	2	2	>32
1077	Enterococcus	faecium	1079	2011	Animal feed	Ingredient	<=128	<=128	<=512	0.5	0.12	4	4	4	>64	2	4	4	2	4	<=1
1078	Enterococcus	faecium	1079	2011	Animal feed	Ingredient	<=128	<=128	<=512	0.5	0.06	4	2	4	64	2	4	4	2	2	<=1
1079	Enterococcus	faecium	1083	2011	Animal feed	Horse feed	<=128	<=128	<=512	0.5	0.12	2	4	2	64	1	4	4	1	2	>32
1080	Enterococcus	faecium	1083	2011	Animal feed	Horse feed	<=128	<=128	<=512	0.5	0.12	2	4	2	64	1	4	4	1	2	<=1
1081	Enterococcus	faecium	1085	2011	Animal feed	Poultry feed	<=128	<=128	<=512	0.5	0.06	4	2	4	64	1	4	4	1	2	<=1
1082	Enterococcus	faecium	1087	2011	Pet food	Pet food/treat	<=128	<=128	<=512	0.5	0.06	4	4	4	>64	2	4	4	1	2	<=1
1083	Enterococcus	faecium	1087	2011	Pet food	Pet food/treat	<=128	<=128	<=512	0.5	0.12	4	2	4	>64	1	4	4	1	2	<=1
1084	Enterococcus	faecium	1088	2011	Animal feed	Ingredient	<=128	512	<=512	0.5	0.12	2	2	8	>64	2	4	4	2	4	<=1
1085	Enterococcus	faecium	1088	2011	Animal feed	Ingredient	<=128	256	<=512	<=0.25	0.12	2	2	4	>64	1	2	4	2	2	<=1
1086	Enterococcus	faecium	1089	2011	Animal feed	Cattle feed	<=128	<=128	<=512	0.5	0.06	4	4	4	64	1	0.5	4	2	2	<=1
1087	Enterococcus	faecium	1089	2011	Animal feed	Cattle feed	<=128	<=128	<=512	0.5	0.06	2	<=0.25	4	64	1	2	4	2	2	<=1
1088	Enterococcus	faecium	1090	2011	Animal feed	Poultry feed	<=128	256	<=512	1	0.06	2	>8	>32	64	1	8	4	2	8	16
1089	Enterococcus	faecium	1091	2011	Pet food	Pet food/treat	<=128	<=128	<=512	0.5	0.06	2	4	4	64	2	4	8	1	2	<=1
1090	Enterococcus	faecium	1091	2011	Pet food	Pet food/treat	<=128	<=128	<=512	0.5	0.06	2	4	4	64	1	4	4	0.5	2	<=1
1091	Enterococcus	faecium	1092	2011	Pet food	Pet food/treat	<=128	<=128	<=512	0.5	0.12	2	4	4	64	1	8	4	1	2	<=1
1092	Enterococcus	faecium	1092	2011	Pet food	Pet food/treat	<=128	<=128	<=512	0.5	0.06	2	<=0.25	4	64	1	4	4	2	2	<=1
1093	Enterococcus	faecium	1093	2011	Pet food	Pet food/treat	<=128	<=128	<=512	2	0.06	4	1	4	64	1	4	4	2	2	<=1
1094	Enterococcus	faecium	1093	2011	Pet food	Pet food/treat	<=128	<=128	<=512	2	0.06	4	2	4	64	1	4	4	>4	2	<=1
1095	Enterococcus	faecium	1094	2011	Pet food	Pet food/treat	<=128	<=128	<=512	0.5	0.12	2	<=0.25	4	64	2	4	4	4	2	<=1
1096	Enterococcus	faecium	1095	2011	Pet food	Pet food/treat	<=128	<=128	<=512	0.5	0.06	4	4	2	64	2	4	4	1	2	<=1
